# Supplementary material
Source: PubMed Central journal article supplement (PMC11218706)
Supplement: ehp13948.s001.acco.pdf [file ehp13948.s001.acco.pdf]

**Note to readers with disabilities:** *EHP* strives to ensure that all journal content is accessible to all readers. However, some figures and Supplemental Material published in *EHP* articles may not conform to [508 standards](#) due to the complexity of the information being presented. If you need assistance accessing journal content, please contact [ehpsubmissions@niehs.nih.gov](mailto:ehpsubmissions@niehs.nih.gov). Our staff will work with you to assess and meet your accessibility needs within 3 working days.

### **Supplemental Material**

#### **The Role of Biodiversity in the Development of Asthma and Allergic Sensitization: A State-of-the-Science Review**

Inês Paciência, Needhi Sharma, Timo T. Hugg, Aino K. Rantala, Behzad Heibati, Wael K. Al-Delaimy, Maritta S. Jaakkola, and Jouni J.K. Jaakkola

#### **Table of Contents**

##### **PRISMA checklist**

**Table S1.** Characteristics of studies included in the comprehensive review (n=82).

**Table S2.** Main results of studies included in the comprehensive review (n=82) and summary of evidence.

**Table S3.** Microbiota composition between cases and controls for the main phyla/genera detected or effect estimate for the main phyla/genera detected.

**Table S4.** Summary of the evidence on the association between outer layer biodiversity and respiratory outcomes (based on information included in Table 1 "*Outer layer biodiversity*").

**Table S5.** Summary of the evidence on the association between inner layer biodiversity and respiratory outcomes (based on information included in Table 1 "*Inner layer biodiversity*").

##### **References**

## PRISMA checklist

| Section and Topic             | Item # | Checklist item                                                                                                                                                                                                                                                                                       | Location where item is reported |
|-------------------------------|--------|------------------------------------------------------------------------------------------------------------------------------------------------------------------------------------------------------------------------------------------------------------------------------------------------------|---------------------------------|
| <b>TITLE</b>                  |        |                                                                                                                                                                                                                                                                                                      |                                 |
| Title                         | 1      | Identify the report as a systematic review.                                                                                                                                                                                                                                                          | 1                               |
| <b>ABSTRACT</b>               |        |                                                                                                                                                                                                                                                                                                      |                                 |
| Abstract                      | 2      | See the PRISMA 2020 for Abstracts checklist.                                                                                                                                                                                                                                                         | 2                               |
| <b>INTRODUCTION</b>           |        |                                                                                                                                                                                                                                                                                                      |                                 |
| Rationale                     | 3      | Describe the rationale for the review in the context of existing knowledge.                                                                                                                                                                                                                          | 3                               |
| Objectives                    | 4      | Provide an explicit statement of the objective(s) or question(s) the review addresses.                                                                                                                                                                                                               | 3                               |
| <b>METHODS</b>                |        |                                                                                                                                                                                                                                                                                                      |                                 |
| Eligibility criteria          | 5      | Specify the inclusion and exclusion criteria for the review and how studies were grouped for the syntheses.                                                                                                                                                                                          | 4                               |
| Information sources           | 6      | Specify all databases, registers, websites, organisations, reference lists and other sources searched or consulted to identify studies. Specify the date when each source was last searched or consulted.                                                                                            | 4                               |
| Search strategy               | 7      | Present the full search strategies for all databases, registers and websites, including any filters and limits used.                                                                                                                                                                                 | 4                               |
| Selection process             | 8      | Specify the methods used to decide whether a study met the inclusion criteria of the review, including how many reviewers screened each record and each report retrieved, whether they worked independently, and if applicable, details of automation tools used in the process.                     | 4                               |
| Data collection process       | 9      | Specify the methods used to collect data from reports, including how many reviewers collected data from each report, whether they worked independently, any processes for obtaining or confirming data from study investigators, and if applicable, details of automation tools used in the process. | 4-5                             |
| Data items                    | 10a    | List and define all outcomes for which data were sought. Specify whether all results that were compatible with each outcome domain in each study were sought (e.g. for all measures, time points, analyses), and if not, the methods used to decide which results to collect.                        | 4-5                             |
|                               | 10b    | List and define all other variables for which data were sought (e.g. participant and intervention characteristics, funding sources). Describe any assumptions made about any missing or unclear information.                                                                                         | 4-5                             |
| Study risk of bias assessment | 11     | Specify the methods used to assess risk of bias in the included studies, including details of the tool(s) used, how many reviewers assessed each study and whether they worked independently, and if applicable, details of automation tools used in the process.                                    | NA                              |
| Effect measures               | 12     | Specify for each outcome the effect measure(s) (e.g. risk ratio, mean difference) used in the synthesis or presentation of results.                                                                                                                                                                  | NA                              |
| Synthesis methods             | 13a    | Describe the processes used to decide which studies were eligible for each synthesis (e.g. tabulating the study intervention characteristics and comparing against the planned groups for each synthesis (item #5)).                                                                                 | 5                               |
|                               | 13b    | Describe any methods required to prepare the data for presentation or synthesis, such as handling of missing summary statistics, or data conversions.                                                                                                                                                | 5                               |
|                               | 13c    | Describe any methods used to tabulate or visually display results of individual studies and syntheses.                                                                                                                                                                                               | 5                               |
|                               | 13d    | Describe any methods used to synthesize results and provide a rationale for the choice(s). If meta-analysis was performed, describe the model(s), method(s) to identify the presence and extent of statistical heterogeneity, and software package(s) used.                                          | 5                               |

| Section and Topic             | Item # | Checklist item                                                                                                                                                                                                                                                                       | Location where item is reported |
|-------------------------------|--------|--------------------------------------------------------------------------------------------------------------------------------------------------------------------------------------------------------------------------------------------------------------------------------------|---------------------------------|
|                               | 13e    | Describe any methods used to explore possible causes of heterogeneity among study results (e.g. subgroup analysis, meta-regression).                                                                                                                                                 | NA                              |
|                               | 13f    | Describe any sensitivity analyses conducted to assess robustness of the synthesized results.                                                                                                                                                                                         | NA                              |
| Reporting bias assessment     | 14     | Describe any methods used to assess risk of bias due to missing results in a synthesis (arising from reporting biases).                                                                                                                                                              | NA                              |
| Certainty assessment          | 15     | Describe any methods used to assess certainty (or confidence) in the body of evidence for an outcome.                                                                                                                                                                                | NA                              |
| <b>RESULTS</b>                |        |                                                                                                                                                                                                                                                                                      |                                 |
| Study selection               | 16a    | Describe the results of the search and selection process, from the number of records identified in the search to the number of studies included in the review, ideally using a flow diagram.                                                                                         | 5-7                             |
|                               | 16b    | Cite studies that might appear to meet the inclusion criteria, but which were excluded, and explain why they were excluded.                                                                                                                                                          | NA                              |
| Study characteristics         | 17     | Cite each included study and present its characteristics.                                                                                                                                                                                                                            | 5-7                             |
| Risk of bias in studies       | 18     | Present assessments of risk of bias for each included study.                                                                                                                                                                                                                         | NA                              |
| Results of individual studies | 19     | For all outcomes, present, for each study: (a) summary statistics for each group (where appropriate) and (b) an effect estimate and its precision (e.g. confidence/credible interval), ideally using structured tables or plots.                                                     | NA                              |
| Results of syntheses          | 20a    | For each synthesis, briefly summarise the characteristics and risk of bias among contributing studies.                                                                                                                                                                               | NA                              |
|                               | 20b    | Present results of all statistical syntheses conducted. If meta-analysis was done, present for each the summary estimate and its precision (e.g. confidence/credible interval) and measures of statistical heterogeneity. If comparing groups, describe the direction of the effect. | NA                              |
|                               | 20c    | Present results of all investigations of possible causes of heterogeneity among study results.                                                                                                                                                                                       | NA                              |
|                               | 20d    | Present results of all sensitivity analyses conducted to assess the robustness of the synthesized results.                                                                                                                                                                           | NA                              |
| Reporting biases              | 21     | Present assessments of risk of bias due to missing results (arising from reporting biases) for each synthesis assessed.                                                                                                                                                              | NA                              |
| Certainty of evidence         | 22     | Present assessments of certainty (or confidence) in the body of evidence for each outcome assessed.                                                                                                                                                                                  | NA                              |
| <b>DISCUSSION</b>             |        |                                                                                                                                                                                                                                                                                      |                                 |
| Discussion                    | 23a    | Provide a general interpretation of the results in the context of other evidence.                                                                                                                                                                                                    | 7-13                            |
|                               | 23b    | Discuss any limitations of the evidence included in the review.                                                                                                                                                                                                                      | 7-13                            |
|                               | 23c    | Discuss any limitations of the review processes used.                                                                                                                                                                                                                                | 7-8                             |
|                               | 23d    | Discuss implications of the results for practice, policy, and future research.                                                                                                                                                                                                       | 10-13                           |
| <b>OTHER INFORMATION</b>      |        |                                                                                                                                                                                                                                                                                      |                                 |

| Section and Topic                              | Item # | Checklist item                                                                                                                                                                                                                             | Location where item is reported |
|------------------------------------------------|--------|--------------------------------------------------------------------------------------------------------------------------------------------------------------------------------------------------------------------------------------------|---------------------------------|
| Registration and protocol                      | 24a    | Provide registration information for the review, including register name and registration number, or state that the review was not registered.                                                                                             | 4                               |
|                                                | 24b    | Indicate where the review protocol can be accessed, or state that a protocol was not prepared.                                                                                                                                             | 4                               |
|                                                | 24c    | Describe and explain any amendments to information provided at registration or in the protocol.                                                                                                                                            | 7-8                             |
| Support                                        | 25     | Describe sources of financial or non-financial support for the review, and the role of the funders or sponsors in the review.                                                                                                              | 13                              |
| Competing interests                            | 26     | Declare any competing interests of review authors.                                                                                                                                                                                         | 13                              |
| Availability of data, code and other materials | 27     | Report which of the following are publicly available and where they can be found: template data collection forms; data extracted from included studies; data used for all analyses; analytic code; any other materials used in the review. | 14                              |

*From:* Page MJ, McKenzie JE, Bossuyt PM, Boutron I, Hoffmann TC, Mulrow CD, et al. The PRISMA 2020 statement: an updated guideline for reporting systematic reviews. *BMJ* 2021;372:n71. doi: 10.1136/bmj.n71

For more information, visit: <http://www.prisma-statement.org/>

NA: not applicable

**Table S1.** Characteristics of studies included in the comprehensive review (n=82)

| Reference, study year (country)                                         | Study population                         | Study design    | Study size   | Follow-up period | Definition of health outcome and period of assessment                                                                                                                                                                     | Method of data collection for exposure assessment and time-period                                                                                                                                           | (Quali)quantitative results |
|-------------------------------------------------------------------------|------------------------------------------|-----------------|--------------|------------------|---------------------------------------------------------------------------------------------------------------------------------------------------------------------------------------------------------------------------|-------------------------------------------------------------------------------------------------------------------------------------------------------------------------------------------------------------|-----------------------------|
| <i>Outer layer biodiversity</i>                                         |                                          |                 |              |                  |                                                                                                                                                                                                                           |                                                                                                                                                                                                             |                             |
| Ege, et al. <sup>1</sup> , 2011 (Germany)                               | Children (6-13 years)                    | Case-control    | 1 511        | --               | Questionnaires (respiratory and allergic symptoms and asthma diagnosis); atopic sensitization was evaluated by specific IgE antibodies. Cross-sectional survey performed during childhood                                 | Mattress dust samples; single-strand conformation polymorphism (SSCP) gels. Cross-sectional survey performed during childhood                                                                               | quantitative                |
| Ege, et al. <sup>2</sup> , 2012 (Germany)                               | Children (≈ 8 years)                     | Cross-sectional | 489          | --               | Questionnaire (asthma); atopic sensitization was evaluated by specific IgE. Cross-sectional survey performed during childhood                                                                                             | Mattress dust samples; single-stranded DNA and analyzed on SSCP gels. Cross-sectional survey performed during childhood                                                                                     | quantitative                |
| Hanski, et al. <sup>3</sup> , 2012 (Finland)                            | Children (14-18 years)                   | Cross-sectional | 118          | --               | Atopic sensitization was evaluated by skin prick testing and specific IgE. Cross-sectional survey performed during adolescence (2010)                                                                                     | Environmental biodiversity based on land use types surrounding the home within 3km; skin samples, V1-V3 regions of 16S rRNA gene were sequenced. Cross-sectional survey performed during adolescence (2010) | quantitative                |
| Lynch, et al. <sup>4</sup> , 2014 (USA)                                 | Children (3 years)                       | Cohort          | 560          | 3 years          | Atopic sensitization was evaluated by specific IgE at age three.                                                                                                                                                          | Dust samples (living room) collected in the 1 <sup>st</sup> year of life; 16S rRNA gene were sequenced. First year of life                                                                                  | qualitative                 |
| Ciaccio, et al. <sup>5</sup> , 2015 (USA)                               | Children (2.4-4.8 years)                 | Cross-sectional | 19 dwellings | --               | Questionnaires (asthma). Cross-sectional survey performed during childhood (between October 2008 and November 2011)                                                                                                       | Dust samples; 16S rRNA gene were sequenced. Cross-sectional survey performed during childhood (between October 2008 and November 2011)                                                                      | qualitative                 |
| Ruokolainen, et al. <sup>6</sup> , 2015 (Finland and Estonian)          | Children and young adults (0.5-20 years) | Cross-sectional | 1 044        | --               | Atopic sensitization was evaluated by specific IgE. Cross-sectional survey performed during childhood/early adulthood (between 2003 and 2012)                                                                             | Environmental biodiversity based on land use types. Cross-sectional survey performed during childhood/early adulthood (between 2003 and 2012)                                                               | quantitative                |
| Valkonen, et al. <sup>7</sup> , 2015 (Germany, Austria and Switzerland) | Children (6-12 years)                    | Cross-sectional | 224          | --               | Questionnaire (asthma and atopy). Cross-sectional survey performed during childhood                                                                                                                                       | Mattress dust samples, bands based on the gradient gel electrophoresis (DGGE). Cross-sectional survey performed during childhood                                                                            | quantitative                |
| Tischer, et al. <sup>8</sup> , 2016 (Germany)                           | Children aged 6 and 10 years             | Cohort          | 189          | 10 years         | Parent-reported questionnaires (Wheezing in the preceding 12 months at age of 6, 12, 18, 24 months and at 4, 6, and 10 years of age); allergen sensitization was determined by skin prick testing at 18, 36 and 60 months | Dust samples (collected after birth from living room floors). 16S rRNA gene were sequenced                                                                                                                  | quantitative                |

|                                                                |                                  |                             |        |          |                                                                                                                                                                                                                                                                                                                                                                                                                                                                 |                                                                                                                                                 |              |
|----------------------------------------------------------------|----------------------------------|-----------------------------|--------|----------|-----------------------------------------------------------------------------------------------------------------------------------------------------------------------------------------------------------------------------------------------------------------------------------------------------------------------------------------------------------------------------------------------------------------------------------------------------------------|-------------------------------------------------------------------------------------------------------------------------------------------------|--------------|
| Birzele, et al. <sup>9</sup> , 2017 (Austria)                  | Children (6-12 years)            | Cross-sectional             | 86     | --       | Questionnaire (asthma). Cross-sectional survey performed during childhood                                                                                                                                                                                                                                                                                                                                                                                       | Mattress dust and nasal samples. V3-V5 regions of 16S rRNA gene were sequenced. Cross-sectional survey performed during childhood               | quantitative |
| Cavaleiro Rufo, et al. <sup>10</sup> , 2017 (Portugal)         | Children (8-10 years)            | Cross-sectional             | 858    | --       | Questionnaire (asthma); allergic sensitization was determined by skin prick testing. Cross-sectional survey performed during childhood                                                                                                                                                                                                                                                                                                                          | Diversity scores of fungi: number of different fungal species. Cross-sectional survey performed during childhood                                | quantitative |
| Campbell, et al. <sup>11</sup> , 2017 (14 different countries) | 26–54-year-old adults            | Cohort                      | 10 201 | 5 years  | Questionnaire and bronchial hyperresponsiveness to define current asthma; atopic sensitization was evaluated by specific IgE at 41.9 (SD: 7.2) years of age                                                                                                                                                                                                                                                                                                     | Biodiversity score based on childhood (before 5 years old) exposure to cats, dogs, day care, bedroom sharing and older siblings                 | quantitative |
| Dannemiller, et al. <sup>12</sup> , 2016 (USA)                 | Children (5-10 years)            | Cross-sectional             | 196    | --       | Questionnaires (active asthma, severe asthma); atopic sensitization was evaluated by specific IgE. Cross-sectional survey performed during childhood                                                                                                                                                                                                                                                                                                            | Dust samples; V4 regions of 16S rRNA gene were sequenced. Cross-sectional survey performed during childhood                                     | quantitative |
| Karvonen, et al. <sup>13</sup> , 2017 (Finland)                | Children (1 and 6 years)         | Cohort                      | 410    | 6 years  | Questionnaires (asthma, wheezing, cough and atopic dermatitis, at the age of 2, 12, 18, and 24 months, and thereafter annually); atopic sensitization was evaluated by specific IgE (age of 1 and 6 years)                                                                                                                                                                                                                                                      | Dust samples (collected at 2 months of age), qPCR for microbial DNA                                                                             | quantitative |
| Donovan, et al. <sup>14</sup> , 2018 (New Zealand)             | Children (18 years)              | Cohort                      | 49 956 | 18 years | Pharmacy and hospital discharge records (asthma) at 18 years of age                                                                                                                                                                                                                                                                                                                                                                                             | Environmental biodiversity based on vegetation diversity (total number of natural landcover types). Mean lifetime exposure (prenatal to age 18) | quantitative |
| Lai, et al. <sup>15</sup> , 2018 (USA)                         | Children (average 8.1 years old) | Randomized controlled trial | 25     | --       | Telephone survey of the child's parent or caretaker (asthma) at 8.1 years of age                                                                                                                                                                                                                                                                                                                                                                                | Dust samples from classrooms and homes; shotgun metagenomics sequencing at 8.1 years of age                                                     | quantitative |
| Loo, et al. <sup>16</sup> , 2018 (Singapore)                   | Children (3-60 months)           | Cohort                      | 50     | 5 years  | Questionnaires administered at 3, 6, 9, 12, 15, 18, 24, 36, 48 and 60 months; allergen sensitization was determined by skin prick testing (SPT) at 18, 36 and 60 months. Allergic subjects have a positive SPT to at least one of the tested allergens at year 5 and have ever given positive replies to questions on allergic outcomes. Non-allergic subjects have no positive SPT and answered "no" to all questions on allergy in the first 5 years of life. | Dust samples (bed, sofa, and play area). V3-V4 regions of 16S rRNA gene were sequenced at the year 5.5 follow up                                | qualitative  |

|                                                              |                           |                 |                                        |                     |                                                                                                                                                                                               |                                                                                                                                                                                               |              |
|--------------------------------------------------------------|---------------------------|-----------------|----------------------------------------|---------------------|-----------------------------------------------------------------------------------------------------------------------------------------------------------------------------------------------|-----------------------------------------------------------------------------------------------------------------------------------------------------------------------------------------------|--------------|
| O'Connor, et al. <sup>17</sup> , 2018 (USA)                  | Children (3 and 7 years)  | Cohort          | 442                                    | 7 years             | Questionnaires (asthma) and spirometry with bronchodilation at 7 years of age                                                                                                                 | Dust samples collected at 3 months of age; 16S rRNA gene were sequenced                                                                                                                       | qualitative  |
| Pekkanen, et al. <sup>18</sup> , 2018 (7 European countries) | Adults (29–55 years)      | Cross-sectional | 397 (cases: 199; controls: 198)        | --                  | Questionnaire (asthma). Cross-sectional survey performed during adulthood                                                                                                                     | Mattress dust samples; denaturing gradient gel electrophoresis and qPCR assays. Cross-sectional survey performed during adulthood                                                             | quantitative |
| Valkonen, et al. <sup>19</sup> , 2018 (7 European countries) | Adults (29–55 years)      | Cross-sectional | 397                                    | --                  | Questionnaire (asthma); atopic sensitization was evaluated by specific IgE. Cross-sectional survey performed during adulthood                                                                 | Mattress dust samples; qPCR assays. Cross-sectional survey performed during adulthood                                                                                                         | qualitative  |
| Karvonen <sup>20</sup> , 2019 (Finland)                      | Children (10.5 years)     | Cohort          | 373                                    | 10.5-year follow-up | Parent-reported questionnaires (ever and current asthma) at 10.5-year follow-up                                                                                                               | Dust samples (living rooms) at two months of age. V4 regions of 16S rRNA gene were sequenced                                                                                                  | quantitative |
| Kirjavainen, et al. <sup>21</sup> , 2019 (Finland)           | Children (6 years)        | Cohort          | 431                                    | 6 years             | Parent-reported questionnaires (ever and current asthma) at 6 years of age; atopic sensitization was evaluated by specific IgE                                                                | Dust samples (living room floor from farm and non-farm homes) collected at two months of age. V4 regions of 16S rRNA gene were sequenced                                                      | quantitative |
| Cavaleiro Rufo, et al. <sup>22</sup> , 2020 (Portugal)       | Children (8–10 years)     | Cross-sectional | 858                                    | --                  | Questionnaire (asthma and allergic diseases); allergic sensitization was determined by skin prick testing; spirometry with bronchodilation. Cross-sectional survey performed during childhood | species richness index (SRI): included 4 vertebrate groups (amphibians, birds, reptiles and small mammals), totalling 89 different species. Cross-sectional survey performed during childhood | quantitative |
| Fu, et al. <sup>23</sup> , 2020 (Malaysia)                   | Children (14–16 years)    | Cross-sectional | 309                                    | --                  | Questionnaires (asthma symptoms) and validated asthma score to define asthma severity. Cross-sectional survey performed during childhood/adolescence                                          | Floor dust from classrooms; 16S rRNA gene were sequenced. Cross-sectional survey performed during childhood/adolescence                                                                       | quantitative |
| Gangneux, et al. <sup>24</sup> , 2020 (France)               | Children and adults       | Case-control    | 30 dwellings (cases: 15; controls: 15) | --                  | Medical diagnosis (asthma) assessed during childhood and adulthood                                                                                                                            | Dust samples collected during childhood and adulthood; 16S rRNA gene were sequenced                                                                                                           | quantitative |
| Adams, et al. <sup>25</sup> , 2021 (Finland and Netherlands) | Children (≈ 9 years)      | Cohort          | 2734                                   | 1 year              | Questionnaires (respiratory symptoms – wheeze, nocturnal dry cough, rhinitis) administered during late fall/early winter 2008                                                                 | Settled dust samples from classrooms collected during late winter/early spring 2009, late spring/early summer 2009 and during late winter/early spring 2010; 16S rRNA gene were sequenced     | quantitative |
| Cavaleiro Rufo, et al. <sup>26</sup> , 2021 (Portugal)       | Children (4 and 7 years)  | Cohort          | 1 050                                  | 7 years             | Questionnaire (asthma and allergic diseases at the ages of 4 and 7)                                                                                                                           | Species richness index (SRI): included 4 vertebrate groups (amphibians, birds, reptiles and small mammals), totalling 89 different species, assessed at birth                                 | quantitative |
| Cox, et al. <sup>27</sup> , 2021 (USA)                       | Children (7 and 12 years) | Cross-sectional | 170                                    | --                  | Questionnaires (asthma, rhinitis, and wheeze in the previous 12 months); atopic sensitization was evaluated by skin prick                                                                     | Dust samples collected at 7 years of age;                                                                                                                                                     | quantitative |

testing, radioallergosorbent (RAST) and by specific IgE, assessed at 7 and 12 years of age

|                                                               |                                                                |                 |                           |          |                                                                                                                                                                                          |                                                                                                                                                                                         |              |
|---------------------------------------------------------------|----------------------------------------------------------------|-----------------|---------------------------|----------|------------------------------------------------------------------------------------------------------------------------------------------------------------------------------------------|-----------------------------------------------------------------------------------------------------------------------------------------------------------------------------------------|--------------|
| Donovan, et al. <sup>28</sup> , 2021 (USA)                    | Adults                                                         | Cross-sectional | 26 367 census tracts      | --       | Census (asthma). Cross-sectional survey performed during adulthood                                                                                                                       | Plant diversity based on data from the Global Biodiversity Information Facility (GBIF). Cross-sectional survey performed during adulthood                                               | quantitative |
| Fu, et al. <sup>29</sup> , 2021 (China)                       | Young adults (IQR 20–23 years)                                 | Cross-sectional | 357                       | --       | Questionnaires (asthma symptoms) and score of asthma symptoms performed in November and December 2013.                                                                                   | Settled air dust and floor dust samples from dormitory rooms in November and December 2013; 16S rRNA gene were sequenced                                                                | quantitative |
| Fu, et al. <sup>30</sup> , 2021 (China)                       | Children (15-18 years)                                         | Cross-sectional | 1332                      | --       | Questionnaires (asthma and rhinitis symptoms) performed in March 2008                                                                                                                    | Floor dust from classrooms (4 from rural areas and 5 from urban areas) collected in March 2008; 16S rRNA gene were sequenced                                                            | quantitative |
| Hyytiäinen, et al. <sup>31</sup> , 2021 (Finland and Germany) | Children (10 years)                                            | Cohort          | 506                       | 10 years | Atopic sensitization was evaluated by specific IgE at the age of 10 years                                                                                                                | Floor dust samples (collected at the child age of 2-3 months); V4 regions of 16S rRNA gene were sequenced                                                                               | quantitative |
| Lehtimäki, et al. <sup>32</sup> , 2021 (Denmark)              | Children (6 years)                                             | Cohort          | 700                       | 6 years  | Questionnaire (asthma by age 6 years based on quantitative symptom algorithm); atopic sensitization was evaluated by skin prick testing and by specific IgE. evaluated at 6 years of age | Environmental biodiversity based on land use types at birth; Airway and gut microbiota samples collected during 1 <sup>st</sup> year of life, V4 region of 16S rRNA gene were sequenced | quantitative |
| Winnicki, et al. <sup>33</sup> , 2022 (Denmark)               | Individuals born 1995–2015                                     | Cohort          | 40 249                    | 23 years | Hospital contacts for asthma ICD-10 diagnoses or filled prescriptions on asthma medication from 1995 to 2018                                                                             | Danish Biodiversity Map – bioscore (including plants, macrofungi, vertebrates and a subset of insect taxa) assessed during early childhood                                              | qualitative  |
| <i>Inner layer biodiversity</i>                               |                                                                |                 |                           |          |                                                                                                                                                                                          |                                                                                                                                                                                         |              |
| Bisgaard, et al. <sup>34</sup> , 2007 (Denmark)               | Children (5 years)                                             | Cohort          | 321                       | 5 years  | Clinical diagnosis (asthma) assessed at 5 years of age; atopic sensitization was evaluated by specific IgE at 4 years of age                                                             | Hypopharyngeal samples collected at 1 month of age; culture approach                                                                                                                    | quantitative |
| Hilty, et al. <sup>35</sup> , 2010 (Ireland)                  | Children (1-17 years) and adults (37.6±18.2 – 52.9±11.1 years) | Cross-sectional | 24 adults and 23 children | --       | Clinical diagnosis (asthma, COPD). Cross-sectional survey performed during childhood and adulthood                                                                                       | Nose and oropharynx samples (adults) and broncho-alveolar lavage (children); 16S rRNA gene were sequenced. Cross-sectional survey performed during childhood and adulthood              | qualitative  |
| Bisgaard, et al. <sup>36</sup> , 2011 (Denmark)               | Children (6 years)                                             | Cohort          | 411                       | 6 years  | Clinical diagnosis (asthma at 6 years); atopic sensitization was evaluated by skin prick testing and by specific IgE during                                                              | Stool samples collected at 1 and 12 months of age; 16S rRNA gene were sequenced combined with denaturing                                                                                | quantitative |



|                                                   |                                      |                                |                                                                                   |         |                                                                                                                                                              |                                                                                                                                                                |              |
|---------------------------------------------------|--------------------------------------|--------------------------------|-----------------------------------------------------------------------------------|---------|--------------------------------------------------------------------------------------------------------------------------------------------------------------|----------------------------------------------------------------------------------------------------------------------------------------------------------------|--------------|
|                                                   |                                      |                                |                                                                                   |         | the first 6 years of life (½, 1½, 4, and 6 years of age)                                                                                                     | gradient gel electrophoresis and conventional culturing                                                                                                        |              |
| Cardenas, et al. <sup>37</sup> , 2012 (Ecuador)   | Children (±10.2 months)              | Case-control                   | 48 (cases: 24 with non-infectious early onset wheezing; controls: 24)             | --      | Clinical diagnosis (wheeze) assessed at 10.2 months of age                                                                                                   | Oropharyngeal samples collected at 10.2 months of age; V3-V5 region of 16S rRNA gene were sequenced                                                            | qualitative  |
| Marri, et al. <sup>38</sup> , 2013 (USA)          | Adults (≈ 26 years)                  | Cross-sectional                | 20                                                                                | --      | Questionnaire (asthma). Cross-sectional survey performed during adulthood                                                                                    | Induced sputum samples; V6 region of 16S rRNA gene were sequenced. Cross-sectional survey performed during adulthood                                           | qualitative  |
| Abrahamsson, et al. <sup>39</sup> , 2014 (Sweden) | Children (7 years)                   | Cohort                         | 47                                                                                | 7 years | Questionnaire (asthma) and exhaled nitric oxide at 7 years of age                                                                                            | Stool samples collected during the first year of life (1 week, 1 month, 1 year); 16S rRNA gene were sequenced                                                  | quantitative |
| Park, et al. <sup>40</sup> , 2014 (Korea)         | Adults (53.4±17.1 to 68.9±7.2)       | Cross-sectional                | 47 (cases: 18 with asthma, 17 with COPD; controls: 12)                            | --      | NA<br>Cross-sectional survey performed during adulthood                                                                                                      | Oropharynx samples; V1-V3 region of 16S rRNA gene were sequenced. Cross-sectional survey performed during adulthood                                            | quantitative |
| Arrieta, et al. <sup>41</sup> , 2015 (Canada)     | Children (3 years)                   | Case-control                   | 319 (cases: 22 with atopy + wheeze, 87 with atopy, 136 with wheeze; controls: 74) | --      | Questionnaire (asthma, wheeze); atopic sensitization was evaluated by skin prick testing at ages 1, 3 years                                                  | Stool samples collected during the first 100 days of life; V3 region of 16S rRNA gene were sequenced                                                           | qualitative  |
| Denner, et al. <sup>42</sup> , 2016 (USA)         | Adults (44.2±1.8 and 34.3±3.0 years) | Cross-sectional                | 58                                                                                | --      | Clinical diagnosis (severe asthma). Cross-sectional survey performed during adulthood                                                                        | Endobronchial brushings and bronchoalveolar lavage fluid samples; V4 region of 16S rRNA gene were sequenced. Cross-sectional survey performed during adulthood | qualitative  |
| Hevia, et al. <sup>43</sup> , 2016 (Spain)        | Adults (≈ 39 years)                  | Cross-sectional (case-control) | 43                                                                                | --      | Clinical diagnosis (asthma); atopic sensitization was evaluated by specific IgE and by skin prick testing. Cross-sectional survey performed during adulthood | Stool samples; 16S rRNA gene were sequenced. Cross-sectional survey performed during adulthood                                                                 | qualitative  |
| Hua, et al. <sup>44</sup> , 2016 (USA)            | Adults (±45.5 years)                 | Cross-sectional                | 1879                                                                              | --      | Questionnaire (asthma). Cross-sectional survey performed during adulthood                                                                                    | Stool samples; V4 region of 16S rRNA gene were sequenced. Cross-sectional survey performed during adulthood                                                    | quantitative |
| Stiemsma, et al. <sup>45</sup> , 2016 (Canada)    | Children (4 years)                   | Case-control                   | 76 (cases: 39; controls: 37)                                                      | --      | Questionnaires (asthma) performed at 4 years of age                                                                                                          | Stool samples collected at 3 month and 1 year of age; V3 region of 16S rRNA gene were sequenced                                                                | qualitative  |

|                                                                        |                                      |                 |                                                                                                             |          |                                                                                                                                                                                                                                                   |                                                                                                                                                                                                                           |              |
|------------------------------------------------------------------------|--------------------------------------|-----------------|-------------------------------------------------------------------------------------------------------------|----------|---------------------------------------------------------------------------------------------------------------------------------------------------------------------------------------------------------------------------------------------------|---------------------------------------------------------------------------------------------------------------------------------------------------------------------------------------------------------------------------|--------------|
| Zhang, et al. <sup>46</sup> , 2016 (UK)                                | Adults (35.4±10.3 – 47.9±10.9 years) | Cross-sectional | 56                                                                                                          | --       | Clinical diagnosis (severe asthma). Cross-sectional survey performed during adulthood                                                                                                                                                             | Induced sputum samples; V3-V5 region of 16S rRNA gene were sequenced. Cross-sectional survey performed during adulthood                                                                                                   | qualitative  |
| Chiu, et al. <sup>47</sup> , 2017 (Taiwan)                             | Children (3-5 years)                 | Case-control    | 87 (cases: 32 with asthma, 23 with rhinitis; controls: 32)                                                  | --       | Clinical diagnosis (asthma) performed between August 2013 to July 2015                                                                                                                                                                            | Throat swabs collected between August 2013 to July 2015; V3- V4 region of 16S rRNA gene were sequenced                                                                                                                    | qualitative  |
| Depner, et al. <sup>48</sup> , 2017 (Germany, Austria and Switzerland) | Children (12 years)                  | Cross-sectional | 333                                                                                                         | --       | Questionnaires (asthma). Cross-sectional survey performed during childhood                                                                                                                                                                        | Throat (327) and nasal (68) samples; Cross-sectional survey performed during childhood                                                                                                                                    | quantitative |
| Li, et al. <sup>49</sup> , 2017 (China)                                | Adults (39.6±8.6 to 52.0±9.3 years)  | Case-control    | 113 (cases: 49 non-smoking asthma patients, 25 with severe asthma, 24 with non-severe asthma; controls: 15) | --       | Severe asthma was defined according to the ERS/ATS guidelines on severe asthma, while asthma severity was based on the GINA criteria; atopic sensitization was evaluated by skin prick testing. Cross-sectional survey performed during adulthood | Induced sputum samples; V3-V5 region of 16S rRNA gene were sequenced. Cross-sectional survey performed during adulthood                                                                                                   | quantitative |
| Ruokolainen, et al. <sup>50</sup> , 2017 (Finnish and Russian Karelia) | Children (14-20 years)               | Cohort          | 180                                                                                                         | 10 years | Questionnaires (asthma); atopic sensitization was evaluated by specific IgE assessed in 2003, 2010 and 2012                                                                                                                                       | Skin microbiota collected in 2012; V1-V3 region of 16S rRNA gene were sequenced                                                                                                                                           | qualitative  |
| Arrieta, et al. <sup>51</sup> , 2018 (Ecuador)                         | Children (5 years)                   | Case-control    | 97 (cases: 27 children with atopic wheeze; controls: 70)                                                    | --       | Questionnaires (wheeze in the previous 12 months and with evidence of atopy based on a positive skin prick test response) performed at 5 years of age                                                                                             | Stool samples collected at 3 months of age; 16S rRNA gene were sequenced                                                                                                                                                  | qualitative  |
| Durack, et al. <sup>52</sup> , 2018 (USA)                              | Adults (28-39 years)                 | Cross-sectional | 45                                                                                                          | --       | Methacholine challenge test (asthma); atopic sensitization was evaluated by specific IgE. Cross-sectional survey performed during adulthood                                                                                                       | Bronchial brushings, oral wash and induced sputum samples. In subset of 27 adults, intranasal brushings were also collected; V4 region of 16S rRNA gene were sequenced. Cross-sectional survey performed during adulthood | qualitative  |
| Fazlollahi, et al. <sup>53</sup> , 2018 (USA)                          | Adults (≈ 32 years)                  | Cross-sectional | 72                                                                                                          | --       | Questionnaire (exacerbated asthma); Clinical diagnosis (asthma). Cross-sectional survey performed during adulthood                                                                                                                                | Nasal samples; V3-V4 region of 16S rRNA gene were sequenced. Cross-sectional survey performed during adulthood                                                                                                            | qualitative  |

|                                                    |                                        |                 |                                                                              |           |                                                                                                                                                                                                                              |                                                                                                                                               |              |
|----------------------------------------------------|----------------------------------------|-----------------|------------------------------------------------------------------------------|-----------|------------------------------------------------------------------------------------------------------------------------------------------------------------------------------------------------------------------------------|-----------------------------------------------------------------------------------------------------------------------------------------------|--------------|
| Kim, et al. <sup>54</sup> , 2018 (South Korea)     | Children (6-10 years)                  | Case-control    | 92 (62 cases: 31 with asthma and 30 with asthma in remission; controls: 31)  | --        | Asthma was diagnosed by pediatric allergists based on symptoms and methacholine challenge test; atopic sensitization was evaluated by skin prick testing and by specific IgE, assessed between June, 2014, and January, 2016 | Nasopharyngeal samples collected between June, 2014, and January, 2016; 16S rRNA gene were sequenced                                          | qualitative  |
| Okba, et al. <sup>55</sup> , 2018 (Egypt)          | Adults (18-45 years)                   | Case-control    | 120 (cases: 80; controls: 40)                                                | --        | Questionnaire (asthma); atopic sensitization was evaluated by skin prick testing. Cross-sectional survey performed during adulthood                                                                                          | Stool samples; culture-based approach. Cross-sectional survey performed during adulthood                                                      | qualitative  |
| Stokholm, et al. <sup>56</sup> , 2018 (Denmark)    | Children (5 years)                     | Cohort          | 690                                                                          | 5 years   | Diary records (asthma) at age 5 years                                                                                                                                                                                        | Stool samples collected during the 1 <sup>st</sup> year of life; 16S rRNA gene were sequenced                                                 | qualitative  |
| Wang, et al. <sup>57</sup> , 2018 (UK)             | Adults (36-80 years)                   | Case-control    | 221                                                                          | --        | NA<br>Cross-sectional survey performed during adulthood                                                                                                                                                                      | Stool samples; Cross-sectional survey performed during adulthood                                                                              | qualitative  |
| Bannier, et al. <sup>58</sup> , 2019 (Netherlands) | Children (6 years)                     | Case-control    | 252 (cases: 202; controls: 50)                                               | --        | Clinical diagnosis (asthma); atopic sensitization was evaluated by specific IgE at 6 years of age                                                                                                                            | Stool samples collected at 2-4 aged; V3-V4 region of 16S rRNA gene were sequenced                                                             | qualitative  |
| Espuela-Ortiz, et al. <sup>59</sup> , 2019 (USA)   | Children and young adults (6-21 years) | Case-control    | 114 (cases: 57; controls: 57)                                                | --        | Clinical diagnosis (asthma). Cross-sectional survey performed during childhood and early adulthood                                                                                                                           | Saliva samples; V4 region of 16S rRNA gene were sequenced. Cross-sectional survey performed during childhood and early adulthood              | quantitative |
| Lee, et al. <sup>60</sup> , 2019 (South Korea)     | Adults (18-45 years; ≥ 65 years)       | Cross-sectional | 80                                                                           | --        | Clinical diagnosis (airway obstruction reversibility, methacholine challenge test, symptoms, treatment). Cross-sectional survey performed during adulthood                                                                   | Upper airway nasopharyngeal samples; 16S rRNA gene were sequenced. Cross-sectional survey performed during adulthood                          | qualitative  |
| Pang, et al. <sup>61</sup> , 2019 (China)          | Adults (37-41 years)                   | Case-control    | 36 (cases: 10 eosinophilic asthma, 14 non-eosinophilic asthma; controls: 12) | --        | Clinical diagnosis and spirometry with bronchodilation. Survey performed during adulthood                                                                                                                                    | Induced sputum samples; V3-V4 region of 16S rRNA gene were sequenced. Survey performed during adulthood                                       | qualitative  |
| Powell, et al. <sup>62</sup> , 2019 (UK)           | Children (24 months)                   | Cohort          | 159                                                                          | 24 months | Medical records (wheeze) assessed after the 2 years visit                                                                                                                                                                    | Oropharyngeal samples collected at six time-points (6 weeks, 6, 9, 12, 18 and 24 months of age); V3-V5 region of 16S rRNA gene were sequenced | qualitative  |
| Samra, et al. <sup>63</sup> , 2019 (South Korea)   | Children (5-12 years)                  | Cross-sectional | 118                                                                          | --        | Hospital visits (asthma attack) and methacholine/provocholine challenge test; atopic sensitization was evaluated by skin prick testing and by specific IgE. Cross-                                                           | Urine bacteria-derived extracellular vesicle (EV)s. Cross-sectional survey performed during childhood                                         | qualitative  |

|                                                                 |                                          |                 |                                                                              |          |                                                                                                                                    |                                                                                                                                   |              |
|-----------------------------------------------------------------|------------------------------------------|-----------------|------------------------------------------------------------------------------|----------|------------------------------------------------------------------------------------------------------------------------------------|-----------------------------------------------------------------------------------------------------------------------------------|--------------|
|                                                                 |                                          |                 |                                                                              |          | sectional survey performed during childhood                                                                                        |                                                                                                                                   |              |
| Thorsen, et al. <sup>64</sup> , 2019 (Denmark)                  | Children (6 years)                       | Cohort          | 700                                                                          | 6 years  | Daily diary (asthma); atopic sensitization was evaluated by skin prick testing and by specific IgE at 6 years of age               | Airways samples collected at age 1 month; 16S rRNA gene were sequenced                                                            | quantitative |
| Al Bataineh, et al. <sup>65</sup> , 2020 (United Arab Emirates) | Children (7 years) and adults (52 years) | Case-control    | 40 (cases: 21 asthmatics; controls: 19)                                      | --       | Questionnaire (asthma) Survey performed during childhood and adulthood                                                             | Expectorated sputum samples; 16S rRNA gene were sequenced. Survey performed during childhood and adulthood                        | qualitative  |
| Chiu, et al. <sup>66</sup> , 2020 (Taiwan)                      | Children (4-5 years)                     | Case-control    | 60 (cases: 20 with allergic rhinitis, 19 with allergic asthma; controls: 22) | --       | Questionnaire (asthma, atopic diseases). Survey performed during childhood                                                         | Stool and airway samples; V3-V4 region of 16S rRNA gene were sequenced. Survey performed during childhood                         | qualitative  |
| Patrick, et al. <sup>67</sup> , 2020 (Canada)                   | Children (5 years)                       | Cohort          | 917                                                                          | 5 years  | Record from the British Columbia Ministry of Health Chronic Disease Dashboard (asthma) at age 5 years                              | Stool samples collected at 3 and 12 months of age; 16S rRNA gene were sequenced                                                   | quantitative |
| Ruokolainen, et al. <sup>68</sup> , 2020 (Finland and Estonian) | Children (18 months of age)              | Cross-sectional | 717                                                                          | --       | Atopic sensitization was evaluated by specific IgE at 18 months of age                                                             | Stool, nasal and skin samples of 6-month-old; V1-V3 region of 16S rRNA gene were sequenced                                        | qualitative  |
| Toivonen, et al. <sup>69</sup> , 2020 (Finland)                 | Children (7 years)                       | Cohort          | 923                                                                          | 7 years  | Medical records (asthma) at age 7 years                                                                                            | Nasal samples collected at ages 2, 13, and 24 months; V4 region of 16S rRNA gene were sequenced                                   | quantitative |
| Ham, et al. <sup>70</sup> , 2021 (South Korea)                  | Adults (49-58.44 years)                  | Case-control    | 97 (cases: 42 with non-severe asthma, 32 with severe asthma; controls: 23)   | --       | Spirometry with bronchodilation and methacholine or mannitol challenge test (asthma) performed between December 2016 and June 2017 | Airway (sputum) and stool samples collected between December 2016 and June 2017; V3-V4 region of 16S rRNA gene were sequenced     | qualitative  |
| Niemeier-Walsh, et al. <sup>71</sup> , 2021 (USA)               | Children (12 years)                      | Cohort          | 40                                                                           | 12 years | Questionnaire (asthma); atopic sensitization was evaluated by skin prick testing at 12 years of age                                | Saliva and induced sputum samples collected at age 14 years; 16S rRNA gene were sequenced                                         | quantitative |
| Samra, et al. <sup>72</sup> , 2021 (South Korea)                | Children (~10 years)                     | Cross-sectional | 49                                                                           | --       | Atopic sensitization was evaluated by skin prick testing and by specific IgE. Cross-sectional survey performed during childhood    | Urine samples (bacterial extracellular vesicles); 16S rRNA gene were sequenced. Cross-sectional survey performed during childhood | qualitative  |
| Schei, et al. <sup>73</sup> , 2021 (Norway)                     | Children (6 years)                       | Cohort          | 278                                                                          | 6 years  | Questionnaires (asthma) at 6 years of age                                                                                          | Stool samples collected at 4 timepoints between 0 and 2 years                                                                     | quantitative |

|                                                |                              |                 |                                                                                                    |         |                                                                                                                                                                                                                               |                                                                                                                                                        |                     |
|------------------------------------------------|------------------------------|-----------------|----------------------------------------------------------------------------------------------------|---------|-------------------------------------------------------------------------------------------------------------------------------------------------------------------------------------------------------------------------------|--------------------------------------------------------------------------------------------------------------------------------------------------------|---------------------|
| Seppo, et al. <sup>74</sup> , 2021 (USA)       | Children (3 years)           | Cohort          | 104                                                                                                | 3 years | Telephone follow-up for allergic symptoms by a paediatric allergist (asthma, respiratory symptoms, atopic diseases) by 3 years of age                                                                                         | Stool samples collected between 2 weeks and 6 months of age; V4 region of 16S rRNA gene were sequenced                                                 | qualitative         |
| Turek, et al. <sup>75</sup> , 2021 (Australia) | Adults (±56 years)           | Cross-sectional | 529                                                                                                | --      | Questionnaire (asthma). Cross-sectional survey performed during adulthood                                                                                                                                                     | Posterior oropharyngeal samples; V4 region of 16S rRNA gene were sequenced. Cross-sectional survey performed during adulthood                          | qualitative         |
| Bar et al. <sup>76</sup> , 2022 (Poland)       | Children (6–17 years of age) | Cross-sectional | 38 (19 asthmatic and 19 healthy group)                                                             | --      | Asthma doctor-diagnosed                                                                                                                                                                                                       | Exhaled breath condensates and oropharyngeal samples; V3-V4 regions of 16S rRNA gene were sequenced. Cross-sectional survey performed during childhood | quantitative        |
| Lee-Sarwar et al. <sup>77</sup> , 2022 (USA)   | Children (6 years)           | Cohort          | 657 mother–child pairs                                                                             | 6 years | Questionnaires (asthma) at 3 and 6 years of age; asthma as having early, transient or active asthma phenotypes.                                                                                                               | Stool samples collected at ages 3-6 months, 1 and 3 years; V4 region of 16S rRNA gene were sequenced                                                   | quantitative        |
| Lee-Sarwar et al. <sup>78</sup> , 2022 (USA)   | Children (6 years)           | Cohort          | 657 mother–child pairs                                                                             | 6 years | Questionnaires, wheeze proportion between ages 3 and 5 years                                                                                                                                                                  | Stool samples collected at 3 years of age; V4 region of 16S rRNA gene were sequenced                                                                   | quantitative        |
| Tsai et al. <sup>79</sup> , 2022 (Taiwan)      | Children (36 months)         | Cross-sectional | 87 (36 with allergic respiratory diseases and atopy, 21 with atopy alone, and 30 healthy controls) | --      | Asthma doctor-diagnosed (asthma, wheezing symptoms, or use of asthma medication during the last 12 months). Allergic sensitization: total IgE level ≥100 kU/L                                                                 | Nasopharyngeal swabs collected at 36 month; V3-V4 regions of 16S rRNA gene were sequenced. Cross-sectional survey performed during childhood           | quali(quantitative) |
| Zheng et al. <sup>80</sup> , 2022 (China)      | Children (5 to 14 years)     | Cross-sectional | 57 (20 healthy children, 27 allergic asthmatic children, and 10 non-allergic asthmatic children)   | --      | Asthma doctor-diagnosed (GINA)                                                                                                                                                                                                | Stool samples; V4 region of 16S rRNA gene were sequenced. Cross-sectional survey performed during childhood                                            | qualitative         |
| Mubanga et al. <sup>81</sup> , 2023 (Sweden)   | Children (9-14 years)        | Cohort          | 355                                                                                                | --      | national health registers and questionnaires (Allergic asthma was defined as a composite outcome based on an asthma diagnosis (questionnaire) and IgE). Groups: Non-allergic asthma, allergy only (IgE+), and allergic asthma | Stool samples                                                                                                                                          | qualitative         |

|                                                  |                       |        |     |   |                                                              |                                                                                                 |              |
|--------------------------------------------------|-----------------------|--------|-----|---|--------------------------------------------------------------|-------------------------------------------------------------------------------------------------|--------------|
| Thorsen et al. <sup>82</sup> ,<br>2023 (Denmark) | Children (7<br>years) | Cohort | 285 | 7 | Questionnaire (asthma), persistent<br>wheeze/asthma by age 7 | Nasopharyngeal swabs from 1-month<br>neonates; V3-V4 regions of 16S rRNA<br>gene were sequenced | quantitative |
|--------------------------------------------------|-----------------------|--------|-----|---|--------------------------------------------------------------|-------------------------------------------------------------------------------------------------|--------------|

\*\*results reported as median (minimum-maximum)

\*\*\*results reported as mean (standard deviation)

**Table S2.** Main results of studies included in the comprehensive review (n=82) and summary of evidence

| Reference, study year (country)                              | Study population      | Covariates                                                                                  | Main results                                                     | Summary of evidence on the association*               |
|--------------------------------------------------------------|-----------------------|---------------------------------------------------------------------------------------------|------------------------------------------------------------------|-------------------------------------------------------|
| <i>Outer layer biodiversity</i>                              |                       |                                                                                             |                                                                  |                                                       |
| <i>Bacteria diversity score (number of detectable bands)</i> |                       |                                                                                             |                                                                  |                                                       |
| Ege, et al. <sup>103</sup> , 2011 (Germany)                  | Children (6-13 years) | Living in a farm                                                                            | PARSIFAL                                                         | ↓↓ asthma<br>↓ allergic sensitization                 |
|                                                              |                       |                                                                                             | aOR <sub>asthma</sub> (95 %CI)=0.65 (0.45; 0.94)                 |                                                       |
|                                                              |                       |                                                                                             | aOR <sub>allergic sensitization</sub> (95 %CI)=0.86 (0.65; 1.15) |                                                       |
|                                                              |                       |                                                                                             | GABRIELA                                                         |                                                       |
|                                                              |                       |                                                                                             | aOR <sub>asthma</sub> (95 %CI)=0.87 (0.73; 1.03)                 |                                                       |
|                                                              |                       |                                                                                             | aOR <sub>allergic sensitization</sub> (95 %CI)=0.93 (0.79; 1.11) |                                                       |
|                                                              |                       |                                                                                             | PCA 4                                                            |                                                       |
|                                                              |                       |                                                                                             | PARSIFAL                                                         |                                                       |
|                                                              |                       |                                                                                             | aOR <sub>asthma</sub> (95 %CI)=0.62 (0.42; 0.91)                 |                                                       |
|                                                              |                       |                                                                                             | PCA 5                                                            |                                                       |
|                                                              |                       |                                                                                             | PARSIFAL                                                         |                                                       |
|                                                              |                       |                                                                                             | aOR <sub>asthma</sub> (95 %CI)=0.62 (0.42; 0.91)                 |                                                       |
| Ege, et al. <sup>104</sup> , 2012 (Germany)                  | Children (≈ 8 years)  | farming, family history of atopy, parental education, and mutually for all associated bands | <i>Band 248</i>                                                  | ↓↓ asthma<br>↑↑ asthma [band 300, 318 (high cut off)] |
|                                                              |                       |                                                                                             | OR <sub>asthma</sub> (95% CI)=0.46 (0.24; 0.89)                  |                                                       |
|                                                              |                       |                                                                                             | <i>Band 394</i>                                                  |                                                       |
|                                                              |                       |                                                                                             | OR <sub>asthma</sub> (95% CI)=0.56 (0.32; 0.97)                  |                                                       |
|                                                              |                       |                                                                                             | <i>Band 506</i>                                                  |                                                       |
|                                                              |                       |                                                                                             | OR <sub>asthma</sub> (95% CI)=0.58 (0.38; 0.88)                  |                                                       |
|                                                              |                       |                                                                                             | For a low cut-off:                                               |                                                       |
|                                                              |                       |                                                                                             | <i>Band 394</i>                                                  |                                                       |
|                                                              |                       |                                                                                             | OR <sub>asthma</sub> (95% CI)=0.17 (0.04; 0.72)                  |                                                       |
|                                                              |                       |                                                                                             | <i>Band 506</i>                                                  |                                                       |
|                                                              |                       |                                                                                             | OR <sub>asthma</sub> (95% CI)=0.41 (0.20; 0.83)                  |                                                       |
|                                                              |                       |                                                                                             | For a high cut-off:                                              |                                                       |
| <i>Band 300</i>                                              |                       |                                                                                             |                                                                  |                                                       |
| OR <sub>asthma</sub> (95% CI)=2.42 (1.18; 4.95)              |                       |                                                                                             |                                                                  |                                                       |
| <i>Band 318</i>                                              |                       |                                                                                             |                                                                  |                                                       |
| OR <sub>asthma</sub> (95% CI)=2.32 (1.07; 5.06)              |                       |                                                                                             |                                                                  |                                                       |
| <i>Band 427</i>                                              |                       |                                                                                             |                                                                  |                                                       |
| OR <sub>asthma</sub> (95% CI)=0.45 (0.23; 0.89)              |                       |                                                                                             |                                                                  |                                                       |

|                                                                           |                                          |                                                                                                                        |                                                                                                                                                                                                                                                                                                                                                                                                                                                                                                  |                                                                                                    |
|---------------------------------------------------------------------------|------------------------------------------|------------------------------------------------------------------------------------------------------------------------|--------------------------------------------------------------------------------------------------------------------------------------------------------------------------------------------------------------------------------------------------------------------------------------------------------------------------------------------------------------------------------------------------------------------------------------------------------------------------------------------------|----------------------------------------------------------------------------------------------------|
|                                                                           |                                          |                                                                                                                        | <i>PC1env (forested and agricultural land):</i><br>$\beta_{\text{atopy}} = -0.52, p=0.0059$                                                                                                                                                                                                                                                                                                                                                                                                      |                                                                                                    |
| Hanski, et al. <sup>34</sup> , 2012 (Finland)                             | Children (17-18 years)                   | --                                                                                                                     | <i>Flowering:</i><br>$\beta_{\text{atopy}} = -0.10, p=0.0016$                                                                                                                                                                                                                                                                                                                                                                                                                                    | ↓↓ atopy                                                                                           |
|                                                                           |                                          |                                                                                                                        | <i>Gammaproteobacteria on the skin</i><br>$\beta_{\text{atopy}} = -0.31, p=0.015$                                                                                                                                                                                                                                                                                                                                                                                                                |                                                                                                    |
| Lynch, et al. <sup>7</sup> , 2014 (USA)                                   | Children (3 years)                       | race/ethnicity, gender, mean perceived stress of the mother in the year after birth, and number of smokers in the home | Children with the highest exposure to specific bacteria during their first year were least likely to develop recurrent wheeze and allergic sensitization                                                                                                                                                                                                                                                                                                                                         | ↓ wheeze and allergic sensitization                                                                |
| Ciaccio, et al. <sup>105</sup> , 2015 (USA)                               | Children (2.4-4.8 years)                 | --                                                                                                                     | No significant difference in genus-level richness was found between the asthma homes and control homes                                                                                                                                                                                                                                                                                                                                                                                           | no evidence of effect: asthma                                                                      |
| Ruokolainen, et al. <sup>35</sup> , 2015 (Finland and Estonian)           | Children and young adults (0.5-20 years) | age and data set (study cohort)                                                                                        | <i>Land-use gradient</i><br>OR <sub>allergic sensitization</sub> =1.00 ( $p=0.997$ ) among children aged 0.5-1<br>OR <sub>allergic sensitization</sub> =0.83 ( $p=0.698$ ) among children aged 1.5-3<br>OR <sub>allergic sensitization</sub> =0.33 ( $p=0.034$ ) among children aged 6-12<br>OR <sub>allergic sensitization</sub> =0.09 ( $p=0.003$ ) among children/young adults aged 13-20<br>OR <sub>allergic sensitization</sub> =0.42 ( $p=0.008$ ) among children/young adults aged 0.5-20 | ↓↓ allergic sensitization                                                                          |
|                                                                           |                                          |                                                                                                                        | There was also a protective trend ( $p=0.097$ ) of high bacterial diversity (Shannon index) on atopy. Individual bacterial groups and diversity were not clearly associated with asthma.<br>7 and 2 bands: associated to a protective and adverse risk from developing allergic sensitization, respectively;<br>5 and 1 bands: associated to be a protective and adverse risk from developing asthma, respectively.                                                                              | ↓ atopy<br>no evidence of effect: asthma<br>↑ asthma and allergic sensitization (bands 1, 2, 5, 7) |
| Valkonen, et al. <sup>106</sup> , 2015 (Germany, Austria and Switzerland) | Children (6-12 years)                    | sex and age                                                                                                            | exposed non-farm children:<br><i>Shannon index</i><br>Median (min; max) <sub>asthma</sub> =2.56 (1.93; 2.95)<br>Median (min; max) <sub>atopy</sub> =2.62 (0.68; 3.01)<br>Median (min; max) <sub>healthy children</sub> =2.71 (2.30; 3.05)                                                                                                                                                                                                                                                        | ↓↓ asthma and atopy (median)                                                                       |
|                                                                           |                                          |                                                                                                                        | non-exposed non-farm children:<br><i>Shannon index</i><br>Median (min; max) <sub>asthma</sub> =2.59 (2.36; 2.88)                                                                                                                                                                                                                                                                                                                                                                                 |                                                                                                    |



|                                                                |                              |                                                                                      |                                                                                                                                                                                                                                                                                                                                                                                                                                                                                                                                                                                                                                                                                            |                                                                                                               |
|----------------------------------------------------------------|------------------------------|--------------------------------------------------------------------------------------|--------------------------------------------------------------------------------------------------------------------------------------------------------------------------------------------------------------------------------------------------------------------------------------------------------------------------------------------------------------------------------------------------------------------------------------------------------------------------------------------------------------------------------------------------------------------------------------------------------------------------------------------------------------------------------------------|---------------------------------------------------------------------------------------------------------------|
|                                                                |                              |                                                                                      | Median (min; max) <sub>atopy</sub> =2.54 (2.01; 3.02)<br>Median (min; max) <sub>healthy children</sub> =2.68 (1.87; 3.04)                                                                                                                                                                                                                                                                                                                                                                                                                                                                                                                                                                  |                                                                                                               |
| Tischer, et al. <sup>107</sup> , 2016 (Germany)                | Children aged 6 and 10 years | sex, maternal education, and season of dust sampling                                 | <i>bacterial diversity:</i><br>sensitization to aero-allergens at 6y<br>3 <sup>rd</sup> tertile: aOR (95% CI)=0.45 (0.18; 1.11)<br>sensitization to aero-allergens at 10 years<br>3 <sup>rd</sup> tertile: aOR (95% CI)=0.45 (0.18; 1.11)<br><br>wheezing at 10 years<br>3 <sup>rd</sup> tertile: aOR (95% CI)=1.00 (0.45; 2.06)                                                                                                                                                                                                                                                                                                                                                           | ↓ allergic sensitization<br>no evidence of effect:<br>wheezing                                                |
| Birzele, et al. <sup>20</sup> , 2017 (Austria)                 | Children (6-12 years)        | farming and for the respective diversity measurement in nasal swabs or mattress dust | Mattress dust:<br><i>Richness</i><br>aOR <sub>asthma</sub> (95% CI)=0.48 (0.22; 1.02)<br>Shannon index<br>aOR <sub>asthma</sub> (95% CI)=0.41 (0.21; 0.83)<br><br>Nasal samples:<br><i>Richness</i><br>aOR <sub>asthma</sub> (95% CI)= 0.63 (0.38; 1.06)<br>Shannon index<br>aOR <sub>asthma</sub> (95% CI)=0.66 (0.39; 1.12)                                                                                                                                                                                                                                                                                                                                                              | ↓ asthma                                                                                                      |
| Cavaleiro Rufo, et al. <sup>108</sup> , 2017 (Portugal)        | Children (8-10 years)        | age and height                                                                       | No significant association were observed between diversity score and asthma<br><br>3 <sup>rd</sup> quartile: OR <sub>allergic sensitization</sub> (95% CI)=0.63 (0.40; 0.98)<br>4 <sup>th</sup> quartile: OR <sub>allergic sensitization</sub> (95% CI)=0.60 (0.40; 0.92)                                                                                                                                                                                                                                                                                                                                                                                                                  | no evidence of effect:<br>asthma<br><br>↓↓ allergic sensitization                                             |
| Campbell, et al. <sup>87</sup> , 2017 (14 different countries) | 26–54-year-old adults        | age, sex, study center, smoking, family history of allergic disease                  | lived in an inner city:<br><i>microbial load score 2</i><br>OR <sub>allergic sensitization</sub> (95% CI)=0.77 (0.55; 1.09)<br>OR <sub>current asthma</sub> (95% CI)=0.80 (0.32; 2.00)<br>OR <sub>allergic sensitization and asthma</sub> (95% CI)=1.16 (0.47; 2.88)<br><br><i>microbial load score 3</i><br>OR <sub>allergic sensitization</sub> (95% CI)=0.70 (0.49; 1.00)<br>OR <sub>current asthma</sub> (95% CI)=0.48 (0.17; 1.34)<br>OR <sub>allergic sensitization and asthma</sub> (95% CI)=1.26 (0.50; 3.13)<br><br><i>microbial load score 4/5</i><br>OR <sub>allergic sensitization</sub> (95% CI)=0.61 (0.41; 0.90)<br>OR <sub>current asthma</sub> (95% CI)=0.31 (0.08; 1.11) | ↓ asthma<br>↓↓ allergic sensitization (microbial load score 3 and 4/5)<br>↑ allergic sensitization and asthma |

|                                                  |                          |                                                                                                                                                                                                                                   |                                                                                                                                                                                                                                  |                                                          |
|--------------------------------------------------|--------------------------|-----------------------------------------------------------------------------------------------------------------------------------------------------------------------------------------------------------------------------------|----------------------------------------------------------------------------------------------------------------------------------------------------------------------------------------------------------------------------------|----------------------------------------------------------|
|                                                  |                          |                                                                                                                                                                                                                                   | OR allergic sensitization and asthma (95% CI)=1.57 (0.60; 4.10)                                                                                                                                                                  |                                                          |
|                                                  |                          |                                                                                                                                                                                                                                   | <i>Bacterial richness</i>                                                                                                                                                                                                        |                                                          |
|                                                  |                          |                                                                                                                                                                                                                                   | OR <sub>asthma severity</sub> (95% CI)=0.55 (0.30; 0.99) among all children                                                                                                                                                      |                                                          |
|                                                  |                          |                                                                                                                                                                                                                                   | OR <sub>asthma severity</sub> (95% CI)=0.38 (0.16; 0.90) among atopic children                                                                                                                                                   |                                                          |
| Dannemiller, et al. <sup>109</sup> , 2016 (USA)  | Children (5-10 years)    | --                                                                                                                                                                                                                                | <i>low bacterial richness:</i>                                                                                                                                                                                                   | ↑ asthma severity                                        |
|                                                  |                          |                                                                                                                                                                                                                                   | OR <sub>asthma severity</sub> (95% CI)=0.77 (0.34; 1.75) among atopic children                                                                                                                                                   | ↓↓ asthma severity (all children) (bacterial richness)   |
|                                                  |                          |                                                                                                                                                                                                                                   | <i>Bacterial concentration</i>                                                                                                                                                                                                   |                                                          |
|                                                  |                          |                                                                                                                                                                                                                                   | OR <sub>asthma severity</sub> (95% CI)=1.04 (0.60; 1.82) among all children                                                                                                                                                      |                                                          |
|                                                  |                          |                                                                                                                                                                                                                                   | OR <sub>asthma severity</sub> (95% CI)= 1.13 (0.51; 2.49) among atopic children                                                                                                                                                  |                                                          |
|                                                  |                          |                                                                                                                                                                                                                                   | OR <sub>asthma severity</sub> (95% CI)=0.94 (0.42; 2.11) among non-atopic children                                                                                                                                               |                                                          |
|                                                  |                          |                                                                                                                                                                                                                                   | No significant association were observed between microbial quantity or diversity scores and asthma or respiratory symptoms up to the age of 6 years and current asthma and sensitization to inhalant allergen at 6 years of age. | no evidence of effect: asthma and allergic sensitization |
|                                                  |                          |                                                                                                                                                                                                                                   | <i>Quantity score</i>                                                                                                                                                                                                            |                                                          |
|                                                  |                          |                                                                                                                                                                                                                                   | 2 <sup>nd</sup> quintile: aOR <sub>asthma ever</sub> (95% CI)=1.73 (0.67; 4.45)                                                                                                                                                  |                                                          |
|                                                  |                          |                                                                                                                                                                                                                                   | 3 <sup>rd</sup> quintile: aOR <sub>asthma ever</sub> (95% CI)=2.24 (0.87; 5.75)                                                                                                                                                  |                                                          |
|                                                  |                          |                                                                                                                                                                                                                                   | 4 <sup>th</sup> quintile: aOR <sub>asthma ever</sub> (95% CI)=1.78 (0.67; 4.69)                                                                                                                                                  |                                                          |
|                                                  |                          |                                                                                                                                                                                                                                   | 5 <sup>th</sup> quintile: aOR <sub>asthma ever</sub> (95% CI)=0.34 (0.09; 1.36)                                                                                                                                                  |                                                          |
|                                                  |                          |                                                                                                                                                                                                                                   | 2 <sup>nd</sup> quintile: aOR <sub>current asthma</sub> (95% CI)=1.32 (0.38; 4.61)                                                                                                                                               | ↑ allergic sensitization (diversity score)               |
|                                                  |                          |                                                                                                                                                                                                                                   | 3 <sup>rd</sup> quintile: aOR <sub>current asthma</sub> (95% CI)=2.01 (0.59; 6.79)                                                                                                                                               |                                                          |
|                                                  |                          |                                                                                                                                                                                                                                   | 4 <sup>th</sup> quintile: aOR <sub>current asthma</sub> (95% CI)=1.86 (0.55; 6.32)                                                                                                                                               |                                                          |
|                                                  |                          |                                                                                                                                                                                                                                   | 5 <sup>th</sup> quintile: aOR <sub>current asthma</sub> (95% CI)=0.39 (0.07; 2.11)                                                                                                                                               | ↓↓ current asthma, wheezing (diversity score)            |
|                                                  |                          |                                                                                                                                                                                                                                   | 2 <sup>nd</sup> quintile: aOR <sub>wheezing</sub> (95% CI)=0.65 (0.35; 1.22)                                                                                                                                                     |                                                          |
|                                                  |                          |                                                                                                                                                                                                                                   | 3 <sup>rd</sup> quintile: aOR <sub>wheezing</sub> (95% CI)=0.89 (0.49; 1.62)                                                                                                                                                     |                                                          |
|                                                  |                          |                                                                                                                                                                                                                                   | 4 <sup>th</sup> quintile: aOR <sub>wheezing</sub> (95% CI)=0.98 (0.55; 1.75)                                                                                                                                                     |                                                          |
|                                                  |                          |                                                                                                                                                                                                                                   | 5 <sup>th</sup> quintile: aOR <sub>wheezing</sub> (95% CI)=0.73 (0.43; 1.24)                                                                                                                                                     |                                                          |
|                                                  |                          |                                                                                                                                                                                                                                   | 2 <sup>nd</sup> quintile: aOR <sub>allergic sensitization</sub> (95% CI)=2.19 (0.92; 5.23)                                                                                                                                       |                                                          |
|                                                  |                          |                                                                                                                                                                                                                                   | 3 <sup>rd</sup> quintile: aOR <sub>allergic sensitization</sub> (95% CI)=1.42 (0.55; 3.64)                                                                                                                                       |                                                          |
|                                                  |                          |                                                                                                                                                                                                                                   | 4 <sup>th</sup> quintile: aOR <sub>allergic sensitization</sub> (95% CI)=1.32 (0.51; 3.40)                                                                                                                                       |                                                          |
|                                                  |                          |                                                                                                                                                                                                                                   | 5 <sup>th</sup> quintile: aOR <sub>allergic sensitization</sub> (95% CI)=1.50 (0.61; 3.70)                                                                                                                                       |                                                          |
|                                                  |                          |                                                                                                                                                                                                                                   | <i>Diversity score</i>                                                                                                                                                                                                           |                                                          |
| Karvonen, et al. <sup>110</sup> , 2017 (Finland) | Children (1 and 6 years) | study cohort, farming, maternal history of allergic diseases, gender, number of older siblings, smoking during pregnancy. Models of sensitization to inhalant allergens are additionally adjusted for floor type of dust sampling |                                                                                                                                                                                                                                  |                                                          |

|                                                               |                                  |                                                                                                                                                                                                |                                                                                                                                                                                                                                                                                                                                                                                                                                                                                                                                                                                                                                                                                                                                                                                                                                                                                      |                                                          |
|---------------------------------------------------------------|----------------------------------|------------------------------------------------------------------------------------------------------------------------------------------------------------------------------------------------|--------------------------------------------------------------------------------------------------------------------------------------------------------------------------------------------------------------------------------------------------------------------------------------------------------------------------------------------------------------------------------------------------------------------------------------------------------------------------------------------------------------------------------------------------------------------------------------------------------------------------------------------------------------------------------------------------------------------------------------------------------------------------------------------------------------------------------------------------------------------------------------|----------------------------------------------------------|
|                                                               |                                  |                                                                                                                                                                                                | <p>5 score: aOR<sub>asthma ever</sub> (95% CI)=0.69 (0.27; 1.78)<br/> 6 score: aOR<sub>asthma ever</sub> (95% CI)=1.03 (0.43; 2.49)<br/> 7-8 score: aOR<sub>asthma ever</sub> (95% CI)=0.64 (0.15; 2.76)</p> <p>5 score: aOR<sub>current asthma</sub> (95% CI)=0.30 (0.10; 0.89)<br/> 6 score: aOR<sub>current asthma</sub> (95% CI)=0.35 (0.12; 0.94)<br/> 7-8 score: aOR<sub>current asthma</sub> (95% CI)=0.40 (0.07; 2.29)</p> <p>5 score: aOR<sub>wheezing</sub> (95% CI)=0.68 (0.38; 1.20)<br/> 6 score: aOR<sub>wheezing</sub> (95% CI)=0.54 (0.30; 0.97)<br/> 7-8 score: aOR<sub>wheezing</sub> (95% CI)=0.14 (0.06; 0.32)</p> <p>5 score: aOR<sub>allergic sensitization</sub> (95% CI)=2.10 (0.84; 5.27)<br/> 6 score: aOR<sub>allergic sensitization</sub> (95% CI)=2.16 (0.86; 5.45)<br/> 7-8 score: aOR<sub>allergic sensitization</sub> (95% CI)=0.42 (0.12; 1.50)</p> |                                                          |
| Donovan, et al. <sup>33</sup> , 2018 (New Zealand)            | Children (18 years)              | roads, air pollution, ethnicity, gender, birth outcomes, parents' occupation, parents' education, parents' smoking status, antibiotic use, number of siblings, mesh block size and birth order | <p><i>Vegetation diversity</i> (lifetime)<br/> aOR<sub>asthma</sub> (95% CI)=0.933 (0.885; 0.985)</p>                                                                                                                                                                                                                                                                                                                                                                                                                                                                                                                                                                                                                                                                                                                                                                                | ↓↓ asthma                                                |
| Lai, et al. <sup>111</sup> , 2018 (USA)                       | Children (average 8.1 years old) | age, gender, ethnicity, and season                                                                                                                                                             | <p><i>Classroom microbial diversity</i><br/> aOR<sub>asthma symptoms</sub> (95% CI)=1.07 (1.00; 1.14)</p> <p><i>Home microbial diversity</i><br/> aOR<sub>asthma symptoms</sub> (95% CI)= 1.00 (1.00; 1.00)</p>                                                                                                                                                                                                                                                                                                                                                                                                                                                                                                                                                                                                                                                                      | ↑↑ asthma                                                |
| Loo, et al. <sup>112</sup> , 2018 (Singapore)                 | Children (3-60 months)           | --                                                                                                                                                                                             | no significant difference in Shannon or Simpson's diversity indices of bed, play area and sofa dust samples of the allergic subjects and non-allergic subjects                                                                                                                                                                                                                                                                                                                                                                                                                                                                                                                                                                                                                                                                                                                       | no evidence of effect: allergic sensitization            |
| O'Connor, et al. <sup>31</sup> , 2018 (USA)                   | Children (3 and 7 years)         | gender, race, maternal asthma, and maternal Perceived Stress Scale score                                                                                                                       | Bacterial $\alpha$ - and $\beta$ -diversity did not differ significantly between the homes of children that did or did not develop asthma, nor did these diversity measures differ between the homes of the children that did or did not develop atopy at age 7                                                                                                                                                                                                                                                                                                                                                                                                                                                                                                                                                                                                                      | no evidence of effect: asthma and allergic sensitization |
| Pekkanen, et al. <sup>113</sup> , 2018 (7 European countries) | Adults (29–55 years)             | age, sex, parental allergy, current smoking and household density                                                                                                                              | <p><i>Band L3B49_8</i> (2<sup>nd</sup> tertile):<br/> aOR<sub>asthma</sub> (95% CI)=2.499 (1.455; 4.291)</p> <p><i>Band L3B53_7</i> (2<sup>nd</sup> tertile):</p>                                                                                                                                                                                                                                                                                                                                                                                                                                                                                                                                                                                                                                                                                                                    | ↑↑ asthma                                                |

|                                                               |                       |                                                                                                                                                                                                                                                                                                                                                                                                                                                                                                  |                                                                                                                                                                                                                                |                                                          |
|---------------------------------------------------------------|-----------------------|--------------------------------------------------------------------------------------------------------------------------------------------------------------------------------------------------------------------------------------------------------------------------------------------------------------------------------------------------------------------------------------------------------------------------------------------------------------------------------------------------|--------------------------------------------------------------------------------------------------------------------------------------------------------------------------------------------------------------------------------|----------------------------------------------------------|
|                                                               |                       |                                                                                                                                                                                                                                                                                                                                                                                                                                                                                                  | aOR <sub>asthma</sub> (95% CI)=2.206 (1.214; 4.007)                                                                                                                                                                            |                                                          |
|                                                               |                       |                                                                                                                                                                                                                                                                                                                                                                                                                                                                                                  | <i>Band L3B57_6 (2<sup>nd</sup> tertile):</i><br>aOR <sub>asthma</sub> (95% CI)=2.399 (1.378; 4.178) 3 <sup>rd</sup> tertile: aOR <sub>asthma</sub> (95% CI)=2.319 (1.299; 4.140)                                              |                                                          |
|                                                               |                       |                                                                                                                                                                                                                                                                                                                                                                                                                                                                                                  | <i>Band L3B71_9 (2<sup>nd</sup> tertile):</i><br>aOR <sub>asthma</sub> (95% CI)=2.197 (1.214; 3.974)                                                                                                                           |                                                          |
| Valkonen, et al. <sup>114</sup> , 2018 (7 European countries) | Adults (29–55 years)  | parental allergy, smoking status, household density, gender, age, and center follow-up time, study cohort, living on a farm, and well-known risk factors for asthma                                                                                                                                                                                                                                                                                                                              | No significant associations were observed between microbial species and asthma and allergic sensitization                                                                                                                      | no evidence of effect: asthma and allergic sensitization |
| Karvonen <sup>19</sup> , 2019 (Finland)                       | Children (10.5 years) | (maternal history of allergic diseases, sex, number of older siblings, and smoking during pregnancy)                                                                                                                                                                                                                                                                                                                                                                                             | <i>Bacterial richness:</i><br>aOR <sub>ever asthma</sub> (95% CI)=0.61 (0.39; 0.95)<br>aOR <sub>current asthma</sub> (95% CI)=0.55 (0.37; 1.12)                                                                                | ↑↑ ever asthma (bacterial richness)                      |
|                                                               |                       | living on a farm, cohort, gender, the maternal history of allergic diseases, number of older siblings and smoking during pregnancy. For FaRMI - paternal history of atopic diseases and asthma, maternal and paternal education levels, birth weight, mode of delivery, indoor exposure to dog and/or cat at the age of 2 months, distance to farm, breastfeeding, consumption of farm milk, day-care attendance, regular exposure to passive tobacco smoke at the age of 1 year, house type and | <i>Shannon diversity index:</i><br>aOR <sub>ever asthma</sub> (95% CI)=0.77 (0.55; 1.07)<br>aOR <sub>current asthma</sub> (95% CI)=0.76 (0.45; 1.30)                                                                           |                                                          |
| Kirjavainen, et al. <sup>13</sup> , 2019 (Finland)            | Children (6 years)    |                                                                                                                                                                                                                                                                                                                                                                                                                                                                                                  | farm-like relative abundance of bacteria/archaea:<br>aOR <sub>ever asthma</sub> (95% CI)=0.40 (0.19; 0.82)<br>aOR <sub>ever asthma</sub> (95% CI)=0.47 (0.27; 0.81)<br>aOR <sub>active asthma</sub> (95% CI)=0.48 (0.23; 0.98) | ↑↑ asthma                                                |

|                                                               |                           |                                                                                                                                                                                       |                                                                                                                                                                                                                                                                                                                                                                                                                                                                                                                                                                                                                                                                                                                                                                                                                                |                                                                                                                                                                                                                             |
|---------------------------------------------------------------|---------------------------|---------------------------------------------------------------------------------------------------------------------------------------------------------------------------------------|--------------------------------------------------------------------------------------------------------------------------------------------------------------------------------------------------------------------------------------------------------------------------------------------------------------------------------------------------------------------------------------------------------------------------------------------------------------------------------------------------------------------------------------------------------------------------------------------------------------------------------------------------------------------------------------------------------------------------------------------------------------------------------------------------------------------------------|-----------------------------------------------------------------------------------------------------------------------------------------------------------------------------------------------------------------------------|
|                                                               |                           | age, season, type of vacuumed floor and time from last vacuuming with reference to dust sampling                                                                                      |                                                                                                                                                                                                                                                                                                                                                                                                                                                                                                                                                                                                                                                                                                                                                                                                                                |                                                                                                                                                                                                                             |
| Cavaleiro Rufo, et al. <sup>115</sup> , 2020 (Portugal)       | Children (8-10 years)     | age (in years), sex, school, classroom, and maternal education, allergic sensitization status and diagnosis of asthma                                                                 | <i>School SRI</i><br>aOR <sub>asthma</sub> – functional criteria (95% CI)= 0.998 (0.992; 1.005)<br>aOR <sub>asthma</sub> – diagnosed by physician (95% CI)=1.004 (0.998; 1.011)<br>aOR <sub>asthma</sub> – clinical criteria (95% CI)=1.000 (0.992; 1.007)                                                                                                                                                                                                                                                                                                                                                                                                                                                                                                                                                                     | ↕ asthma                                                                                                                                                                                                                    |
| Fu, et al. <sup>116</sup> , 2020 (Malaysia)                   | Children (14-16 years)    | gender, race, smoking, and parental asthma/allergy                                                                                                                                    | <i>Number of OTUs</i><br>OR <sub>asthma severity</sub> (95% CI)=1.00 (0.99; 1.01)                                                                                                                                                                                                                                                                                                                                                                                                                                                                                                                                                                                                                                                                                                                                              | ↑ asthma                                                                                                                                                                                                                    |
| Gangneux, et al. <sup>117</sup> , 2020 (France)               | Children and adults       | --                                                                                                                                                                                    | <i>Shannon index</i><br>asthma group (mean±SD): 3.94±0.22 control group: 3.68±0.67, <i>p</i> =0.5393).                                                                                                                                                                                                                                                                                                                                                                                                                                                                                                                                                                                                                                                                                                                         | ↑ asthma                                                                                                                                                                                                                    |
| Adams, et al. <sup>118</sup> , 2021 (Finland and Netherlands) | Children (≈ 9 years)      | gender, age, and moisture damage in the home, educational level                                                                                                                       | <i>Bacterial richness and diversity</i><br>Middle category:<br>aOR <sub>symptoms score</sub> (95% CI)=1.43 (1.36; 1.50)<br>Highest category<br>aOR <sub>symptoms score</sub> (95% CI)= 1.26 (1.09; 1.46)                                                                                                                                                                                                                                                                                                                                                                                                                                                                                                                                                                                                                       | ↑↑ asthma                                                                                                                                                                                                                   |
| Cavaleiro Rufo, et al. <sup>119</sup> , 2021 (Portugal)       | Children (4 and 7 years)  | distance to the nearest major road, motorway or highway, sex, household crowding, maternal education, neighborhood socioeconomic deprivation and maternal history of diagnosed asthma | OR <sub>asthma at the age of 7</sub> (95% CI)=3.58 (1.09; 11.79)<br>OR <sub>allergic sensitization at the age of 4</sub> (95% CI)=2.00 (1.04; 3.86)<br>OR <sub>allergic sensitization at the age of 7</sub> (95% CI)=2.35 (1.20; 4.63)<br><br>Highest tertile of SRI:<br>OR <sub>asthma at the age of 7</sub> (95% CI)=2.28 (0.67; 7.64)<br>OR <sub>wheezing at the age of 7</sub> (95% CI)=2.51 (1.08; 5.88)                                                                                                                                                                                                                                                                                                                                                                                                                  | ↑↑ asthma, allergic sensitization and wheezing                                                                                                                                                                              |
| Cox, et al. <sup>120</sup> , 2021 (USA)                       | Children (7 and 12 years) | race (Black or non-Black), pets, neighborhood socioeconomic status, cockroaches, dust mites, and rodents                                                                              | <i>Bacteria associated with the absence of the health outcomes</i><br>OR <sub>asthma at 7 years</sub> (95% CI)=0.76 (0.64; 0.91)<br>OR <sub>asthma at 12 years</sub> (95% CI)=0.91 (0.81; 1.01)<br>OR <sub>wheeze at 7 years</sub> (95% CI)=0.84 (0.73; 0.96)<br>OR <sub>wheeze at 12 years</sub> (95% CI)=0.84 (0.69; 1.03)<br>OR <sub>allergic sensitization at 7 years</sub> (95% CI)=0.93 (0.87; 1.00)<br>OR <sub>allergic sensitization at 12 years</sub> (95% CI)=0.91 (0.83; 1.00)<br><br><i>Bacteria associated with the presence of the health outcomes</i><br>OR <sub>asthma at 7 years</sub> (95% CI)=1.06 (0.97; 1.15)<br>OR <sub>asthma at 12 years</sub> (95% CI)=1.16 (1.04; 1.30)<br>OR <sub>wheeze at 7 years</sub> (95% CI)=1.31 (1.15; 1.49)<br>OR <sub>wheeze at 12 years</sub> (95% CI)=1.17 (1.05; 1.31) | ↓↓ asthma and wheezing at 7 years<br>↓ allergic sensitization (bacteria associated with the absence of the health outcomes)<br><br>↑↑ asthma at 12 years, wheezing and allergic sensitization (bacteria associated with the |

|                                                                |                                |                                                                                                                                                                                                                                                                                              |                                                                                                                                                                                                                                                                                                                                                                                                                                                                                                                                                                                                                                                                                                                                                                                                                                                                                                                                                                                                                                                                                                                                           |                                                                                                                                                                                            |
|----------------------------------------------------------------|--------------------------------|----------------------------------------------------------------------------------------------------------------------------------------------------------------------------------------------------------------------------------------------------------------------------------------------|-------------------------------------------------------------------------------------------------------------------------------------------------------------------------------------------------------------------------------------------------------------------------------------------------------------------------------------------------------------------------------------------------------------------------------------------------------------------------------------------------------------------------------------------------------------------------------------------------------------------------------------------------------------------------------------------------------------------------------------------------------------------------------------------------------------------------------------------------------------------------------------------------------------------------------------------------------------------------------------------------------------------------------------------------------------------------------------------------------------------------------------------|--------------------------------------------------------------------------------------------------------------------------------------------------------------------------------------------|
|                                                                |                                |                                                                                                                                                                                                                                                                                              | OR <sub>allergic sensitization at 7 years</sub> (95% CI)=1.13 (1.05; 1.22)<br>OR <sub>allergic sensitization at 12 years</sub> (95% CI)=1.18 (1.04; 1.34)                                                                                                                                                                                                                                                                                                                                                                                                                                                                                                                                                                                                                                                                                                                                                                                                                                                                                                                                                                                 | presence of the health outcomes)                                                                                                                                                           |
| Donovan, et al. <sup>121</sup> , 2021 (USA)                    | Adults                         | race, socioeconomic status, air pollution and proximity to roads                                                                                                                                                                                                                             | <i>Taxonomic plant diversity</i><br>$\beta_{\text{asthma}}$ (95% CI)= -0.0527 (-0.00637; -0.0417)                                                                                                                                                                                                                                                                                                                                                                                                                                                                                                                                                                                                                                                                                                                                                                                                                                                                                                                                                                                                                                         | ↓↓ asthma                                                                                                                                                                                  |
| Fu, et al. <sup>122</sup> , 2021 (China)                       | Young adults (IQR 20–23 years) | gender, smoking and parental asthma                                                                                                                                                                                                                                                          | <i>Bacterial richness</i><br>settled air dust:<br>aOR <sub>asthma symptoms</sub> (95% CI)=0.97 (0.86; 1.1)<br><br>floor dust:<br>aOR <sub>asthma symptoms</sub> (95% CI)=0.85 (0.63; 1.14)                                                                                                                                                                                                                                                                                                                                                                                                                                                                                                                                                                                                                                                                                                                                                                                                                                                                                                                                                | ↓ asthma                                                                                                                                                                                   |
| Fu, et al. <sup>123</sup> , 2021 (China)                       | Children (15-18 years)         | Current smoking, gender and parental asthma and allergies                                                                                                                                                                                                                                    | <i>Number of OTUs</i><br>$\beta_{\text{wheezing}}$ (95% CI)= -0.2525 (-0.8228; 0.3178)<br>$\beta_{\text{breathlessness}}$ (95% CI)= 0.0754 (-0.1659; 0.3167)<br>$\beta_{\text{rhinitis}}$ (95% CI)= -1.48 (-4.302; 1.342)                                                                                                                                                                                                                                                                                                                                                                                                                                                                                                                                                                                                                                                                                                                                                                                                                                                                                                                 | ↓ wheezing                                                                                                                                                                                 |
| Hyytiäinen, et al. <sup>124</sup> , 2021 (Finland and Germany) | Children (10 years)            | gender, parental atopy, number of older siblings and season of dust sampling in both cohorts; maternal education, living on a farm and cohort, and the number of different pet species indoors in LUKAS; and parental education, study center and age of the mother during delivery in LISA. | <i>Bacterial richness</i><br>LISA cohort<br>Middle tertile: aOR <sub>allergic sensitization</sub> (95% CI)=0.99 (0.62; 1.58)<br>Highest tertile: aOR <sub>allergic sensitization</sub> (95% CI)=0.71 (0.44; 1.15)<br>LUKAS cohort<br>Middle tertile: aOR <sub>allergic sensitization</sub> (95% CI)= 0.84 (0.43; 1.65)<br>Highest tertile: aOR <sub>allergic sensitization</sub> (95% CI)=1.60 (0.66; 3.87)<br><br><i>Shannon index</i><br>LISA cohort<br>Middle tertile: aOR <sub>allergic sensitization</sub> (95% CI)=0.76 (0.48; 1.20)<br>LUKAS cohort<br>Middle tertile: aOR <sub>allergic sensitization</sub> (95% CI)=1.98 (1.04; 3.78)<br><br>Rural children:<br><i>Bacterial richness</i><br>Middle tertile: aOR <sub>allergic sensitization</sub> (95% CI)=1.34 (0.57; 3.15)<br>Highest tertile: aOR <sub>allergic sensitization</sub> (95% CI)=3.63 (1.05; 12.56)<br><br><i>Shannon index</i><br>Middle tertile: aOR <sub>allergic sensitization</sub> (95% CI)=1.83 (0.84; 3.98)<br>Highest tertile: aOR <sub>allergic sensitization</sub> (95% CI)=3.86 (1.06; 14.11)<br><br>Suburban children:<br><i>Bacterial richness</i> | ↑ allergic sensitization<br><br>↑↑ allergic sensitization (rural children, bacterial richness, and Shannon index)<br><br>↓↓ allergic sensitization (suburban children, bacterial richness) |

|                                                   |                            |                                                                                                                                                                                                                                                                                                                                       |                                                                                                                                                                                                                                                                                                                                                                                                                                                                                                                                                                                                                                                                                                                                                                                                                           |                                                                                      |
|---------------------------------------------------|----------------------------|---------------------------------------------------------------------------------------------------------------------------------------------------------------------------------------------------------------------------------------------------------------------------------------------------------------------------------------|---------------------------------------------------------------------------------------------------------------------------------------------------------------------------------------------------------------------------------------------------------------------------------------------------------------------------------------------------------------------------------------------------------------------------------------------------------------------------------------------------------------------------------------------------------------------------------------------------------------------------------------------------------------------------------------------------------------------------------------------------------------------------------------------------------------------------|--------------------------------------------------------------------------------------|
|                                                   |                            |                                                                                                                                                                                                                                                                                                                                       | <p>Middle tertile: aOR<sub>allergic sensitization</sub> (95% CI)=0.09 (0.01; 0.70)<br/> Highest tertile: aOR<sub>allergic sensitization</sub> (95% CI)=0.74 (0.07; 7.92)<br/> <i>Shannon index</i><br/> Middle tertile: aOR<sub>allergic sensitization</sub> (95% CI)=0.59 (0.12; 2.90)<br/> Highest tertile: aOR<sub>allergic sensitization</sub> (95% CI)=2.09 (0.24; 18.44)</p> <p>Farm children:<br/> <i>Bacterial richness</i><br/> Middle tertile: aOR<sub>allergic sensitization</sub> (95% CI)=2.26 (0.14; 35.54)<br/> Highest tertile: aOR<sub>allergic sensitization</sub> (95% CI)=1.43 (0.11; 18.70)<br/> <i>Shannon index</i><br/> Middle tertile: aOR<sub>allergic sensitization</sub> (95% CI)=5.67 (0.4; 79.77)<br/> Highest tertile: aOR<sub>allergic sensitization</sub> (95% CI)=1.43 (0.12; 17.5)</p> |                                                                                      |
| Lehtimäki, et al. <sup>125</sup> , 2021 (Denmark) | Children (6 years)         | pet ownership, day care attendance during the first year of life, length of the breast-feeding period, exposure to passive smoking, family income, parental education, number of older siblings, home type, mode of delivery, parental diagnosis of asthma, eczema and rhinitis, and use of antibiotics during the first year of life | <p><i>Urbanized airway bacterial profile</i><br/> at 1 week: OR<sub>asthma</sub> (95% CI)=1.25 (1.01; 1.55)<br/> at 1 month: OR<sub>asthma</sub> (95% CI)=1.22 (1.00; 1.48)</p> <p><i>urbanized gut bacterial profile</i><br/> at 1 month: OR<sub>asthma</sub> (95% CI)=1.29 (1.05; 1.59)<br/> at 1 year: OR<sub>asthma</sub> (95% CI)=1.24 (1.02; 1.53)<br/> OR<sub>any allergic sensitization</sub> (95% CI)=1.28 (1.03; 1.59)<br/> OR<sub>aeroallergen sensitization</sub> (95% CI)=1.24 (0.98; 1.57)</p>                                                                                                                                                                                                                                                                                                              | <p>↑↑ asthma<br/> ↑ aeroallergen sensitization (urbanized gut bacterial profile)</p> |
| Winnicki, et al. <sup>126</sup> , 2022 (Denmark)  | Individuals born 1995–2015 | Family history of asthma, income, education, age and sex                                                                                                                                                                                                                                                                              | <p>Medium levels of the bioscore:<br/> aHR<sub>Medication and hospital diagnosis asthma</sub> (95% CI): 1.01 (0.95; 1.08)<br/> aHR<sub>Hospital diagnosis asthma</sub> (95% CI): 0.97 (0.87; 1.09)</p> <p>High levels of the bioscore:<br/> aHR<sub>Medication and hospital diagnosis asthma</sub> (95% CI): 1.13 (0.99; 1.28)<br/> aHR<sub>Hospital diagnosis asthma</sub> (95% CI): 0.72 (0.55; 0.94)</p>                                                                                                                                                                                                                                                                                                                                                                                                               | <p>↑ asthma<br/> ↓↓ asthma (hospital diagnosis, high levels of the bioscore)</p>     |
| <b><i>Inner layer biodiversity</i></b>            |                            |                                                                                                                                                                                                                                                                                                                                       |                                                                                                                                                                                                                                                                                                                                                                                                                                                                                                                                                                                                                                                                                                                                                                                                                           |                                                                                      |
| Bisgaard, et al. <sup>57</sup> , 2007 (Denmark)   | Children (5 years)         | sex, gestational age at birth, maternal smoking during the third trimester, maternal use of antibiotics                                                                                                                                                                                                                               | The prevalence of asthma was 33% in colonized children and 10% in those not colonized (OR (95% CI)=4.57 (2.18; 9.57)). No significant association was observed between colonization and allergic sensitization at 4 years (OR (95% CI)=1.28 (0.65; 2.54)).                                                                                                                                                                                                                                                                                                                                                                                                                                                                                                                                                                | <p>↑↑ asthma<br/> ↑ allergic sensitization at 4 years (colonization)</p>             |

during the third trimester, breast-feeding, lung function, bronchial responsiveness, and the presence or absence of older children at home

|                                                   |                                                                |                                                                                                                                              |                                                                                                                                                                                                                                                                                                                                                                                                                                                                                                                                                                                                                                             |                                                                                                                                                                                          |
|---------------------------------------------------|----------------------------------------------------------------|----------------------------------------------------------------------------------------------------------------------------------------------|---------------------------------------------------------------------------------------------------------------------------------------------------------------------------------------------------------------------------------------------------------------------------------------------------------------------------------------------------------------------------------------------------------------------------------------------------------------------------------------------------------------------------------------------------------------------------------------------------------------------------------------------|------------------------------------------------------------------------------------------------------------------------------------------------------------------------------------------|
| Hilty, et al. <sup>127</sup> , 2010 (Ireland)     | Children (1-17 years) and adults (37.6±18.2 – 52.9±11.1 years) | --                                                                                                                                           | <i>Species</i><br>Number of sequences of different phyla and genera were different among the groups (subjects with asthma, COPD and healthy) and considering the sample                                                                                                                                                                                                                                                                                                                                                                                                                                                                     | --                                                                                                                                                                                       |
| Bisgaard, et al. <sup>21</sup> , 2011 (Denmark)   | Children (6 years)                                             | cesarean section, mother's use of antibiotics in third trimester; solely breast feeding of the baby, or having a dog or cat at home at birth | <i>Band richness</i><br>At 1 month<br>aOR <sub>current asthma</sub> (95% CI)=0.98 (0.83, 1.16)<br>aβ <sub>specific IgE</sub> (95% CI)= -0.127 (-0.227; -0.027)<br>aβ <sub>skin prick tests</sub> (95% CI)= -0.052 (-0.1560; 0.053)<br><br>At 12 months<br>aOR <sub>current asthma</sub> (95% CI)=0.97 (0.84; 1.12)<br>aβ <sub>specific IgE</sub> (95% CI)= -0.092 (-0.184; 0.000)<br>aβ <sub>skin prick tests</sub> (95% CI)= -0.101 (-0.211; -0.010)                                                                                                                                                                                       | ↓ asthma<br>↓↓ allergic sensitization (specific IgE, skin prick tests) (band richness at 12 months of age and at 1 month (IgE))                                                          |
| Cardenas, et al. <sup>128</sup> , 2012 (Ecuador)  | Children (±10.2 months)                                        | --                                                                                                                                           | No differences were found between individuals with wheeze and healthy individuals in species richness, taxa abundances, or evenness as well as in microbial community cluster patterns (β diversity).                                                                                                                                                                                                                                                                                                                                                                                                                                       | no evidence of effect: wheezing                                                                                                                                                          |
| Marri, et al. <sup>55</sup> , 2013 (USA)          | Adults (≈ 26 years)                                            | --                                                                                                                                           | Samples from asthmatic patients were associated with significantly greater bacterial diversity compared with samples from non-asthmatic subjects                                                                                                                                                                                                                                                                                                                                                                                                                                                                                            | ↑↑ asthma                                                                                                                                                                                |
| Abrahamsson, et al. <sup>16</sup> , 2014 (Sweden) | Children (7 years)                                             | --                                                                                                                                           | <i>Shannon diversity index</i><br>At 1 week<br>Median <sub>asthmatic</sub> (IQR)=1.34 (0.95; 1.64)*<br>Median <sub>non-asthmatic</sub> (IQR)=1.60 (1.42; 1.75)*<br>Median <sub>atopic</sub> (IQR)=1.71 (1.38; 1.75)<br>Median <sub>non-atopic</sub> (IQR)=1.55 (1.42; 1.79)<br>Median <sub>healthy</sub> (IQR)=1.60 (1.42; 1.80)<br><br>At 1 month<br>Median <sub>asthmatic</sub> (IQR)=1.26 (0.92; 1.46) **<br>Median <sub>non-asthmatic</sub> (IQR)=1.58 (1.48; 2.10) **<br>Median <sub>atopic</sub> (IQR)=1.62 (1.42; 1.88)<br>Median <sub>non-atopic</sub> (IQR)=2.62 (2.22; 3.24)<br>Median <sub>healthy</sub> (IQR)=1.60 (1.42; 1.75) | ↑ (comparing median levels among asthmatic and non-asthmatic and among atopic and non-atopic individuals)<br>↓↓ asthma at 7 years of age (Shannon diversity index at 1 week and 1 month) |



|                                               |                                      |                                                                                  |                                                                                                                                                                                                                                                                                                                                                                                                                                                                                                                                                                                                                                                                                                                                                                                                                                                                                                                           |                                                                    |
|-----------------------------------------------|--------------------------------------|----------------------------------------------------------------------------------|---------------------------------------------------------------------------------------------------------------------------------------------------------------------------------------------------------------------------------------------------------------------------------------------------------------------------------------------------------------------------------------------------------------------------------------------------------------------------------------------------------------------------------------------------------------------------------------------------------------------------------------------------------------------------------------------------------------------------------------------------------------------------------------------------------------------------------------------------------------------------------------------------------------------------|--------------------------------------------------------------------|
|                                               |                                      |                                                                                  | <p>At 12 months</p> <p>Median<sub>asthmatic</sub> (IQR)=2.87 (2.26; 3.24)</p> <p>Median<sub>non-asthmatic</sub> (IQR)=2.62 (2.25; 3.24)</p> <p>Median<sub>atopic</sub> (IQR)=2.70 (2.32; 3.21)</p> <p>Median<sub>non-atopic</sub> (IQR)=2.62 (2.22; 3.24)</p> <p>Median<sub>healthy</sub> (IQR)=2.82 (2.32; 3.25)</p> <p><i>Number of bacterial OTUs</i></p> <p>At 1 week</p> <p>Median<sub>asthmatic</sub> (IQR)=15 (10; 22)</p> <p>Median<sub>non-asthmatic</sub> (IQR)=16 (13; 18)</p> <p>At 1 month</p> <p>Median<sub>asthmatic</sub> (IQR)=14 (12; 17)</p> <p>Median<sub>non-asthmatic</sub> (IQR)=18 (14-22)</p> <p>At 12 months</p> <p>Median<sub>asthmatic</sub> (IQR)=51 (40; 73)</p> <p>Median<sub>non-asthmatic</sub> (IQR)=47 (33; 59)</p> <p>*<i>p</i>=0.05, **<i>p</i>=0.007</p> <p><i>Shannon index</i></p> <p>Mean<sub>asthma</sub> (SD)=2.4</p> <p>Mean<sub>healthy individuals</sub> (SD)=3.5 (0.7)</p> |                                                                    |
| Park, et al. <sup>129</sup> , 2014 (Korea)    | Adults (53.4±17.1 to 68.9±7.2)       | --                                                                               | <p><i>Number of OTUs</i></p> <p>Mean<sub>asthma</sub> (SD)=128 (73)</p> <p>Mean<sub>healthy individuals</sub> (SD)=207 (99)</p>                                                                                                                                                                                                                                                                                                                                                                                                                                                                                                                                                                                                                                                                                                                                                                                           | ↓↓ (mean <sub>asthma</sub> < mean <sub>healthy individuals</sub> ) |
| Arrieta, et al. <sup>70</sup> , 2015 (Canada) | Children (3 years)                   | --                                                                               | Gut community composition and diversity did not differ substantially among clinical phenotypes                                                                                                                                                                                                                                                                                                                                                                                                                                                                                                                                                                                                                                                                                                                                                                                                                            | no evidence of effect: atopy and wheezing                          |
| Denner, et al. <sup>130</sup> , 2016 (USA)    | Adults (44.2±1.8 and 34.3±3.0 years) | --                                                                               | Specific species<br>Differential feature selection analysis revealed significant differences in microbial diversity between asthmatic and control brush and lavage samples                                                                                                                                                                                                                                                                                                                                                                                                                                                                                                                                                                                                                                                                                                                                                | ↑ asthma                                                           |
| Hevia, et al. <sup>131</sup> , 2016 (Spain)   | Adults (≈ 39 years)                  | --                                                                               | Specific species                                                                                                                                                                                                                                                                                                                                                                                                                                                                                                                                                                                                                                                                                                                                                                                                                                                                                                          | --                                                                 |
| Hua, et al. <sup>132</sup> , 2016 (USA)       | Adults (±45.5 years)                 | sex, age, BMI, season, time since last antibiotic use, probiotic and vitamin use | <i>Shannon index</i><br>Middle tertile<br>aOR <sub>asthma</sub> (95% CI)=1.03 (0.642; 1.64)<br>Lowest tertile                                                                                                                                                                                                                                                                                                                                                                                                                                                                                                                                                                                                                                                                                                                                                                                                             | ↑↑ asthma (richness, middle tertile)                               |

aOR<sub>asthma</sub> (95% CI)=1.35 (0.85; 2.13)

*Richness*

Middle tertile

aOR<sub>asthma</sub> (95% CI)=1.68 (1.04; 2.71)

Lowest tertile

aOR<sub>asthma</sub> (95% CI)=1.52 (0.94; 2.47)

*Chao1*

Middle tertile

aOR<sub>asthma</sub> (95% CI)=1.58 (0.99; 2.52)

Lowest tertile

aOR<sub>asthma</sub> (95% CI)=1.31 (0.82; 2.11)

|                                                                        |                                      |                                                                                       |                                                                                                                                                                                                                                                                                                                                                                                                                                                            |                                                                                                       |
|------------------------------------------------------------------------|--------------------------------------|---------------------------------------------------------------------------------------|------------------------------------------------------------------------------------------------------------------------------------------------------------------------------------------------------------------------------------------------------------------------------------------------------------------------------------------------------------------------------------------------------------------------------------------------------------|-------------------------------------------------------------------------------------------------------|
| Stiemsma, et al. <sup>71</sup> , 2016 (Canada)                         | Children (4 years)                   | antibiotic use, delivery mode, breastfeeding, sex, parental asthma, atopic dermatitis | Gut microbial community composition at 3 months or 1 year of age did not differ between asthmatics and controls                                                                                                                                                                                                                                                                                                                                            | no evidence of effect: asthma                                                                         |
| Zhang, et al. <sup>133</sup> , 2016 (UK)                               | Adults (35.4±10.3 – 47.9±10.9 years) | --                                                                                    | There were no significant differences in alpha diversity between healthy, non-severe and severe asthmatics                                                                                                                                                                                                                                                                                                                                                 | no evidence of effect: asthma                                                                         |
| Chiu, et al. <sup>134</sup> , 2017 (Taiwan)                            | Children (3-5 years)                 | age, sex, maternal atopy, passive smoking, older siblings, and household income       | Relatively lower Chao1 and Shannon indices were found in children with asthma than in the healthy controls, but these differences were not significant. However, the Chao1 and Shannon indices in the mite-sensitized children with asthma were significantly lower than those in the healthy children without mite sensitization.                                                                                                                         | no evidence of effect: asthma<br>↓↓ allergic sensitization                                            |
| Depner, et al. <sup>59</sup> , 2017 (Germany, Austria and Switzerland) | Children (12 years)                  | Farming                                                                               | There was no association of bacterial load with asthma status<br><br><i>Bacterial richness</i><br>aOR <sub>asthma</sub> in nonfarm children (95% CI)=0.76 (0.25; 2.31)                                                                                                                                                                                                                                                                                     | no evidence of effect: asthma<br>↓ asthma (nonfarm children, bacterial richness)                      |
| Li, et al. <sup>135</sup> , 2017 (China)                               | Adults (39.6±8.6 to 52.0±9.3 years)  | --                                                                                    | Comparison between the three groups (asthmatics, severe and non-severe asthma, healthy individuals) showed that there was no significant difference in species richness and bacterial diversity as assessed by the Chao, Ace, Shannon and Simpson indices.<br><br><i>Number of OTUs</i><br>Mean <sub>non-asthmatic</sub> (SD)=142.67 (30.89)<br>Mean <sub>non-severe asthma</sub> (SD)=147.13 (49.85)<br>Mean <sub>severe asthma</sub> (SD)=135.36 (57.10) | no evidence of effect: asthma<br><br>↑ (comparing mean between non-asthmatic and (non-)severe asthma) |
| Ruokolainen, et al. <sup>50</sup> , 2017 (Finnish and Russian Karelia) | Children (14-20 years)               | --                                                                                    | <i>Specific species</i>                                                                                                                                                                                                                                                                                                                                                                                                                                    | --                                                                                                    |

The profile of *Acinetobacter lwoffii* in skin samples from sensitized Finns differed from all other samples ( $R^2=0.0014$ ,  $p=0.002$ ). No significant differences were found between sensitized and healthy subjects for *Acinetobacter johnsonii*. For *Micrococcus* sp. profiles tended to differ between healthy and sensitized among the Russian subjects ( $R^2 =0.002$ ,  $p=0.043$ )

|                                                 |                              |                                                                                                                                                                                                                                                                                                                                             |                                                                                                                                                                                                                                                                                                                                                                                                                                    |                                               |
|-------------------------------------------------|------------------------------|---------------------------------------------------------------------------------------------------------------------------------------------------------------------------------------------------------------------------------------------------------------------------------------------------------------------------------------------|------------------------------------------------------------------------------------------------------------------------------------------------------------------------------------------------------------------------------------------------------------------------------------------------------------------------------------------------------------------------------------------------------------------------------------|-----------------------------------------------|
| Arrieta, et al. <sup>136</sup> , 2018 (Ecuador) | Children (5 years)           | antibiotic use during pregnancy or the first year of life, duration of antibiotic use during pregnancy or the first year of life, type of delivery, household potable water, number of respiratory tract infections during the first year of life, eosinophilia at 7 months, and number of diarrheal episodes during the first year of life | Atopic wheeze did not explain any significant changes in $\alpha$ - or $\beta$ -bacterial diversity                                                                                                                                                                                                                                                                                                                                | no evidence of effect: allergic sensitization |
| Durack, et al. <sup>137</sup> , 2018 (USA)      | Adults (28-39 years)         | --                                                                                                                                                                                                                                                                                                                                          | Faith's Phylogenetic diversity trended to be higher in allergic asthmatic adults compared to non-allergic non-asthmatics in bronchial brushing samples. No such trend was observed in comparison of the other sample types from the same individuals.<br>No significant difference in the relative abundance of specific genera were observed in any of the four samples between subjects with atopic asthma and healthy subjects. | no evidence of effect: asthma                 |
| Fazlollahi, et al. <sup>51</sup> , 2018 (USA)   | Adults ( $\approx$ 32 years) | age, sex, allergic rhinitis, last upper respiratory infection, recent antibiotic use, antihistamine use, nasal steroid use, inhaled steroid use, systemic steroid use                                                                                                                                                                       | There was a positive trend between nasal bacterial alpha diversity and asthma activity. However, these differences in phylogenetic diversity were not statistically significant.<br>Healthy controls, subjects with non-exacerbated asthma, and subjects with exacerbated asthma demonstrated distinct nasal microbiome compositions.                                                                                              | no evidence of effect: asthma                 |
| Kim, et al. <sup>138</sup> , 2018 (South Korea) | Children (6-10 years)        | --                                                                                                                                                                                                                                                                                                                                          | The number of observed OTUs and the Shannon diversity index in control group were lower than those in the asthma and remission groups, but the differences were not statistically significant                                                                                                                                                                                                                                      | no evidence of effect: asthma                 |
| Okba, et al. <sup>139</sup> , 2018 (Egypt)      | Adults (18-45 years)         | sex, age, body mass index, time since last antibiotic use, probiotic and vitamin use                                                                                                                                                                                                                                                        | Specific species<br>Atopic asthma is significantly associated with gut microbiota<br><i>Lactobacilli</i> and <i>E. coli</i>                                                                                                                                                                                                                                                                                                        | --                                            |

|                                                     |                                        |                                                                                                                                       |                                                                                                                                                                                                                                                                                                                                                                                                                                                                                                          |                                                                 |
|-----------------------------------------------------|----------------------------------------|---------------------------------------------------------------------------------------------------------------------------------------|----------------------------------------------------------------------------------------------------------------------------------------------------------------------------------------------------------------------------------------------------------------------------------------------------------------------------------------------------------------------------------------------------------------------------------------------------------------------------------------------------------|-----------------------------------------------------------------|
| Stokholm, et al. <sup>67</sup> , 2018 (Denmark)     | Children (5 years)                     | older siblings, duration of exclusive breastfeeding, hospitalization after birth, antibiotic use, and delivery mode                   | There were no significant associations between $\alpha$ -diversity (Shannon diversity and Chao1 indices) at any time point and asthma risk. Microbial populations were significantly different at 1 year in children who had asthma at age 5 compared to non-asthmatics ( $R^2 = 0.6\%$ , $p=0.003$ ).                                                                                                                                                                                                   | no evidence of effect: asthma                                   |
| Wang, et al. <sup>140</sup> , 2018 (UK)             | Adults (36-80 years)                   | --                                                                                                                                    | The $\alpha$ -diversities at the three levels (genes, MGSs and KEGG) show difference between asthma and control groups.                                                                                                                                                                                                                                                                                                                                                                                  | ↑ asthma                                                        |
| Bannier, et al. <sup>141</sup> , 2019 (Netherlands) | Children (6 years)                     | sex, breastfeeding, birth season, atopy parents, siblings, parental smoking status, day care attendance                               | At preschool age, microbial richness and Shannon index were not different between wheezers and healthy controls.                                                                                                                                                                                                                                                                                                                                                                                         | no evidence of effect: wheezing                                 |
| Espuela-Ortiz, et al. <sup>53</sup> , 2019 (USA)    | Children and young adults (6-21 years) | age, sex, or genetic ancestry between cases and controls                                                                              | <i>Shannon index</i><br>Mean <sub>asthma</sub> (SD)=2.12 (0.23)<br>Mean <sub>healthy controls</sub> (SD)=2.01 (0.24)<br><i>Pielou index</i><br>Mean <sub>asthma</sub> (SD)= 0.81 (0.04)<br>Mean <sub>healthy controls</sub> (SD)=0.79 (0.05)                                                                                                                                                                                                                                                             | ↑↑ (Mean <sub>asthma</sub> > Mean <sub>healthy controls</sub> ) |
| Lee, et al. <sup>142</sup> , 2019 (South Korea)     | Adults (18-45 years; ≥ 65 years)       | --                                                                                                                                    | Young adults:<br>Bacterial diversity was not significantly different between asthmatics and non-asthmatics<br><br>Elderly:<br>Bacterial diversity was not significantly different between asthmatics and non-asthmatics                                                                                                                                                                                                                                                                                  | no evidence of effect: asthma                                   |
| Pang, et al. <sup>143</sup> , 2019 (China)          | Adults (37-41 years)                   | --                                                                                                                                    | Eosinophilic asthma and non-eosinophilic asthma showed a significant difference on Chao1, observed species and Shannon indexes among the three groups. Compared with healthy individuals, the asthmatics showed a significant decreased diversity (observed species index), richness (Chao1 and Shannon indexes) and evenness (Pielou evenness index). As for the asthmatics, non-eosinophilic asthma showed a significant decreased diversity, richness and evenness compared with eosinophilic asthma. | ↑↑ asthma                                                       |
| Powell, et al. <sup>44</sup> , 2019 (UK)            | Children (24 months)                   | ethnicity, family history of atopy (fixed), presence of fever and the use of antibiotics in the 4 weeks prior to visit (time-varying) | Considering Bray–Curtis dissimilarities, no differences in microbiota composition were found between wheezers and non-wheezers.                                                                                                                                                                                                                                                                                                                                                                          | no evidence of effect: wheezing                                 |
| Samra, et al. <sup>144</sup> , 2019 (South Korea)   | Children (5-12 years)                  | --                                                                                                                                    | Dysbiosis among children with atopic asthma compared to the controls                                                                                                                                                                                                                                                                                                                                                                                                                                     | ↑ asthma                                                        |

|                                                                  |                                          |                                                                                                                                                                      |                                                                                                                                                                                                                                                                                                                                                                                                                                                                                                                                                                                   |                                                                                                                                                                    |
|------------------------------------------------------------------|------------------------------------------|----------------------------------------------------------------------------------------------------------------------------------------------------------------------|-----------------------------------------------------------------------------------------------------------------------------------------------------------------------------------------------------------------------------------------------------------------------------------------------------------------------------------------------------------------------------------------------------------------------------------------------------------------------------------------------------------------------------------------------------------------------------------|--------------------------------------------------------------------------------------------------------------------------------------------------------------------|
|                                                                  |                                          |                                                                                                                                                                      | <p><i>Shannon index</i> (at age 1 month)<br/>Median<sub>asthma</sub> (IQR)=1.56 (1.11; 1.90)</p> <p><i>Richness at 2000 reads</i><br/>Median<sub>asthma</sub> (IQR)=30 (25-36)</p> <p><i>Richness at 10000 reads</i><br/>Median<sub>asthma</sub> (IQR)=49 (40-57)</p>                                                                                                                                                                                                                                                                                                             |                                                                                                                                                                    |
| Thorsen, et al. <sup>15</sup> , 2019 (Denmark)                   | Children (6 years)                       | paternal asthma, older siblings, and season of birth                                                                                                                 | <p><i>β-diversity</i><br/>Bray-Curtis=2.21, <i>p</i>=0.019<br/>UniFrac=2.27, <i>p</i>=0.046</p> <p><i>Bacterial asthma score (abundance)</i><br/>aHR<sub>asthma development by 6 years</sub> (95% CI)=1.36 (1.13; 1.63)<br/>aHR<sub>transient early asthma</sub> (95% CI)=1.33 (1.04; 1.72)<br/>aHR<sub>late-onset phenotypes</sub> (95% CI)=1.92 (1.23; 3.11)<br/>aHR<sub>ever asthma</sub> (95% CI)=1.44 (1.17; 1.79)<br/>aHR<sub>current asthma at 6 years</sub> (95% CI)=1.61 (1.15; 2.30)<br/>aHR<sub>asthma and allergic sensitization</sub> (95% CI)=1.67 (1.03; 2.69)</p> | ↑↑ asthma                                                                                                                                                          |
| Al Bataineh, et al. <sup>145</sup> , 2020 (United Arab Emirates) | Children (7 years) and adults (52 years) | --                                                                                                                                                                   | <p><i>Specific species</i><br/>A significant difference of bacterial composition (Bacteroidetes, Firmicutes, Fusobacteria and Proteobacteria phyla) between asthmatic and non-asthmatic controls was found among asthmatic groups compared to healthy groups</p>                                                                                                                                                                                                                                                                                                                  | --                                                                                                                                                                 |
| Chiu, et al. <sup>146</sup> , 2020 (Taiwan)                      | Children (4-5 years)                     | --                                                                                                                                                                   | <p>In the airway microbiota, Chao1 and Shannon indices were significantly reduced in children with mite sensitization and were significantly lower in children with mite-sensitized rhinitis but not asthma than those in the healthy children without mite sensitization.</p> <p>In the stool microbiota, no difference was noted in the bacterial richness and diversity regarding the mite sensitization and its relevance to rhinitis and asthma.</p>                                                                                                                         | <p>↓↓ allergic sensitization (airway microbiota)<br/>no evidence of effect: asthma (airway and stool microbiota) and allergic sensitization (stool microbiota)</p> |
| Patrick, et al. <sup>147</sup> , 2020 (Canada)                   | Children (5 years)                       | study centre, sex, presence of older siblings, mode of delivery, birthweight, season of birth, breastfeeding, ethnicity, tobacco smoke exposure, parental atopy, and | <p><i>Chao1 index</i><br/>aOR<sub>asthma</sub> (95% CI)=0.68 (0.46; 0.99)</p>                                                                                                                                                                                                                                                                                                                                                                                                                                                                                                     | ↓↓ asthma                                                                                                                                                          |

|                                                                 |                             | exposure to environmental nitrogen dioxide                                         |                                                                                                                                                                                                                                                                                                                                                                                                                                                                                                          |                                                                                 |
|-----------------------------------------------------------------|-----------------------------|------------------------------------------------------------------------------------|----------------------------------------------------------------------------------------------------------------------------------------------------------------------------------------------------------------------------------------------------------------------------------------------------------------------------------------------------------------------------------------------------------------------------------------------------------------------------------------------------------|---------------------------------------------------------------------------------|
| Ruokolainen, et al. <sup>94</sup> , 2020 (Finland and Estonian) | Children (18 months of age) | --                                                                                 | In the skin samples from Estonia, diversity tended to be higher in sensitized children as compared to healthy children ( $p=0.028$ ). Significant differences between healthy and sensitized children were observed both in the nasal and stool samples, but only among Finnish children (MRM on Bray-Curtis: nasal: $R^2=0.02$ ; stool $R^2=0.01$ )                                                                                                                                                     | ↑↑ allergic sensitization                                                       |
| Toivonen, et al. <sup>17</sup> , 2020 (Finland)                 | Children (7 years)          | sex, household siblings, parental asthma, and child's eczema at age 13 months      | <p><i>Shannon index</i></p> <p>At 2 months<br/> Median<sub>asthma</sub> (IQR)=1.11 (0.71; 1.38)<br/> Median<sub>non-asthma</sub> (IQR)=0.92 (0.50; 1.40)</p> <p>At 13 months<br/> Median<sub>asthma</sub> (IQR)=1.29 (0.47; 2.26)<br/> Median<sub>non-asthma</sub> (IQR)=0.87 (0.45; 1.70)</p> <p>At 24 months<br/> Median<sub>asthma</sub> (IQR)=0.53 (0.29; 1.03)<br/> Median<sub>non-asthma</sub> (IQR)=0.73 (0.32; 1.31)</p>                                                                         | ↓ asthma (comparing mean value of Shannon diversity index at different moments) |
| Ham, et al. <sup>148</sup> , 2021 (South Korea)                 | Adults (49-58.44 years)     | --                                                                                 | <p>The asthma patients did not differ from the healthy individuals in terms of the <math>\alpha</math> and <math>\beta</math> diversity of the lung and gut microbiomes. Similarly, the 2 groups did not differ in terms of the relative abundance of microbiome genera or species in the sputum.</p> <p>Stool samples: the healthy individuals and asthma patients did not differ significantly in terms of <math>\alpha</math> diversity, composition, or relative abundance of genera or species.</p> | no evidence of effect: asthma                                                   |
| Niemeier-Walsh, et al. <sup>14</sup> , 2021 (USA)               | Children (12 years)         | gender, asthma status, and mother's education as a measure of socioeconomic status | <p>Sputum:</p> <p><i>Shannon index</i></p> <p>Mean<sub>asthmatics</sub> (95% CI)=3.7 (3.6; 3.8)<br/> Mean<sub>non-asthmatics</sub> (95% CI)=3.6 (3.4; 3.7)</p> <p><i>Observed ASVs (amplicon sequence variants)</i></p> <p>Mean<sub>asthmatics</sub> (95% CI)=179 (154; 204)<br/> Mean<sub>non-asthmatics</sub> (95% CI)=166 (147; 185)</p> <p><i>Phylogenetic diversity</i></p> <p>Mean<sub>asthmatics</sub> (95% CI)=8.6 (7.6; 9.6)<br/> Mean<sub>non-asthmatics</sub> (95% CI)=8.4 (7.8; 9.0)</p>     | ↑↑ (Mean <sub>asthma</sub> > Mean <sub>non-asthmatics</sub> )                   |

|                                                   |                              |                                                                                                                                                                       |                                                                                                                                                                                                                                                                                                                                                                                                                                                                                                                                                                                                                                                                                                                                                                                                                                                                                                                                                                                                                                                                                                                                                        |                                                                                                                                                                                                                                                                            |
|---------------------------------------------------|------------------------------|-----------------------------------------------------------------------------------------------------------------------------------------------------------------------|--------------------------------------------------------------------------------------------------------------------------------------------------------------------------------------------------------------------------------------------------------------------------------------------------------------------------------------------------------------------------------------------------------------------------------------------------------------------------------------------------------------------------------------------------------------------------------------------------------------------------------------------------------------------------------------------------------------------------------------------------------------------------------------------------------------------------------------------------------------------------------------------------------------------------------------------------------------------------------------------------------------------------------------------------------------------------------------------------------------------------------------------------------|----------------------------------------------------------------------------------------------------------------------------------------------------------------------------------------------------------------------------------------------------------------------------|
| Samra, et al. <sup>149</sup> , 2021 (South Korea) | Children (≈ 10 years)        | --                                                                                                                                                                    | Bacterial composition, Shannon diversity index and Faith phylogenetic diversity were higher in the allergic subjects compared to the healthy subjects                                                                                                                                                                                                                                                                                                                                                                                                                                                                                                                                                                                                                                                                                                                                                                                                                                                                                                                                                                                                  | ↓ allergic sensitization                                                                                                                                                                                                                                                   |
| Schei, et al. <sup>18</sup> , 2021 (Norway)       | Children (6 years)           | --                                                                                                                                                                    | <i>Bacterial abundance</i> (at 2 years of age)<br>OR <sub>Ever asthma at 6 years</sub> (95% CI)=1.21 (0.53; 2.78)                                                                                                                                                                                                                                                                                                                                                                                                                                                                                                                                                                                                                                                                                                                                                                                                                                                                                                                                                                                                                                      | ↑ asthma                                                                                                                                                                                                                                                                   |
| Seppo, et al. <sup>52</sup> , 2021 (USA)          | Children (3 years)           | maternal atopy, delivery mode, cat and dog exposure, infant gender, maternal and infant antibiotics                                                                   | α diversity in gut microbiome was not significantly enriched in atopic compared to non-atopic infants.                                                                                                                                                                                                                                                                                                                                                                                                                                                                                                                                                                                                                                                                                                                                                                                                                                                                                                                                                                                                                                                 | no evidence of effect: allergic sensitization                                                                                                                                                                                                                              |
| Turek, et al. <sup>150</sup> , 2021 (Australia)   | Adults (±56 years)           | --                                                                                                                                                                    | 84 OTUs were in relatively low abundance among asthmatic subjects. Results shows differences in α diversity between asthmatics and unaffected non-smoking subjects.                                                                                                                                                                                                                                                                                                                                                                                                                                                                                                                                                                                                                                                                                                                                                                                                                                                                                                                                                                                    | ↓ asthma                                                                                                                                                                                                                                                                   |
| Bar et al. <sup>151</sup> , 2022 (Poland)         | Children (6–17 years of age) | --                                                                                                                                                                    | EBC samples:<br>Asthmatic children had a higher abundance of bacterial species (Shannon diversity index, mean 3.029±0.462 vs. 2.642±0.424, <i>p</i> =0.026)                                                                                                                                                                                                                                                                                                                                                                                                                                                                                                                                                                                                                                                                                                                                                                                                                                                                                                                                                                                            | ↑↑ (Mean <sub>asthma</sub> > Mean <sub>non-asthmatics</sub> )                                                                                                                                                                                                              |
| Lee-Sarwar et al. <sup>152</sup> , 2022 (USA)     | Children (6 years)           | sex, race/ethnicity, VDAART study site, and analyses of stool samples collected at age 3-6 months were additionally adjusted for exact age at stool sample collection | Age at stool sample:<br>3-6 months<br><i>Shannon Index</i><br>Transient asthma ( <i>vs</i> no asthma): β (95% CI)=0.001 (-0.17; 0.17)<br>Active asthma ( <i>vs</i> no active asthma); β (95% CI)=-0.06 (-0.20; 0.08)<br>Early asthma ( <i>vs</i> no early asthma); β (95% CI)=-0.001 (-0.12; 0.12)<br><br><i>Faith's Phylogenetic Diversity</i><br>Transient asthma ( <i>vs</i> no asthma): β (95% CI)=0.07 (-0.19; 0.32)<br>Active asthma ( <i>vs</i> no active asthma); β (95% CI)=-0.14 (-0.35; 0.06)<br>Early asthma ( <i>vs</i> no early asthma); β (95% CI)=-0.02 (-0.19; 0.15)<br><br>1 year<br><i>Shannon Index</i><br>Transient asthma ( <i>vs</i> no asthma): β (95% CI)=-0.02 (-0.14; 0.10)<br>Active asthma ( <i>vs</i> no active asthma); β (95% CI)=-0.01 (-0.11; 0.10)<br>Early asthma ( <i>vs</i> no early asthma); β (95% CI)=-0.06 (-0.15; 0.03)<br><br><i>Faith's Phylogenetic Diversity</i><br>Transient asthma ( <i>vs</i> no asthma): β (95% CI)=-0.04 (-0.13; 0.16)<br>Active asthma ( <i>vs</i> no active asthma); β (95% CI)=0.07 (-0.10; -0.03)<br>Early asthma ( <i>vs</i> no early asthma); β (95% CI)=-0.02 (-0.19; 0.15) | ↓ asthma<br><br>↑ asthma<br><br>↑ asthma (Shannon index, transient asthma (3-6 months; active and early asthma (3 years). Faith's Phylogenetic Diversity, transient asthma (3-6 months, 3 years); active asthma (1 year, 3 years); early asthma (3 years))<br><br>↓ asthma |

|                                                |                          |                                      |                                                                                                                                                                                                                                                                                                                                                                                                                                                                                                                                           |                               |
|------------------------------------------------|--------------------------|--------------------------------------|-------------------------------------------------------------------------------------------------------------------------------------------------------------------------------------------------------------------------------------------------------------------------------------------------------------------------------------------------------------------------------------------------------------------------------------------------------------------------------------------------------------------------------------------|-------------------------------|
|                                                |                          |                                      | 3 years<br><i>Shannon Index</i><br>Transient asthma (vs no asthma); $\beta$ (95% CI)=-0.02 (-0.12; 0.07)<br>Active asthma (vs no active asthma); $\beta$ (95% CI)=0.07 (-0.02; 0.15)<br>Early asthma (vs no early asthma); $\beta$ (95% CI)=0.03 (-0.04; 0.10)<br><br><i>Faith's Phylogenetic Diversity</i><br>Transient asthma (vs no asthma); $\beta$ (95% CI)=0.05 (-0.13; 0.22)<br>Active asthma (vs no active asthma); $\beta$ (95% CI)=0.09 (-0.06; 0.25)<br>Early asthma (vs no early asthma); $\beta$ (95% CI)=0.05 (-0.07; 0.19) |                               |
| Lee-Sarwar et al. <sup>153</sup> , 2022 (USA)  | Children (6 years)       | VDAART study site                    | Fecal alpha diversity was not associated with wheeze proportion (Shannon index: Pearson $r$ =-0.12, $p$ =0.21; Simpson index: Pearson $r$ =-0.10, $p$ =0.27)                                                                                                                                                                                                                                                                                                                                                                              | ↓ wheezing                    |
| Tsai et al. <sup>154</sup> , 2022 (Taiwan)     | Children (36 months)     | --                                   | Children with atopy alone had a significantly lower Chao1 index than healthy controls ( $p$ =0.035). Higher Shannon index was present in children with atopy alone than in the healthy controls ( $p$ >0.05)                                                                                                                                                                                                                                                                                                                              | ↑ asthma                      |
| Zheng et al. <sup>155</sup> , 2022 (China)     | Children (5 to 14 years) | age, gender and body mass index      | Chao1 ( $p$ =0.025) and Simpson ( $p$ =0.024) indices showed significant differences among the three groups (non-allergic asthma, allergic asthma and healthy controls). A higher bacterial richness and a lower diversity in asthma group was observed.                                                                                                                                                                                                                                                                                  | ↓↓ asthma                     |
| Mubanga et al. <sup>156</sup> , 2023 (Sweden)  | Children (9-14 years)    | twin-pairs                           | No statistically significant evidence for differences in within-sample alpha diversity between exposure groups (Shannon: $p$ =0.59, Simpson: $p$ =0.33)                                                                                                                                                                                                                                                                                                                                                                                   | no evidence of effect: asthma |
| Thorsen et al. <sup>157</sup> , 2023 (Denmark) | Children (7 years)       | log(library size) and sequencing run | Shannon diversity index: HR (95% CI)=0.72 (0.42; 1.22)<br>Faith's phylogenetic diversity: HR (95% CI)= 1.02 (0.88; 1.18)                                                                                                                                                                                                                                                                                                                                                                                                                  | ↑ asthma                      |

\* ↓↓ significant evidence of lower risk (statistically significant,  $p$ <0.05); ↓ suggestive evidence of lower risk (trending, but  $p$ >0.05); ↓ contradictory findings; ↑ suggestive evidence of higher risk (trending, but  $p$ >0.05); ↑↑ significant evidence of higher risk (statistically significant,  $p$ <0.05); no evidence of effect (for qualitative results). Arrows represents direction and strength of evidence based on the statistical significance for each study. Some studies contributed more than one results and are represented by different colours. -- covariates (confounders) were not described in the article

aOR: adjusted odds ratio; COPD: Chronic Obstructive Pulmonary Disease; HR; hazard ratio; IQR: interquartile range; MRM: multiple regression on distance matrices; OTUs: operational taxonomic units; PC: principal component; PCA: principal component analysis; SD: standard deviation; SRI; species richness index; 95% CI: 95% confidence interval.



**Table S3.** Microbiota composition between cases and controls for the main phyla/genera detected or effect estimate for the main phyla/genera detected

| Reference, study year (country)                 | Sample         | (Quali)quantitative results                                                   | Taxa                            | Relative abundance (%)* |         | Effect estimate   |
|-------------------------------------------------|----------------|-------------------------------------------------------------------------------|---------------------------------|-------------------------|---------|-------------------|
|                                                 |                |                                                                               |                                 | Case                    | Control |                   |
| Bisgaard, et al. <sup>34</sup> , 2007 (Denmark) | Airway samples | quantitative (aHR (95% CI) test for wheezing and presence of bacteria)        | First wheezy episode            |                         |         |                   |
|                                                 |                |                                                                               | <i>Streptococcus pneumoniae</i> |                         |         | 1.53 (0.97; 2.40) |
|                                                 |                |                                                                               | <i>Haemophilus influenzae</i>   |                         |         | 1.27 (0.82; 1.97) |
|                                                 |                |                                                                               | <i>Moraxella catarrhalis</i>    |                         |         | 1.76 (1.08; 2.85) |
|                                                 |                |                                                                               | <i>Staphylococcus aureus</i>    |                         |         | 0.97 (0.74; 1.26) |
|                                                 |                |                                                                               | At least one                    |                         |         | 1.50 (1.08; 2.10) |
|                                                 |                |                                                                               | Persistent wheeze               |                         |         |                   |
|                                                 |                |                                                                               | <i>Streptococcus pneumoniae</i> |                         |         | 1.41 (0.65; 3.07) |
|                                                 |                |                                                                               | <i>Haemophilus influenzae</i>   |                         |         | 2.73 (1.36; 5.48) |
|                                                 |                |                                                                               | <i>Moraxella catarrhalis</i>    |                         |         | 1.53 (0.72; 3.25) |
|                                                 |                |                                                                               | <i>Staphylococcus aureus</i>    |                         |         | 1.00 (0.59; 1.68) |
|                                                 |                |                                                                               | At least one                    |                         |         | 2.01 (1.13; 3.57) |
|                                                 |                |                                                                               | Acute severe exacerbation       |                         |         |                   |
|                                                 |                |                                                                               | <i>Streptococcus pneumoniae</i> |                         |         | 2.02 (0.79; 5.17) |
|                                                 |                |                                                                               | <i>Haemophilus influenzae</i>   |                         |         | 3.78 (1.70; 8.40) |
|                                                 |                |                                                                               | <i>Moraxella catarrhalis</i>    |                         |         | 2.52 (0.92; 5.51) |
|                                                 |                |                                                                               | <i>Staphylococcus aureus</i>    |                         |         | 1.09 (0.58; 2.05) |
|                                                 |                |                                                                               | At least one                    |                         |         | 3.14 (1.57; 6.30) |
|                                                 |                |                                                                               | Hospitalization                 |                         |         |                   |
|                                                 |                |                                                                               | <i>Streptococcus pneumoniae</i> |                         |         | 2.33 (0.72; 7.54) |
| <i>Haemophilus influenzae</i>                   |                |                                                                               | 4.09 (1.65; 10.15)              |                         |         |                   |
| <i>Moraxella catarrhalis</i>                    |                |                                                                               | 2.93 (1.06; 8.11)               |                         |         |                   |
| <i>Staphylococcus aureus</i>                    |                |                                                                               | 1.32 (0.58; 2.99)               |                         |         |                   |
| At least one                                    |                |                                                                               | 3.57 (1.55; 8.23)               |                         |         |                   |
| Hilty, et al. <sup>35</sup> , 2010 (Ireland)    | Airway samples | quantitative (numbers of sequences) between asthma and healthy control groups | Phyla                           |                         |         |                   |
|                                                 |                |                                                                               | <i>Proteobacteria</i>           | 181                     | 27      |                   |



1.30 (0.61 to 2.75)<sub>asthma</sub>  
 0.211 (-0.222 to 0.645)<sub>IgE</sub>  
 -0.066 (-0.616 to 0.484)<sub>SPT</sub>

*Staphylococcaceae*

1 month:  
 1.69 (0.83 to 3.46)<sub>asthma</sub>  
 0.508 (0.059 to 0.957)<sub>IgE</sub>  
 0.183 (-0.382 to 0.748)<sub>SPT</sub>

12 months:  
 0.72 (0.16 to 3.21)<sub>asthma</sub>  
 0.146 (-0.513 to 0.805)<sub>IgE</sub>  
 0.044 (-1.004 to 1.092)<sub>SPT</sub>

Anaerobes<sup>†</sup>

1 month:  
 0.94 (0.39 to 2.26)<sub>asthma</sub>  
 -0.113 (-0.662; 0.437)<sub>IgE</sub>  
 0.002 (-0.672; 0.677)<sub>SPT</sub>

12 months:  
 1.30 (0.55; 3.07)<sub>asthma</sub>  
 0.432 (-0.093; 0.957)<sub>IgE</sub>  
 0.496 (-0.112; 1.104)<sub>SPT</sub>

| Cardenas, et al. <sup>37</sup> , 2012 (Ecuador) | Airway samples | quantitative (OR (95% CI) test for wheezing) |                     |
|-------------------------------------------------|----------------|----------------------------------------------|---------------------|
|                                                 |                | <i>Actinobacteria/Actinomyces</i>            | 1.10 (1.02; 1.20)   |
|                                                 |                | <i>Actinobacteria/Atopobium</i>              | 2.27 (1.89; 2.71)   |
|                                                 |                | <i>Actinobacteria/Corynebacterium</i>        | 25.0 (17.0; 36.7)   |
|                                                 |                | <i>Bacteroidetes/Bacteroidales</i>           | 0.55 (0.44; 0.69)   |
|                                                 |                | <i>Bacteroidetes/Flavobacteriaceae</i>       | 12.1 (7.55; 19.3)   |
|                                                 |                | <i>Bacteroidetes/Porphyromonas</i>           | 0.20 (0.15; 0.27)   |
|                                                 |                | <i>Bacteroidetes/Prevotella</i>              | 1.38 (1.27; 1.50)   |
|                                                 |                | <i>Firmicutes/Gemella</i>                    | 0.40 (0.33; 0.49)   |
|                                                 |                | <i>Firmicutes/Lachnospiraceae</i>            | 0.39 (0.30; 0.50)   |
|                                                 |                | <i>Firmicutes/Staphylococcus</i>             | 124.1 (59.0; 161.2) |
|                                                 |                | <i>Firmicutes/Veillonella</i>                | 0.59 (0.56; 0.62)   |
|                                                 |                | <i>Fusobacteria/Leptotrichia</i>             | 0.42 (0.33; 0.53)   |
|                                                 |                | <i>Proteobacteria/Haemophilus</i>            | 2.12 (1.82; 2.47)   |
|                                                 |                | <i>Proteobacteria/Moraxella</i>              | 0.79 (0.72; 0.88)   |
|                                                 |                | <i>Proteobacteria/Neisseriaceae</i>          | 1.19 (1.09; 1.30)   |

|                                                   |                |                                                                                                                                                              | <i>Proteobacteria/Pasteurellaceae</i> |            | 0.20 (0.13; 0.29) |
|---------------------------------------------------|----------------|--------------------------------------------------------------------------------------------------------------------------------------------------------------|---------------------------------------|------------|-------------------|
| Marri, et al. <sup>38</sup> , 2013 (USA)          | Airway samples | quantitative (genera median percentage (%)) between asthma and healthy control groups                                                                        | <i>Proteobacteria</i>                 | 37         | 15                |
|                                                   |                |                                                                                                                                                              | <i>Fusobacteria</i>                   | 2          | 3                 |
|                                                   |                |                                                                                                                                                              | <i>Firmicutes</i>                     | 47         | 63                |
|                                                   |                |                                                                                                                                                              | <i>Bacteroidetes</i>                  | 1          | 1                 |
|                                                   |                |                                                                                                                                                              | <i>Actinobacteria</i>                 | 10         | 14                |
|                                                   |                |                                                                                                                                                              | Unknown                               | 3          | 4                 |
| Abrahamsson, et al. <sup>39</sup> , 2014 (Sweden) | Stool samples  | quantitative (phyla mean relative abundance (%)) (1 week; 1 month; 12 months) <sup>†</sup> from infants who did or did not develop asthma at 7 years of life | <i>Actinobacteria</i>                 | 26; 48; 5  | 23; 34; 14        |
|                                                   |                |                                                                                                                                                              | <i>Proteobacteria</i>                 | 18; 12; 5  | 19; 13; 17        |
|                                                   |                |                                                                                                                                                              | <i>Bacteroidetes</i>                  | 7; 5; 12   | 14; 17; 10        |
|                                                   |                |                                                                                                                                                              | <i>Firmicutes</i>                     | 49; 34; 80 | 44; 36; 70        |
|                                                   |                |                                                                                                                                                              | <i>Verrucomicrobia</i>                | <1; <1; 2  | <1; 1; 2          |
| Park, et al. <sup>40</sup> , 2014 (Korea)         | Airway samples | quantitative (phyla mean relative abundance (%)) between asthma and healthy control groups                                                                   | <i>Firmicutes</i>                     | 59.79      | 48.37             |
|                                                   |                |                                                                                                                                                              | <i>Proteobacteria</i>                 | 35.61      | 29.02             |
|                                                   |                |                                                                                                                                                              | <i>Bacteroidetes</i>                  | 2.62       | 16.2              |
|                                                   |                |                                                                                                                                                              | <i>Actinobacteria</i>                 | 1.62       | 5.86              |
|                                                   |                |                                                                                                                                                              | <i>Fusobacteria</i>                   | 0.38       | 0.45              |
|                                                   |                |                                                                                                                                                              | <i>Cyanobacteria</i>                  | 0          | 0.45              |
|                                                   |                |                                                                                                                                                              | <i>Spirochaetes</i>                   | 0          | 0.02              |
|                                                   |                |                                                                                                                                                              | <i>Tenericutes</i>                    | 0          | 0.02              |
| Denner, et al. <sup>42</sup> , 2016 (USA)         | Airway samples | qualitative (phyla and genera mean relative abundance (%)) between asthma and healthy control groups                                                         |                                       |            |                   |

|                                                |               | (“+” and “-” are based on <i>Figure 1</i> (of the specific study) for the Relative abundance (%) of bacteria at the phylum and genera level identified in each sampling group)          |                                     |         |         |
|------------------------------------------------|---------------|-----------------------------------------------------------------------------------------------------------------------------------------------------------------------------------------|-------------------------------------|---------|---------|
|                                                |               |                                                                                                                                                                                         | <i>Proteobacteria</i>               | ++      | +       |
|                                                |               |                                                                                                                                                                                         | <i>Firmicutes</i>                   | +       | +       |
|                                                |               |                                                                                                                                                                                         | <i>Bacteroidetes</i>                | +       | ++      |
|                                                |               |                                                                                                                                                                                         | <i>Actinobacteria</i>               | +       | ++      |
|                                                |               |                                                                                                                                                                                         | <i>Lactobacilus</i>                 | ++      | +       |
|                                                |               |                                                                                                                                                                                         | <i>Prevotella</i>                   | +       | ++      |
|                                                |               |                                                                                                                                                                                         | <i>Actinomyces</i>                  | -       | ++      |
| Hevia, et al. <sup>43</sup> , 2016 (Spain)     | Stool samples | quantitative (phyla mean relative abundance (%))                                                                                                                                        |                                     |         |         |
|                                                |               |                                                                                                                                                                                         | <i>Euryarchaeota</i> <sup>⊥</sup>   | 3.70    | 0.0003  |
|                                                |               |                                                                                                                                                                                         | Other <sup>⊥</sup>                  | 6.06    | 6.62    |
|                                                |               |                                                                                                                                                                                         | <i>Acidobacteria</i> <sup>⊥</sup>   | 0       | 6.12    |
|                                                |               |                                                                                                                                                                                         | <i>Actinobacteria</i>               | 2.61    | 1.17    |
|                                                |               |                                                                                                                                                                                         | <i>Bacteroidetes</i> <sup>⊥</sup>   | 27.3    | 22.4    |
|                                                |               |                                                                                                                                                                                         | <i>Cyanobacteria</i> <sup>⊥</sup>   | 0.08    | 0.036   |
|                                                |               |                                                                                                                                                                                         | <i>Firmicutes</i> <sup>⊥</sup>      | 61.4    | 67.0    |
|                                                |               |                                                                                                                                                                                         | <i>Fusobacteria</i> <sup>⊥</sup>    | 0.003   | 0.00016 |
|                                                |               |                                                                                                                                                                                         | <i>Lentisphaerae</i> <sup>⊥</sup>   | 0.01    | 0.019   |
|                                                |               |                                                                                                                                                                                         | <i>Proteobacteria</i> <sup>⊥</sup>  | 2.13    | 1.58    |
|                                                |               |                                                                                                                                                                                         | <i>Synergistetes</i> <sup>⊥</sup>   | 0.0025  | 0.425   |
|                                                |               |                                                                                                                                                                                         | <i>Tenericutes</i> <sup>⊥</sup>     | 0.17    | 0.29    |
|                                                |               |                                                                                                                                                                                         | TM7 <sup>⊥</sup>                    | 0.00056 | 0.00097 |
|                                                |               |                                                                                                                                                                                         | <i>Verrucomicrobia</i> <sup>⊥</sup> | 0.25    | 0.415   |
|                                                |               |                                                                                                                                                                                         | Unassignable;Other <sup>⊥</sup>     | 0       | 4.14    |
|                                                |               |                                                                                                                                                                                         | Unclassified;Other <sup>⊥</sup>     | 0.044   | 0.032   |
| Stiemsma, et al. <sup>45</sup> , 2016 (Canada) | Stool samples | differentially abundant OTUs identified by Deseq2 among asthmatics (“+” and “-” are based on <i>Figure 1</i> (of the specific study) for the differentially abundant OTUs decreased and |                                     |         |         |

increased in asthmatics;  
 “+”: Log2 Fold change >0  
 (increased in the  
 respective group);  
 “-”: Log2 Fold change <0  
 (decreased in the  
 respective group))

|                                              |    |    |
|----------------------------------------------|----|----|
| 3 months                                     |    |    |
| <i>Firmicutes</i>                            | ++ | -  |
| <i>Clostridiaecae</i>                        | ++ | -  |
| <i>Clostridium neonatale</i> <sup>⊥</sup>    | ++ | -  |
| <i>Clostridiales</i>                         | -  | ++ |
| <i>Lachnospira</i> <sup>⊥</sup>              | -  | ++ |
| 1-year                                       |    |    |
| <i>RF32</i>                                  | -  | ++ |
| <i>Lachnospiraceae</i> (OTU 15) <sup>⊥</sup> | ++ | -  |
| <i>Lachnospiraceae</i> (OTU 40)              | ++ | -  |
| <i>Lachnospiraceae</i> (OTU 26) <sup>⊥</sup> | ++ | -  |
| <i>Rothia</i>                                | ++ | -  |
| <i>Veillonella</i> <sup>⊥</sup>              | ++ | -  |

Zhang, et al. <sup>46</sup>, 2016 (UK)      Airway samples      quantitative (OR (95% CI)  
 test for asthma [non-  
 severe; severe])

|                       |                    |
|-----------------------|--------------------|
| <i>Proteobacteria</i> | 2.26 (1.94; 2.64); |
|                       | 1.21 (1.03; 1.40)  |
| <i>Fusobacteria</i>   | 0.50 (0.40; 0.63); |
|                       | 0.38 (0.31; 0.48)  |
| <i>Firmicutes</i>     | 1.00 (0.87; 1.16); |
|                       | 2.15 (1.89; 2.45)  |
| <i>Bacteroidetes</i>  | 0.62 (0.54; 0.71); |
|                       | 0.62 (0.54; 0.70)  |

Chiu, et al. <sup>47</sup>, 2017 (Taiwan)      Airway samples      quantitative  
 (Phylum/Genus mean (+/-,  
 standard deviation)  
 relative abundance (%))  
 between asthma and  
 healthy control groups

|                                                 |             |             |
|-------------------------------------------------|-------------|-------------|
| <i>Bacteroidetes/Porphyromonas</i> <sup>⊥</sup> | 2.35 ± 2.20 | 2.96 ± 2.83 |
| <i>Firmicutes/Moryella</i> <sup>⊥</sup>         | 0.66 ± 1.59 | 0.57 ± 1.00 |

|                                                                        |                |                                                                                                                                                                                                                                                                                               |                                                        |              |                   |
|------------------------------------------------------------------------|----------------|-----------------------------------------------------------------------------------------------------------------------------------------------------------------------------------------------------------------------------------------------------------------------------------------------|--------------------------------------------------------|--------------|-------------------|
|                                                                        |                |                                                                                                                                                                                                                                                                                               | <i>Fusobacteria/Fusobacterium</i> <sup>†</sup>         | 4.83 ± 4.54  | 5.07 ± 5.22       |
|                                                                        |                |                                                                                                                                                                                                                                                                                               | <i>Proteobacteria/Aggregatibacter</i> <sup>†</sup>     | 0.62 ± 1.67  | 0.62 ± 1.25       |
|                                                                        |                |                                                                                                                                                                                                                                                                                               | <i>Proteobacteria/Haemophilus</i> <sup>†</sup>         | 5.26 ± 4.57  | 5.40 ± 5.54       |
|                                                                        |                |                                                                                                                                                                                                                                                                                               | <i>Proteobacteria/Neisseria</i> <sup>†</sup>           | 4.33 ± 4.84  | 2.86 ± 2.42       |
|                                                                        |                |                                                                                                                                                                                                                                                                                               | <i>Proteobacteria/Moraxella</i> <sup>†</sup>           | 0.62 ± 2.41  | 0.50 ± 1.17       |
|                                                                        |                |                                                                                                                                                                                                                                                                                               | <i>Firmicutes/Butyrivibrio</i>                         | 0.03 ± 0.07  | 0.09 ± 0.19       |
|                                                                        |                |                                                                                                                                                                                                                                                                                               | <i>Firmicutes/Parvimonas</i>                           | 0.19 ± 0.31  | 0.48 ± 0.75       |
|                                                                        |                |                                                                                                                                                                                                                                                                                               | <i>Firmicutes/Selenomonas</i>                          | 0.61 ± 0.84  | 0.57 ± 0.72       |
| Depner, et al. <sup>48</sup> , 2017 (Germany, Austria and Switzerland) | Airway samples | quantitative (OR (95% CI) test for asthma) <sup>†</sup>                                                                                                                                                                                                                                       |                                                        |              |                   |
|                                                                        |                |                                                                                                                                                                                                                                                                                               | <i>Proteobacteria</i> (nose)                           |              | 2.44 (1.07; 5.59) |
|                                                                        |                |                                                                                                                                                                                                                                                                                               | <i>Moraxella</i> (nose)                                |              | 3.78 (2.02; 7.05) |
| Li, et al. <sup>49</sup> , 2017 (China)                                | Airway samples | quantitative (class, order or family median relative abundance (%) for asthma [non-severe; severe])                                                                                                                                                                                           |                                                        |              |                   |
|                                                                        |                |                                                                                                                                                                                                                                                                                               | <i>Gammaproteobacteria</i> <sup>†</sup>                | 4.121; 5.507 | 6.152             |
|                                                                        |                |                                                                                                                                                                                                                                                                                               | <i>Enterobacteriales</i> <sup>†</sup>                  | 0; 0         | 0                 |
|                                                                        |                |                                                                                                                                                                                                                                                                                               | <i>Pseudomonadales</i> <sup>†</sup>                    | 0.029; 0.154 | 0.053             |
|                                                                        |                |                                                                                                                                                                                                                                                                                               | <i>Enterobacteriaceae</i> <sup>†</sup>                 | 0; 0         | 0                 |
|                                                                        |                |                                                                                                                                                                                                                                                                                               | <i>Porphyromonadaceae</i>                              | 3.955; 4.466 | 6.175             |
|                                                                        |                |                                                                                                                                                                                                                                                                                               | <i>Pseudomonadaceae</i> <sup>†</sup> (NSA vs. healthy) | 0.024; 0.116 | 0.032             |
| Arrieta, et al. <sup>51</sup> , 2018 (Ecuador)                         | Stool samples  | qualitative (genus relative abundance (%)) between atopic wheeze and healthy control groups ("+" and "-" are based on <i>Figure 1</i> (of the specific study) for the Log fold change of OTUs that are significantly (false discovery rate < 0.05) abundant between atopic wheeze and control |                                                        |              |                   |

subjects calculated by using DESeq2; “+”: increased in the respective group; “-”: decreased in the respective group)

|                        |    |    |
|------------------------|----|----|
| <i>Bacteroides</i>     | -  | ++ |
| <i>Bifidobacterium</i> | -  | ++ |
| <i>Veillonella</i>     | ++ | -  |

|                                           |                |                                                                                                                                                                                                                                                                                                                                                                                             |                                                                                                                                                                                                                                                                                                                                                                                                                                                                                           |                   |       |   |                    |      |   |                      |      |   |                      |       |    |                  |       |    |                        |      |   |       |      |    |  |
|-------------------------------------------|----------------|---------------------------------------------------------------------------------------------------------------------------------------------------------------------------------------------------------------------------------------------------------------------------------------------------------------------------------------------------------------------------------------------|-------------------------------------------------------------------------------------------------------------------------------------------------------------------------------------------------------------------------------------------------------------------------------------------------------------------------------------------------------------------------------------------------------------------------------------------------------------------------------------------|-------------------|-------|---|--------------------|------|---|----------------------|------|---|----------------------|-------|----|------------------|-------|----|------------------------|------|---|-------|------|----|--|
| Durack, et al. <sup>52</sup> , 2018 (USA) | Airway samples | qualitative (frequency distribution of specific genera (%) atopic asthma; atopy without asthma and healthy controls) (“+” and “-” are based on <i>Figure 4</i> (of the specific study) for the Frequency distribution of specific genera (present in at least 20% of participants for each group) for OTUs; “+”: increased in the respective group; “-”: decreased in the respective group) |                                                                                                                                                                                                                                                                                                                                                                                                                                                                                           |                   |       |   |                    |      |   |                      |      |   |                      |       |    |                  |       |    |                        |      |   |       |      |    |  |
|                                           |                |                                                                                                                                                                                                                                                                                                                                                                                             | <table border="0"> <tr> <td><i>Prevotella</i></td> <td>++; +</td> <td>-</td> </tr> <tr> <td><i>Haemophilus</i></td> <td>+; +</td> <td>-</td> </tr> <tr> <td><i>Streptococcus</i></td> <td>-; +</td> <td>+</td> </tr> <tr> <td><i>Fusobacterium</i></td> <td>++; +</td> <td>--</td> </tr> <tr> <td><i>Neisseria</i></td> <td>++; +</td> <td>--</td> </tr> <tr> <td><i>Aggregatibacter</i></td> <td>-; +</td> <td>-</td> </tr> <tr> <td>Other</td> <td>+; +</td> <td>++</td> </tr> </table> | <i>Prevotella</i> | ++; + | - | <i>Haemophilus</i> | +; + | - | <i>Streptococcus</i> | -; + | + | <i>Fusobacterium</i> | ++; + | -- | <i>Neisseria</i> | ++; + | -- | <i>Aggregatibacter</i> | -; + | - | Other | +; + | ++ |  |
| <i>Prevotella</i>                         | ++; +          | -                                                                                                                                                                                                                                                                                                                                                                                           |                                                                                                                                                                                                                                                                                                                                                                                                                                                                                           |                   |       |   |                    |      |   |                      |      |   |                      |       |    |                  |       |    |                        |      |   |       |      |    |  |
| <i>Haemophilus</i>                        | +; +           | -                                                                                                                                                                                                                                                                                                                                                                                           |                                                                                                                                                                                                                                                                                                                                                                                                                                                                                           |                   |       |   |                    |      |   |                      |      |   |                      |       |    |                  |       |    |                        |      |   |       |      |    |  |
| <i>Streptococcus</i>                      | -; +           | +                                                                                                                                                                                                                                                                                                                                                                                           |                                                                                                                                                                                                                                                                                                                                                                                                                                                                                           |                   |       |   |                    |      |   |                      |      |   |                      |       |    |                  |       |    |                        |      |   |       |      |    |  |
| <i>Fusobacterium</i>                      | ++; +          | --                                                                                                                                                                                                                                                                                                                                                                                          |                                                                                                                                                                                                                                                                                                                                                                                                                                                                                           |                   |       |   |                    |      |   |                      |      |   |                      |       |    |                  |       |    |                        |      |   |       |      |    |  |
| <i>Neisseria</i>                          | ++; +          | --                                                                                                                                                                                                                                                                                                                                                                                          |                                                                                                                                                                                                                                                                                                                                                                                                                                                                                           |                   |       |   |                    |      |   |                      |      |   |                      |       |    |                  |       |    |                        |      |   |       |      |    |  |
| <i>Aggregatibacter</i>                    | -; +           | -                                                                                                                                                                                                                                                                                                                                                                                           |                                                                                                                                                                                                                                                                                                                                                                                                                                                                                           |                   |       |   |                    |      |   |                      |      |   |                      |       |    |                  |       |    |                        |      |   |       |      |    |  |
| Other                                     | +; +           | ++                                                                                                                                                                                                                                                                                                                                                                                          |                                                                                                                                                                                                                                                                                                                                                                                                                                                                                           |                   |       |   |                    |      |   |                      |      |   |                      |       |    |                  |       |    |                        |      |   |       |      |    |  |

|                                               |                |                                                                                        |                                                                                                                                                                                                                                                                                                                                                                  |                                    |            |      |                                  |          |     |                                |            |      |                     |          |     |  |
|-----------------------------------------------|----------------|----------------------------------------------------------------------------------------|------------------------------------------------------------------------------------------------------------------------------------------------------------------------------------------------------------------------------------------------------------------------------------------------------------------------------------------------------------------|------------------------------------|------------|------|----------------------------------|----------|-----|--------------------------------|------------|------|---------------------|----------|-----|--|
| Fazlollahi, et al. <sup>53</sup> , 2018 (USA) | Airway samples | quantitative (phylum relative abundance (%) for asthma [non-exacerbated; exacerbated]) |                                                                                                                                                                                                                                                                                                                                                                  |                                    |            |      |                                  |          |     |                                |            |      |                     |          |     |  |
|                                               |                |                                                                                        | <table border="0"> <tr> <td><i>Proteobacteria</i><sup>⊥</sup></td> <td>19.4; 17.5</td> <td>10.1</td> </tr> <tr> <td><i>Fusobacteria</i><sup>⊥</sup></td> <td>0.7; 0.6</td> <td>0.4</td> </tr> <tr> <td><i>Firmicutes</i><sup>⊥</sup></td> <td>44.2; 39.6</td> <td>48.7</td> </tr> <tr> <td>Others<sup>⊥</sup></td> <td>0.6; 0.6</td> <td>0.8</td> </tr> </table> | <i>Proteobacteria</i> <sup>⊥</sup> | 19.4; 17.5 | 10.1 | <i>Fusobacteria</i> <sup>⊥</sup> | 0.7; 0.6 | 0.4 | <i>Firmicutes</i> <sup>⊥</sup> | 44.2; 39.6 | 48.7 | Others <sup>⊥</sup> | 0.6; 0.6 | 0.8 |  |
| <i>Proteobacteria</i> <sup>⊥</sup>            | 19.4; 17.5     | 10.1                                                                                   |                                                                                                                                                                                                                                                                                                                                                                  |                                    |            |      |                                  |          |     |                                |            |      |                     |          |     |  |
| <i>Fusobacteria</i> <sup>⊥</sup>              | 0.7; 0.6       | 0.4                                                                                    |                                                                                                                                                                                                                                                                                                                                                                  |                                    |            |      |                                  |          |     |                                |            |      |                     |          |     |  |
| <i>Firmicutes</i> <sup>⊥</sup>                | 44.2; 39.6     | 48.7                                                                                   |                                                                                                                                                                                                                                                                                                                                                                  |                                    |            |      |                                  |          |     |                                |            |      |                     |          |     |  |
| Others <sup>⊥</sup>                           | 0.6; 0.6       | 0.8                                                                                    |                                                                                                                                                                                                                                                                                                                                                                  |                                    |            |      |                                  |          |     |                                |            |      |                     |          |     |  |



|                                                |                |                                                                                                                                                                                                                                                                    |                                    |            |      |
|------------------------------------------------|----------------|--------------------------------------------------------------------------------------------------------------------------------------------------------------------------------------------------------------------------------------------------------------------|------------------------------------|------------|------|
| Kim, et al. <sup>54</sup> , 2018 (South Korea) | Airway samples | qualitative (phylum relative abundance (%) for asthma and healthy controls)<br>("+" and "-" are based on <i>Figure 1</i> (of the specific study) for the Phylum composition;<br>"+": increased in the respective group;<br>"-": decreased in the respective group) | <i>Bacteroidetes</i>               | 3.0; 3.5   | 1.0  |
|                                                |                |                                                                                                                                                                                                                                                                    | <i>Actinobacteria</i> <sup>⊥</sup> | 32.1; 38.2 | 39.0 |
|                                                |                |                                                                                                                                                                                                                                                                    | <i>Proteobacteria</i>              | -          | +    |
|                                                |                |                                                                                                                                                                                                                                                                    | <i>Firmicutes</i>                  | +          | -    |
|                                                |                |                                                                                                                                                                                                                                                                    | <i>Fusobacteria</i>                | +          | -    |
|                                                |                |                                                                                                                                                                                                                                                                    | <i>Bacteroidetes</i>               | +          | -    |
| Okba, et al. <sup>55</sup> , 2018 (Egypt)      | Stool samples  | quantitative (relative abundance (%) for asthma and healthy controls)                                                                                                                                                                                              | Female                             |            |      |
|                                                |                |                                                                                                                                                                                                                                                                    | <i>Lactobacilli</i> <sup>⊥</sup>   | 20         | 10   |
|                                                |                |                                                                                                                                                                                                                                                                    | <i>E. coli</i> <sup>⊥</sup>        | 87.5       | 90   |
|                                                |                |                                                                                                                                                                                                                                                                    | <i>Kelbsiella</i> <sup>⊥</sup>     | 20         | 10   |
|                                                |                |                                                                                                                                                                                                                                                                    | <i>Proteus</i> <sup>⊥</sup>        | 12.5       | 0    |
|                                                |                |                                                                                                                                                                                                                                                                    | <i>Enterobacter</i> <sup>⊥</sup>   | 15         | 30   |
|                                                |                |                                                                                                                                                                                                                                                                    | <i>Enterococci</i> <sup>⊥</sup>    | 7.5        | 0    |
|                                                |                |                                                                                                                                                                                                                                                                    | <i>Serratia</i> <sup>⊥</sup>       | 0          | 0    |
|                                                |                |                                                                                                                                                                                                                                                                    | <i>Citrobacter</i> <sup>⊥</sup>    | 5          | 0    |
|                                                |                |                                                                                                                                                                                                                                                                    | <i>Bacteroids</i> <sup>⊥</sup>     | 0          | 0    |
|                                                |                |                                                                                                                                                                                                                                                                    | <i>Providencia</i> <sup>⊥</sup>    | 2.5        | 0    |
|                                                |                |                                                                                                                                                                                                                                                                    | <i>Morganella</i> <sup>⊥</sup>     | 0          | 0    |
|                                                |                |                                                                                                                                                                                                                                                                    | <i>Pseudomonas</i> <sup>⊥</sup>    | 0          | 0    |
|                                                |                |                                                                                                                                                                                                                                                                    | <i>S. aureus</i> <sup>⊥</sup>      | 0          | 0    |
|                                                |                |                                                                                                                                                                                                                                                                    | Male                               |            |      |
|                                                |                |                                                                                                                                                                                                                                                                    | <i>Lactobacilli</i>                | 35         | 0    |
|                                                |                |                                                                                                                                                                                                                                                                    | <i>E. coli</i> <sup>⊥</sup>        | 86         | 90   |
| <i>Kelbsiella</i> <sup>⊥</sup>                 | 25             | 40                                                                                                                                                                                                                                                                 |                                    |            |      |

|                                                    |                |                                                                                                   |                                  |      |                      |
|----------------------------------------------------|----------------|---------------------------------------------------------------------------------------------------|----------------------------------|------|----------------------|
|                                                    |                |                                                                                                   | <i>Proteus</i> <sup>†</sup>      | 17.5 | 10                   |
|                                                    |                |                                                                                                   | <i>Enterobacter</i> <sup>†</sup> | 2.5  | 0                    |
|                                                    |                |                                                                                                   | <i>Enterococci</i> <sup>†</sup>  | 2.5  | 0                    |
|                                                    |                |                                                                                                   | <i>Serratia</i> <sup>†</sup>     | 2.5  | 0                    |
|                                                    |                |                                                                                                   | <i>Citrobacter</i> <sup>†</sup>  | 5    | 10                   |
|                                                    |                |                                                                                                   | <i>Bacteroids</i> <sup>†</sup>   | 5    | 0                    |
|                                                    |                |                                                                                                   | <i>Providencia</i> <sup>†</sup>  | 0    | 0                    |
|                                                    |                |                                                                                                   | <i>Morganella</i> <sup>†</sup>   | 2.5  | 0                    |
|                                                    |                |                                                                                                   | <i>Pseudomonas</i> <sup>†</sup>  | 10   | 0                    |
|                                                    |                |                                                                                                   | <i>S. aureus</i> <sup>†</sup>    | 0    | 10                   |
| Stokholm, et al. <sup>56</sup> , 2018 (Denmark)    | Stool samples  | quantitative (relative abundance (%) for asthma and healthy controls)                             |                                  |      |                      |
|                                                    |                |                                                                                                   | <i>Roseburia</i>                 | 0.27 | 0.66                 |
|                                                    |                |                                                                                                   | <i>Veillonella</i>               | 0.94 | 0.29                 |
|                                                    |                |                                                                                                   | <i>Alistipes</i>                 | 0.04 | 0.35                 |
|                                                    |                |                                                                                                   | <i>Flavonifractor</i>            | 0.05 | 0.07                 |
| Bannier, et al. <sup>58</sup> , 2019 (Netherlands) | Stool samples  | quantitative (aOR (95% CI), <i>Bifidobacterium</i> as a reference group, for asthma and wheezing) |                                  |      |                      |
|                                                    |                |                                                                                                   | Asthma                           |      |                      |
|                                                    |                |                                                                                                   | <i>Bifidobacterium-Blautia</i>   |      | 1.454 (0.707; 2.994) |
|                                                    |                |                                                                                                   | <i>Prevotella</i>                |      | 0.707 (0.276; 1.809) |
|                                                    |                |                                                                                                   | Wheezing                         |      |                      |
|                                                    |                |                                                                                                   | <i>Bifidobacterium-Blautia</i>   |      | 1.167 (0.537; 2.540) |
|                                                    |                |                                                                                                   | <i>Prevotella</i>                |      | 4.282 (0.940; 19.51) |
| Espuela-Ortiz, et al. <sup>59</sup> , 2019 (USA)   | Airway samples | quantitative (genera mean relative abundance (%) between children with and without asthma)        |                                  |      |                      |
|                                                    |                |                                                                                                   | <i>Aggregatibacter</i>           | 2.3  | 1.6                  |
|                                                    |                |                                                                                                   | <i>Atopobium</i>                 | 1.2  | 0.9                  |
|                                                    |                |                                                                                                   | <i>Streptococcus</i>             | 13.0 | 18.3                 |
|                                                    |                |                                                                                                   | <i>Veillonella</i>               | 11.1 | 8.0                  |
| Lee, et al. <sup>60</sup> , 2019 (South Korea)     | Airway samples | qualitative (young adults; elderly) between asthma and healthy control groups.                    |                                  |      |                      |

("+" and "-" are based on Figure 1 (of the specific study) for the composition of phylum between the groups;  
 "+": increased in the respective group;  
 "-": decreased in the respective group)

|                                          |                |                                                                                                                                                                                                                                                                                                                                                 | <i>Actinobacteria</i> <sup>1</sup>                        | +  | ++ | +++    |
|------------------------------------------|----------------|-------------------------------------------------------------------------------------------------------------------------------------------------------------------------------------------------------------------------------------------------------------------------------------------------------------------------------------------------|-----------------------------------------------------------|----|----|--------|
|                                          |                |                                                                                                                                                                                                                                                                                                                                                 | <i>Proteobacteria</i>                                     | ++ | +  | ++     |
| Powell, et al. <sup>62</sup> , 2019 (UK) | Airway samples | quantitative (differential abundance; wheezing) results based on the longitudinal differential abundance analysis in early-life wheeze. The sign of the difference area provides information on the direction of the abundance shift (e.g., there was an increase in the abundance of a <i>Neisseria</i> OTU over time in children with wheeze) |                                                           |    |    |        |
|                                          |                |                                                                                                                                                                                                                                                                                                                                                 | Early-life wheeze (doctor-confirmed wheeze vs. no wheeze) |    |    |        |
|                                          |                |                                                                                                                                                                                                                                                                                                                                                 | <i>OTU42 Granulicatella</i> (9-12 months)                 |    |    | -1.118 |
|                                          |                |                                                                                                                                                                                                                                                                                                                                                 | <i>OTU43 Prevotella</i> (18-24 months)                    |    |    | -1.147 |
|                                          |                |                                                                                                                                                                                                                                                                                                                                                 | <i>OTU68: Neisseria</i> (9-24 months)                     |    |    | +5.993 |
|                                          |                |                                                                                                                                                                                                                                                                                                                                                 | Early-life wheeze (recurrent wheeze vs. no wheeze)        |    |    |        |
|                                          |                |                                                                                                                                                                                                                                                                                                                                                 | <i>OTU42 Granulicatella</i> (9-24 months)                 |    |    | -4.999 |
|                                          |                |                                                                                                                                                                                                                                                                                                                                                 | <i>OTU43 Prevotella</i> (18-24 months)                    |    |    | -2.637 |
|                                          |                |                                                                                                                                                                                                                                                                                                                                                 | <i>OTU68 Neisseria</i> (12-24 months)                     |    |    | +3.581 |

|                                                                 |                |                                                                                            | <i>OTU76 Prevotella</i> (12-24 months)   | -2.090          |
|-----------------------------------------------------------------|----------------|--------------------------------------------------------------------------------------------|------------------------------------------|-----------------|
| Samra, et al. <sup>63</sup> , 2019 (South Korea)                | Urine samples  | quantitative (mean relative abundance (%) for atopic asthma and healthy control groups))   |                                          |                 |
|                                                                 |                |                                                                                            | <i>Micrococcaceae</i>                    | 6.39 1.72       |
|                                                                 |                |                                                                                            | <i>Micrococcaceae(f)</i>                 | 4.59 0.93       |
|                                                                 |                |                                                                                            | <i>Propionibacteriaceae</i> <sup>⊥</sup> | 1.70 0.87       |
|                                                                 |                |                                                                                            | <i>Propionibacterium</i> <sup>⊥</sup>    | 1.70 0.86       |
|                                                                 |                |                                                                                            | <i>Methylobacteriaceae</i>               | 9.59 1.12       |
|                                                                 |                |                                                                                            | <i>Methylobacteriaceae(f)</i>            | 1.74 0.45       |
|                                                                 |                |                                                                                            | <i>Methylobacterium</i>                  | 7.85 0.67       |
|                                                                 |                |                                                                                            | <i>Rhizobiaceae</i> <sup>⊥</sup>         | 4.98 9.36       |
|                                                                 |                |                                                                                            | <i>Agrobacterium</i> <sup>⊥</sup>        | 4.69 8.52       |
|                                                                 |                |                                                                                            | <i>Sphingomonadaceae</i> <sup>⊥</sup>    | 15.70 11.25     |
|                                                                 |                |                                                                                            | <i>Sphingomonadaceae(f)</i>              | 1.93 0.46       |
|                                                                 |                |                                                                                            | <i>Alcaligenaceae</i> <sup>⊥</sup>       | 3.67 6.81       |
|                                                                 |                |                                                                                            | <i>Achromobacter</i> <sup>⊥</sup>        | 3.60 6.68       |
|                                                                 |                |                                                                                            | <i>Comamonadaceae</i> <sup>⊥</sup>       | 5.91 4.52       |
|                                                                 |                |                                                                                            | <i>Comamonadaceae(f)</i>                 | 1.58 0.71       |
|                                                                 |                |                                                                                            | <i>Enterobacteriaceae</i>                | 3.36 8.98       |
|                                                                 |                |                                                                                            | <i>Enterobacteriaceae(f)</i>             | 2.84 8.72       |
|                                                                 |                |                                                                                            | <i>Moraxellaceae</i> <sup>⊥</sup>        | 3.99 4.42       |
|                                                                 |                |                                                                                            | <i>Enhydrobacter</i> <sup>⊥</sup>        | 0.39 0.45       |
| Thorsen, et al. <sup>64</sup> , 2019 (Denmark)                  | Airway samples | quantitative (taxon mean relative abundance (%) between asthma and healthy control groups) |                                          |                 |
|                                                                 |                |                                                                                            | <i>Veillonella</i>                       | 4.79e-2 2.83e-2 |
|                                                                 |                |                                                                                            | <i>Prevotella</i>                        | 6.62e-3 2.65e-3 |
|                                                                 |                |                                                                                            | <i>Gemella</i>                           | 5.16e-2 3.95e-2 |
|                                                                 |                |                                                                                            | <i>Bacilli</i>                           | 7.16e-4 4.66e-4 |
|                                                                 |                |                                                                                            | <i>Bacillales</i>                        | 1.77e-3 1.61e-3 |
|                                                                 |                |                                                                                            | <i>Lactobacillus</i>                     | 1.48e-2 9.23e-3 |
|                                                                 |                |                                                                                            | <i>Streptococcus</i>                     | 3.32e-1 3.01e-1 |
|                                                                 |                |                                                                                            | <i>Neisseria</i>                         | 2.73e-2 2.15e-2 |
| Al Bataineh, et al. <sup>65</sup> , 2020 (United Arab Emirates) | Airway samples | quantitative (mean relative abundance (%) for asthma                                       |                                          |                 |

and healthy control  
groups)); sig differences

Adults

|                                        |       |      |
|----------------------------------------|-------|------|
| <i>Streptococcus</i>                   | 16.51 | 7.01 |
| <i>Granulicatella</i>                  | 0.86  | 0.56 |
| <i>Eikenella</i>                       | 0.11  | 0.21 |
| <i>Capnocytophaga</i>                  | 0.81  | 0.83 |
| <i>Pasteurellaceae_unclassified</i>    | 0.16  | 0.13 |
| <i>Enterobacteriaceae_unclassified</i> | 0.13  | 0.01 |
| <i>Escherichia</i>                     | 0     | 0.01 |
| <i>SR1_unclassified</i>                | 0.47  | 0.4  |
| <i>Cardiobacterium</i>                 | 0.03  | 0.06 |
| <i>Butyrivibrio</i>                    | 0     | 0.06 |
| <i>Peptococcus</i>                     | 0.02  | 0.06 |
| <i>Aggregatibacter</i>                 | 0     | 0.01 |
| <i>Bacteroidetes_unclassified</i>      | 0.02  | 0.11 |
| <i>Shuttleworthia</i>                  | 0.01  | 0.02 |
| <i>Lactobacillus</i>                   | 0.01  | 0.02 |
| <i>RF39_unclassified</i>               | 0.01  | 0.03 |
| <i>Bifidobacterium</i>                 | 0.01  | 0    |
| <i>Sphingobium</i>                     | 0     | 0    |

Children

|                                        |       |       |
|----------------------------------------|-------|-------|
| <i>Streptococcus</i>                   | 14.18 | 14.06 |
| <i>Granulicatella</i>                  | 0.29  | 0.76  |
| <i>Eikenella</i>                       | 0.44  | 0.37  |
| <i>Capnocytophaga</i>                  | 0.33  | 0.47  |
| <i>Pasteurellaceae_unclassified</i>    | 0.05  | 0.45  |
| <i>Enterobacteriaceae_unclassified</i> | 0.04  | 0     |
| <i>Escherichia</i>                     | 0.04  | 0     |
| <i>SR1_unclassified</i>                | 0.02  | 0.17  |
| <i>Cardiobacterium</i>                 | 0.03  | 0.03  |
| <i>Butyrivibrio</i>                    | 0     | 0.01  |
| <i>Peptococcus</i>                     | 0     | 0.01  |
| <i>Aggregatibacter</i>                 | 0.01  | 0.02  |
| <i>Bacteroidetes_unclassified</i>      | 0     | 0     |
| <i>Shuttleworthia</i>                  | 0     | 0     |
| <i>Lactobacillus</i>                   | 0     | 0.01  |
| <i>RF39_unclassified</i>               | 0     | 0.01  |
| <i>Bifidobacterium</i>                 | 0     | 0     |

---

|                                                 |                          |                                                                                                                                                                                                                                                                                                                     |                                  |      |      |
|-------------------------------------------------|--------------------------|---------------------------------------------------------------------------------------------------------------------------------------------------------------------------------------------------------------------------------------------------------------------------------------------------------------------|----------------------------------|------|------|
| Chiu, et al. <sup>66</sup> , 2020 (Taiwan)      | Airway and stool samples | qualitative (genus relative abundance (%) for asthma and healthy control groups) (“+” and “-” are based on <i>Figure 1</i> (of the specific study) for the Airway and stool microbial composition and abundance at the genus level; “+”: increased in the respective group; “-”: decreased in the respective group) | <i>Sphingobium</i>               | 0.02 | 0    |
|                                                 |                          |                                                                                                                                                                                                                                                                                                                     | Airway samples                   |      |      |
|                                                 |                          |                                                                                                                                                                                                                                                                                                                     | <i>Streptococcus</i>             | -    | +    |
|                                                 |                          |                                                                                                                                                                                                                                                                                                                     | <i>Prevotella</i>                | -    | +    |
|                                                 |                          |                                                                                                                                                                                                                                                                                                                     | <i>Fusobacterium</i>             | +    | +    |
|                                                 |                          |                                                                                                                                                                                                                                                                                                                     | <i>Neisseria</i>                 | +    | -    |
|                                                 |                          |                                                                                                                                                                                                                                                                                                                     | <i>Leptotrichia</i>              | +    | -    |
|                                                 |                          |                                                                                                                                                                                                                                                                                                                     | Others                           | +    | +    |
|                                                 |                          |                                                                                                                                                                                                                                                                                                                     | Stool samples                    |      |      |
|                                                 |                          |                                                                                                                                                                                                                                                                                                                     | <i>Streptococcus</i>             | +    | -    |
|                                                 |                          |                                                                                                                                                                                                                                                                                                                     | <i>Bifidobacterium</i>           | +    | -    |
|                                                 |                          |                                                                                                                                                                                                                                                                                                                     | <i>Blautia</i>                   | +    | +    |
|                                                 |                          |                                                                                                                                                                                                                                                                                                                     | <i>Prevotella</i>                | -    | -    |
|                                                 |                          |                                                                                                                                                                                                                                                                                                                     | <i>Faecalibacterium</i>          | -    | +    |
|                                                 |                          |                                                                                                                                                                                                                                                                                                                     | <i>Ruminococcus</i>              | +    | -    |
| <i>Coprococcus</i>                              | +                        | +                                                                                                                                                                                                                                                                                                                   |                                  |      |      |
| Others                                          | -                        | +                                                                                                                                                                                                                                                                                                                   |                                  |      |      |
| Toivonen, et al. <sup>69</sup> , 2020 (Finland) | Airway samples           | quantitative (genera mean relative abundance (%) between asthma and healthy control groups)                                                                                                                                                                                                                         |                                  |      |      |
|                                                 |                          |                                                                                                                                                                                                                                                                                                                     | <i>Haemophilus</i> (13 months)   | 0.11 | 0.04 |
|                                                 |                          |                                                                                                                                                                                                                                                                                                                     | <i>Acinetobacter</i> (13 months) | 0.01 | 0.00 |
|                                                 |                          |                                                                                                                                                                                                                                                                                                                     | <i>Alloprevotella</i> (2 months) | 0.00 | 0.00 |

|                                                   |                |                                                                                                                                                                                                                                                                                                                                                                       |                                          |                   |      |
|---------------------------------------------------|----------------|-----------------------------------------------------------------------------------------------------------------------------------------------------------------------------------------------------------------------------------------------------------------------------------------------------------------------------------------------------------------------|------------------------------------------|-------------------|------|
|                                                   |                |                                                                                                                                                                                                                                                                                                                                                                       | <i>Neisseriaceae</i> genus 1 (13 months) | 0.03              | 0.01 |
|                                                   |                |                                                                                                                                                                                                                                                                                                                                                                       | <i>Veillonella</i> (2 months)            | 0.01              | 0.01 |
| Niemeier-Walsh, et al. <sup>71</sup> , 2021 (USA) | Airway samples | qualitative (relative abundance) between asthma and healthy control groups ("+" and "-" are based on <i>Figure 5</i> (of the specific study) for the relative abundance of bacterial phyla in sputum; "+": increased in the respective group; "-": decreased in the respective group)                                                                                 |                                          |                   |      |
|                                                   |                |                                                                                                                                                                                                                                                                                                                                                                       | Bacteroidetes                            | ++                | +    |
|                                                   |                |                                                                                                                                                                                                                                                                                                                                                                       | Proteobacteria                           | +                 | ++   |
| Seppo, et al. <sup>74</sup> , 2021 (USA)          | Stool samples  | qualitative (differential bacterial features for atopic symptoms), LDA score (log 10). LDA score ranges between -4 and 4 and represents the differential bacterial features found by LefSe (linear discriminant analysis effect size) in infants who developed or did not develop atopic symptoms. Higher LDA scores indicate features more characteristic of a group |                                          |                   |      |
|                                                   |                |                                                                                                                                                                                                                                                                                                                                                                       | Who developed atopic symptoms            |                   |      |
|                                                   |                |                                                                                                                                                                                                                                                                                                                                                                       | <i>Bacteroidetes</i>                     | LDA score >4 & <5 |      |
|                                                   |                |                                                                                                                                                                                                                                                                                                                                                                       | <i>Bacteroidia</i>                       | LDA score >4 & <5 |      |
|                                                   |                |                                                                                                                                                                                                                                                                                                                                                                       | <i>Bacteroidales</i>                     | LDA score >4 & <5 |      |
|                                                   |                |                                                                                                                                                                                                                                                                                                                                                                       | <i>Bacteroides</i>                       | LDA score >4 & <5 |      |
|                                                   |                |                                                                                                                                                                                                                                                                                                                                                                       | <i>Bacteroidaceae</i>                    | LDA score >4 & <5 |      |

*Lactobacillaceae* LDA score >3 & <4  
*Lactobacillus* LDA score >3 & <4  
*Eggerthella* LDA score >3 & <4  
*Actinomycetales* LDA score >3 & <4

Who did not develop atopic symptoms

*Lachnospiraceae* LDA score > -4

|                                                |                |                                                               |                                |
|------------------------------------------------|----------------|---------------------------------------------------------------|--------------------------------|
| Turek, et al. <sup>75</sup> , 2021 (Australia) | Airway samples | Quantitative (phylum/genus relative abundance (%) for asthma) |                                |
|                                                |                |                                                               | phylum increased in asthmatics |
|                                                |                |                                                               | <i>Proteobacteria</i> 4.74     |
|                                                |                |                                                               | <i>Actinobacteria</i> 0.23     |
|                                                |                |                                                               | genus decreased in asthmatics  |
|                                                |                |                                                               | <i>Actinomyces</i> 4.29        |
|                                                |                |                                                               | <i>Selenomonas</i> 1.48        |
|                                                |                |                                                               | <i>Leptotrichia</i> 2.01       |
|                                                |                |                                                               | <i>Megasphaera</i> 0.62        |
|                                                |                |                                                               | <i>Selenomonas</i> 0.17        |
|                                                |                |                                                               | <i>Oribacterium</i> 0.09       |
|                                                |                |                                                               | <i>Actinomyces</i> 0.32        |
|                                                |                |                                                               | <i>Capnocytophaga</i> 0.33     |
|                                                |                |                                                               | <i>Prevotella</i> 0.20         |
|                                                |                |                                                               | <i>Streptococcus</i> 0.02      |
|                                                |                |                                                               | <i>Selenomonas</i> 0.08        |
|                                                |                |                                                               | <i>Unknown</i> 0.14            |
|                                                |                |                                                               | <i>Streptococcus</i> 0.02      |
|                                                |                |                                                               | <i>Prevotella</i> 0.39         |
|                                                |                |                                                               | <i>Actinomyces</i> 0.02        |
|                                                |                |                                                               | <i>Unknown</i> 0.08            |
|                                                |                |                                                               | <i>Prevotella</i> 0.05         |
|                                                |                |                                                               | <i>Prevotella</i> 0.22         |
|                                                |                |                                                               | <i>Capnocytophaga</i> 0.08     |
|                                                |                |                                                               | <i>Tannerella</i> 0.10         |

Lee-Sarwar et al. <sup>77</sup>, 2022 (USA) Stool samples quantitative (OR (95% CI) test for asthma)<sup>†</sup>

Age at stool sample (3-6 months):



|                                              |                        |                                                                              |                                              |                   |                  |
|----------------------------------------------|------------------------|------------------------------------------------------------------------------|----------------------------------------------|-------------------|------------------|
|                                              |                        |                                                                              | <i>Staphylococcus</i>                        | 0.24 (0.05; 0.75) | transient asthma |
|                                              |                        |                                                                              | <i>Bacteroides</i>                           | 0.39 (0.22; 0.70) | early asthma     |
| Lee-Sarwar et al. <sup>78</sup> , 2022 (USA) | Stool samples          | quantitative (log-fold change)                                               | Top 5 taxa positively associated with wheeze |                   |                  |
|                                              |                        |                                                                              | <i>Veillonella</i>                           | 2.1               |                  |
|                                              |                        |                                                                              | <i>Lachnospiraceae</i>                       | 2.0               |                  |
|                                              |                        |                                                                              | <i>Monoglobus</i>                            | 1.8               |                  |
|                                              |                        |                                                                              | <i>Lachnospiraceae</i> (unidentified)        | 1.5               |                  |
|                                              |                        |                                                                              | <i>Ruminococcus gnavus</i> group             | 1.3               |                  |
|                                              |                        |                                                                              | Top 5 taxa negatively associated with wheeze |                   |                  |
|                                              |                        |                                                                              | <i>Sellimonas</i>                            | -1.8              |                  |
|                                              |                        |                                                                              | <i>Fusicatenibacter</i>                      | -1.8              |                  |
|                                              |                        |                                                                              | <i>Flavonifractor</i>                        | -1.8              |                  |
|                                              |                        |                                                                              | <i>Eggerthella</i>                           | -1.7              |                  |
|                                              |                        |                                                                              | <i>Intestinimonas</i>                        | -1.5              |                  |
| Tsai et al. <sup>79</sup> , 2022 (Taiwan)    | Nasopharyngeal samples | quantitative (mean±SD (%)), atopy alone and healthy control                  | <i>Firmicutes/Enterococcus</i>               | 0.34±1.46         | 1.91±4.63        |
|                                              |                        |                                                                              | <i>Firmicutes/Bacillus</i>                   | 1.83±1.78         | 0.98±0.93        |
|                                              |                        |                                                                              | <i>Firmicutes/Ruminococcaceae</i>            | 0.54±0.95         | 0.29±0.34        |
|                                              |                        |                                                                              | <i>Actinobacteria/Rhodococcus</i>            | 1.16±4.53         | 0.09±0.16        |
|                                              |                        |                                                                              | <i>Proteobacteria/Acinetobacter</i>          | 4.98±12.39        | 0.07±0.06        |
|                                              |                        |                                                                              | <i>Proteobacteria/Moraxella</i>              | 4.24±5.96         | 1.21±1.86        |
|                                              |                        |                                                                              | <i>Proteobacteria/Alkanindiges</i>           | 0.08±0.23         | 0.36±0.68        |
|                                              |                        |                                                                              | <i>Proteobacteria/Rickettsia</i>             | 0.00±0.01         | 0.23±0.34        |
|                                              |                        |                                                                              | <i>Proteobacteria/Rhizobacter</i>            | 0.00±0.00         | 3.28±8.52        |
|                                              |                        |                                                                              | <i>Proteobacteria/Asaia</i>                  | 0.16±0.33         | 0.00±0.01        |
| Zheng et al. <sup>80</sup> , 2022 (China)    | Stool samples          | quantitative (mean±SD) for allergic and non-allergic asthma; Sig differences | Allergic asthmatic                           |                   |                  |
|                                              |                        |                                                                              | <i>Prevotella</i>                            | 1.27±5.26         | 4.19±9.41        |
|                                              |                        |                                                                              | <i>Lactobacillus</i>                         | 0.42±0.42         | 0.09±0.12        |
|                                              |                        |                                                                              | <i>Lachnospiraceae ND3007</i> group          | 0.53±0.50         | 0.79±0.28        |

|                                               |                        |                                                                                                                                                                                                                                                                                                                                                                                                     |                                     |            |            |
|-----------------------------------------------|------------------------|-----------------------------------------------------------------------------------------------------------------------------------------------------------------------------------------------------------------------------------------------------------------------------------------------------------------------------------------------------------------------------------------------------|-------------------------------------|------------|------------|
|                                               |                        |                                                                                                                                                                                                                                                                                                                                                                                                     | <i>Collinsella</i>                  | 0.54±0.88  | 0.90±0.62  |
|                                               |                        |                                                                                                                                                                                                                                                                                                                                                                                                     | <i>Terrisporobacter</i>             | 0.42±0.80  | 1.32±1.90  |
|                                               |                        |                                                                                                                                                                                                                                                                                                                                                                                                     | <i>Megamonas</i>                    | 0.15±0.17  | 0.26±0.19  |
|                                               |                        |                                                                                                                                                                                                                                                                                                                                                                                                     | <i>Eubacterium eligens group</i>    | 0.26±0.30  | 0.82±0.35  |
|                                               |                        |                                                                                                                                                                                                                                                                                                                                                                                                     | <i>CAG.56</i>                       | 0.26±0.35  | 0.38±0.27  |
|                                               |                        |                                                                                                                                                                                                                                                                                                                                                                                                     | <i>Lachnospira</i>                  | 0.30±0.54  | 0.44±0.17  |
|                                               |                        |                                                                                                                                                                                                                                                                                                                                                                                                     | Non-allergic asthmatic group        |            |            |
|                                               |                        |                                                                                                                                                                                                                                                                                                                                                                                                     | <i>Bacteroides</i>                  | 10.08±6.28 | 20.35±7.09 |
|                                               |                        |                                                                                                                                                                                                                                                                                                                                                                                                     | <i>Agathobacter</i>                 | 1.72±1.64  | 3.38±2.16  |
|                                               |                        |                                                                                                                                                                                                                                                                                                                                                                                                     | <i>CAG.352</i>                      | 1.31±1.00  | 2.82±1.61  |
|                                               |                        |                                                                                                                                                                                                                                                                                                                                                                                                     | <i>Ruminococcus</i>                 | 0.95±0.85  | 1.82±0.80  |
|                                               |                        |                                                                                                                                                                                                                                                                                                                                                                                                     | <i>Intestinibacter</i>              | 0.81±0.74  | 1.14±0.33  |
|                                               |                        |                                                                                                                                                                                                                                                                                                                                                                                                     | <i>Lachnospira</i>                  | 0.42±0.14  | 0.68±0.20  |
|                                               |                        |                                                                                                                                                                                                                                                                                                                                                                                                     | <i>Lactobacillus</i>                | 1.86±4.00  | 0.09±0.12  |
|                                               |                        |                                                                                                                                                                                                                                                                                                                                                                                                     | <i>Turcibacter</i>                  | 0.40±0.35  | 1.03±1.42  |
|                                               |                        |                                                                                                                                                                                                                                                                                                                                                                                                     | <i>Lachnospiraceae ND3007 group</i> | 0.46±0.55  | 0.79±0.28  |
|                                               |                        |                                                                                                                                                                                                                                                                                                                                                                                                     | <i>Collinsella</i>                  | 0.27±0.30  | 0.90±0.62  |
|                                               |                        |                                                                                                                                                                                                                                                                                                                                                                                                     | <i>Terrisporobacter</i>             | 0.12±0.10  | 1.32±1.90  |
|                                               |                        |                                                                                                                                                                                                                                                                                                                                                                                                     | <i>Parasutterella</i>               | 0.23±0.25  | 0.34±0.24  |
|                                               |                        |                                                                                                                                                                                                                                                                                                                                                                                                     | <i>Eubacterium eligens group</i>    | 0.18±0.14  | 0.82±0.35  |
|                                               |                        |                                                                                                                                                                                                                                                                                                                                                                                                     | <i>Lachnospira</i>                  | 0.11±0.09  | 0.44±0.17  |
| Thorsen et al. <sup>82</sup> , 2023 (Denmark) | Nasopharyngeal samples | qualitative (Cox regression of time-to-asthma, HR>1 and p>0.05; and DESeq2 analysis comparing abundance of the species between children who later developed asthma vs those who did not, Log2-fold change >0 and p>0.05); Differential abundance analysis was performed at species level using two methods: Cox regression with log-scaled species relative abundance values as predictors from the |                                     |            |            |

---

package survival and DESeq2. All p values were derived from two-sided tests

Cox regression:

*Haemophilus influenzae*

HR>1 and p<0.05

*Moraxella linolnii*

HR>1 and p<0.05

*Moraxella catarrhalis*

HR>1 and p<0.05

*Streptococcus pneumoniae*

HR>1 and p>0.05

DESeq2:

*Haemophilus influenzae*

Log2-fold change >0 and p<0.05

*Moraxella linolnii*

Log2-fold change >0 and p>0.05

*Moraxella catarrhalis*

Log2-fold change >0 and p>0.05

*Streptococcus pneumoniae*

Log2-fold change >0 and p<0.05

---

\*Taxa with significant differences ( $p<0.05$ ) between cases (individuals with asthma, allergic sensitization or wheezing) and controls (healthy individuals); † no significant differences between cases and controls; ‡ relative abundance of the main phyla and genera tested for association with asthma.

aHR: adjusted hazard ratio; LDA: linear discriminant analysis; HR: hazard ratio; OR: odds ratio; OTUs: operational taxonomic units; SD: standard deviation; 95% CI: 95% confidence interval.

**Table S4.** Summary of the evidence on the association between outer layer biodiversity and respiratory outcomes (based on information included in Table 1 "*Outer layer biodiversity*")

| <b>Evidence</b>                     | <b>Outcome</b> |                        |          |
|-------------------------------------|----------------|------------------------|----------|
|                                     | Asthma         | Allergic sensitization | Wheezing |
| Significant evidence of lower risk  | 11             | 6                      | 2        |
| Suggestive evidence of lower risk   | 3              | 5                      | 2        |
| Contradictory findings              | 4              | 2                      | 0        |
| Significant evidence of higher risk | 7              | 3                      | 2        |
| Suggestive evidence of higher risk  | 2              | 2                      | 0        |
| No evidence of effect               | 6              | 4                      | 1        |

Some studies contributed more than one result. Significant evidence of lower risk (statistically significant,  $p < 0.05$ ); suggestive evidence of lower risk (trending, but  $p > 0.05$ ); contradictory findings; significant evidence of higher risk (statistically significant,  $p < 0.05$ ); suggestive evidence of higher risk (trending, but  $p > 0.05$ ); no evidence of effect (for qualitative results).

**Table S5.** Summary of the evidence on the association between inner layer biodiversity and respiratory outcomes (based on information included in Table 1 "*Inner layer biodiversity*")

| <b>Evidence</b>                     | <b>Outcome</b> |                        |          |
|-------------------------------------|----------------|------------------------|----------|
|                                     | Asthma         | Allergic sensitization | Wheezing |
| Significant evidence of lower risk  | 5              | 2                      | 0        |
| Suggestive evidence of lower risk   | 4              | 1                      | 1        |
| Contradictory findings              | 6              | 0                      | 0        |
| Significant evidence of higher risk | 8              | 1                      | 1        |
| Suggestive evidence of higher risk  | 4              | 1                      | 0        |
| No evidence of effect               | 14             | 4                      | 3        |

Some studies contributed more than one result. Significant evidence of lower risk (statistically significant,  $p < 0.05$ ); suggestive evidence of lower risk (trending, but  $p > 0.05$ ); contradictory findings; significant evidence of higher risk (statistically significant,  $p < 0.05$ ); suggestive evidence of higher risk (trending, but  $p > 0.05$ ); no evidence of effect (for qualitative results).

## References

1. Ege MJ, Mayer M, Normand AC, Genuneit J, Cookson WO, Braun-Fahrlander C, Heederik D, Piarroux R, von Mutius E. 2011. Exposure to environmental microorganisms and childhood asthma. *The New England journal of medicine*. 364(8):701-709.
2. Ege MJ, Mayer M, Schwaiger K, Mattes J, Pershagen G, van Hage M, Scheynius A, Bauer J, von Mutius E. 2012. Environmental bacteria and childhood asthma. *Allergy*. 67(12):1565-1571.
3. Hanski I, von Hertzen L, Fyhrquist N, Koskinen K, Torppa K, Laatikainen T, Karisola P, Auvinen P, Paulin L, Mäkelä MJ, Vartiainen E, Kosunen TU, Alenius H, Haahtela T. 2012. Environmental biodiversity, human microbiota, and allergy are interrelated. *Proceedings of the National Academy of Sciences of the United States of America*. 109(21):8334-8339.
4. Lynch SV, Wood RA, Boushey H, Bacharier LB, Bloomberg GR, Kattan M, O'Connor GT, Sandel MT, Calatroni A, Matsui E, Johnson CC, Lynn H, Visness CM, Jaffee KF, Gergen PJ, Gold DR, Wright RJ, Fujimura K, Rauch M, Busse WW, Gern JE. 2014. Effects of early-life exposure to allergens and bacteria on recurrent wheeze and atopy in urban children. *The Journal of allergy and clinical immunology*. 134(3):593-601.e512.
5. Ciaccio CE, Barnes C, Kennedy K, Chan M, Portnoy J, Rosenwasser L. 2015. Home dust microbiota is disordered in homes of low-income asthmatic children. *The Journal of asthma : official journal of the Association for the Care of Asthma*. 52(9):873-880.
6. Ruokolainen L, von Hertzen L, Fyhrquist N, Laatikainen T, Lehtomäki J, Auvinen P, Karvonen AM, Hyvärinen A, Tillmann V, Niemelä O, Knip M, Haahtela T, Pekkanen J, Hanski I. 2015. Green areas around homes reduce atopic sensitization in children. *Allergy*. 70(2):195-202.
7. Valkonen M, Wouters IM, Täubel M, Rintala H, Lenters V, Vasara R, Genuneit J, Braun-Fahrlander C, Piarroux R, von Mutius E, Heederik D, Hyvärinen A. 2015. Bacterial Exposures and Associations with Atopy and Asthma in Children. *PloS one*. 10(6):e0131594.
8. Tischer C, Weigl F, Probst AJ, Standl M, Heinrich J, Pritsch K. 2016. Urban Dust Microbiome: Impact on Later Atopy and Wheezing. *Environmental health perspectives*. 124(12):1919-1923.
9. Birzele LT, Depner M, Ege MJ, Engel M, Kublik S, Bernau C, Loss GJ, Genuneit J, Horak E, Schlöter M, Braun-Fahrlander C, Danielewicz H, Heederik D, von Mutius E, Legatzki A. 2017. Environmental and mucosal microbiota and their role in childhood asthma. *Allergy*. 72(1):109-119.
10. Cavaleiro Rufo J, Madureira J, Paciência I, Aguiar L, Pereira C, Silva D, Padrão P, Moreira P, Delgado L, Annesi-Maesano I, Oliveira Fernandes E, Teixeira JP, Moreira A. 2017. Indoor fungal diversity in primary schools may differently influence allergic sensitization and asthma in children. *Pediatric allergy and immunology : official publication of the European Society of Pediatric Allergy and Immunology*. 28(4):332-339.
11. Campbell B, Raheison C, Lodge CJ, Lowe AJ, Gislason T, Heinrich J, Sunyer J, Gómez Real F, Norbäck D, Matheson MC, Wjst M, Dratva J, de Marco R, Jarvis D, Schlünssen V, Janson C, Leynaert B, Svanes C,

- Dharmage SC. 2017. The effects of growing up on a farm on adult lung function and allergic phenotypes: an international population-based study. *Thorax*. 72(3):236-244.
12. Dannemiller KC, Gent JF, Leaderer BP, Peccia J. 2016. Indoor microbial communities: Influence on asthma severity in atopic and nonatopic children. *The Journal of allergy and clinical immunology*. 138(1):76-83.e71.
  13. Karvonen AM, Hyvärinen A, Rintala H, Korppi M, Täubel M, Doekes G, Gehring U, Renz H, Pfefferle PI, Genuneit J, Keski-Nisula L, Remes S, Lampi J, von Mutius E, Pekkanen J. 2014. Quantity and diversity of environmental microbial exposure and development of asthma: a birth cohort study. *Allergy*. 69(8):1092-1101.
  14. Donovan GH, Gatzliolis D, Longley I, Douwes J. 2018. Vegetation diversity protects against childhood asthma: results from a large New Zealand birth cohort. *Nature Plants*. 4(6):358-364.
  15. Lai PS, Kolde R, Franzosa EA, Gaffin JM, Baxi SN, Sheehan WJ, Gold DR, Gevers D, Xavier RJ, Phipatanakul W. 2018. The classroom microbiome and asthma morbidity in children attending 3 inner-city schools. *The Journal of allergy and clinical immunology*. 141(6):2311-2313.
  16. Loo EXL, Chew LJM, Zulkifli AB, Ta LDH, Kuo IC, Goh A, Teoh OH, Van Bever H, Gluckman PD, Yap F, Tan KH, Chong YS, Lee BW, Shek LP. 2018. Comparison of microbiota and allergen profile in house dust from homes of allergic and non-allergic subjects- results from the GUSTO study. *The World Allergy Organization journal*. 11(1):37.
  17. O'Connor GT, Lynch SV, Bloomberg GR, Kattan M, Wood RA, Gergen PJ, Jaffee KF, Calatroni A, Bacharier LB, Beigelman A, Sandel MT, Johnson CC, Faruqi A, Santee C, Fujimura KE, Fadrosch D, Boushey H, Visness CM, Gern JE. 2018. Early-life home environment and risk of asthma among inner-city children. *The Journal of allergy and clinical immunology*. 141(4):1468-1475.
  18. Pekkanen J, Valkonen M, Täubel M, Tischer C, Leppänen H, Kärkkäinen PM, Rintala H, Zock JP, Casas L, Probst-Hensch N, Forsberg B, Holm M, Janson C, Pin I, Gislason T, Jarvis D, Heinrich J, Hyvärinen A. 2018. Indoor bacteria and asthma in adults: a multicentre case-control study within ECRHS II. *The European respiratory journal*. 51(2).
  19. Valkonen M, Täubel M, Pekkanen J, Tischer C, Rintala H, Zock JP, Casas L, Probst-Hensch N, Forsberg B, Holm M, Janson C, Pin I, Gislason T, Jarvis D, Heinrich J, Hyvärinen A. 2018. Microbial characteristics in homes of asthmatic and non-asthmatic adults in the ECRHS cohort. *Indoor air*. 28(1):16-27.
  20. Karvonen AM, Kirjavainen PV, Täubel M, Jayaprakash B, Adams RI, Sordillo JE, Gold DR, Hyvärinen A, Remes S, von Mutius E, Pekkanen J. 2019. Indoor bacterial microbiota and development of asthma by 10.5 years of age. *The Journal of allergy and clinical immunology*. 144(5):1402-1410.
  21. Kirjavainen PV, Karvonen AM, Adams RI, Täubel M, Roponen M, Tuoresmäki P, Loss G, Jayaprakash B, Depner M, Ege MJ, Renz H, Pfefferle PI, Schaub B, Lauener R, Hyvärinen A, Knight R, Heederik DJJ, von Mutius E, Pekkanen J. 2019. Farm-like indoor microbiota in non-farm homes protects children from asthma development. *Nature Medicine*. 25(7):1089-1095.
  22. Cavaleiro Rufo J, Ribeiro AI, Paciência I, Delgado L, Moreira A. 2020. The influence of species richness in primary school surroundings on children lung function and allergic disease development. *Pediatric allergy*

and immunology : official publication of the European Society of Pediatric Allergy and Immunology. 31(4):358-363.

23. Fu X, Norbäck D, Yuan Q, Li Y, Zhu X, Hashim JH, Hashim Z, Ali F, Zheng YW, Lai XX, Spangfort MD, Deng Y, Sun Y. 2020. Indoor microbiome, environmental characteristics and asthma among junior high school students in Johor Bahru, Malaysia. *Environment international*. 138:105664.

24. Gangneux JP, Sassi M, Lemire P, Le Cann P. 2020. Metagenomic Characterization of Indoor Dust Bacterial and Fungal Microbiota in Homes of Asthma and Non-asthma Patients Using Next Generation Sequencing. *Frontiers in microbiology*. 11:1671.

25. Adams RI, Leppänen H, Karvonen AM, Jacobs J, Borràs-Santos A, Valkonen M, Krop E, Haverinen-Shaughnessy U, Huttunen K, Zock JP, Hyvärinen A, Heederik D, Pekkanen J, Täubel M. 2021. Microbial exposures in moisture-damaged schools and associations with respiratory symptoms in students: A multi-country environmental exposure study. *Indoor air*. 31(6):1952-1966.

26. Cavaleiro Rufo J, Paciência I, Hoffmann E, Moreira A, Barros H, Ribeiro AI. 2021. The neighbourhood natural environment is associated with asthma in children: A birth cohort study. *Allergy*. 76(1):348-358.

27. Cox J, Stone T, Ryan P, Burkle J, Jandarov R, Mendell MJ, Niemeier-Walsh C, Reponen T. 2022. Residential bacteria and fungi identified by high-throughput sequencing and childhood respiratory health. *Environmental research*. 204(Pt D):112377.

28. Donovan GH, Landry SM, Gatzolis D. 2021. The natural environment, plant diversity, and adult asthma: A retrospective observational study using the CDC's 500 Cities Project Data. *Health & place*. 67:102494.

29. Fu X, Li Y, Meng Y, Yuan Q, Zhang Z, Wen H, Deng Y, Norbäck D, Hu Q, Zhang X, Sun Y. 2021. Derived habitats of indoor microbes are associated with asthma symptoms in Chinese university dormitories. *Environmental research*. 194:110501.

30. Fu X, Ou Z, Zhang M, Meng Y, Li Y, Wen J, Hu Q, Zhang X, Norbäck D, Deng Y, Zhao Z, Sun Y. 2021. Indoor bacterial, fungal and viral species and functional genes in urban and rural schools in Shanxi Province, China-association with asthma, rhinitis and rhinoconjunctivitis in high school students. *Microbiome*. 9(1):138.

31. Hyytiäinen H, Kirjavainen PV, Täubel M, Tuoresmäki P, Casas L, Heinrich J, Herberth G, Standl M, Renz H, Piippo-Savolainen E, Hyvärinen A, Pekkanen J, Karvonen AM. 2021. Microbial diversity in homes and the risk of allergic rhinitis and inhalant atopy in two European birth cohorts. *Environmental research*. 196:110835.

32. Lehtimäki J, Thorsen J, Rasmussen MA, Hjelmsø M, Shah S, Mortensen MS, Trivedi U, Vestergaard G, Bønnelykke K, Chawes BL, Brix S, Sørensen SJ, Bisgaard H, Stokholm J. 2021. Urbanized microbiota in infants, immune constitution, and later risk of atopic diseases. *The Journal of allergy and clinical immunology*. 148(1):234-243.

33. Winnicki MH, Dunn RR, Winther-Jensen M, Jess T, Allin KH, Bruun HH. 2022. Does childhood exposure to biodiverse greenspace reduce the risk of developing asthma? *Science of The Total Environment*. 850:157853.

34. Bisgaard H, Hermansen MN, Buchvald F, Loland L, Halkjaer LB, Bønnelykke K, Brasholt M, Heltberg A, Vissing NH, Thorsen SV, Stage M, Phipps CB. 2007. Childhood asthma after bacterial colonization of the airway in neonates. *The New England journal of medicine*. 357(15):1487-1495.
35. Hilty M, Burke C, Pedro H, Cardenas P, Bush A, Bossley C, Davies J, Ervine A, Poulter L, Pachter L, Moffatt MF, Cookson WO. 2010. Disordered microbial communities in asthmatic airways. *PloS one*. 5(1):e8578.
36. Bisgaard H, Li N, Bonnelykke K, Chawes BL, Skov T, Paludan-Müller G, Stokholm J, Smith B, Krogfelt KA. 2011. Reduced diversity of the intestinal microbiota during infancy is associated with increased risk of allergic disease at school age. *The Journal of allergy and clinical immunology*. 128(3):646-652.e641-645.
37. Cardenas PA, Cooper PJ, Cox MJ, Chico M, Arias C, Moffatt MF, Cookson WO. 2012. Upper airways microbiota in antibiotic-naïve wheezing and healthy infants from the tropics of rural Ecuador. *PloS one*. 7(10):e46803.
38. Marri PR, Stern DA, Wright AL, Billheimer D, Martinez FD. 2013. Asthma-associated differences in microbial composition of induced sputum. *The Journal of allergy and clinical immunology*. 131(2):346-352.e341-343.
39. Abrahamsson TR, Jakobsson HE, Andersson AF, Björkstén B, Engstrand L, Jenmalm MC. 2014. Low gut microbiota diversity in early infancy precedes asthma at school age. *Clinical and experimental allergy : journal of the British Society for Allergy and Clinical Immunology*. 44(6):842-850.
40. Park H, Shin JW, Park SG, Kim W. 2014. Microbial communities in the upper respiratory tract of patients with asthma and chronic obstructive pulmonary disease. *PloS one*. 9(10):e109710.
41. Arrieta M-C, Stiemsma LT, Dimitriu PA, Thorson L, Russell S, Yurist-Doutsch S, Kuzeljevic B, Gold MJ, Britton HM, Lefebvre DL, Subbarao P, Mandhane P, Becker A, McNagny KM, Sears MR, Kollmann T, null n, Mohn WW, Turvey SE, Brett Finlay B. 2015. Early infancy microbial and metabolic alterations affect risk of childhood asthma. *Science Translational Medicine*. 7(307):307ra152-307ra152.
42. Denner DR, Sangwan N, Becker JB, Hogarth DK, Oldham J, Castillo J, Sperling AI, Solway J, Naureckas ET, Gilbert JA, White SR. 2016. Corticosteroid therapy and airflow obstruction influence the bronchial microbiome, which is distinct from that of bronchoalveolar lavage in asthmatic airways. *The Journal of allergy and clinical immunology*. 137(5):1398-1405.e1393.
43. Hevia A, Milani C, López P, Donado CD, Cuervo A, González S, Suárez A, Turrioni F, Gueimonde M, Ventura M, Sánchez B, Margolles A. 2016. Allergic Patients with Long-Term Asthma Display Low Levels of *Bifidobacterium adolescentis*. *PloS one*. 11(2):e0147809.
44. Hua X, Goedert JJ, Pu A, Yu G, Shi J. 2016. Allergy associations with the adult fecal microbiota: Analysis of the American Gut Project. *EBioMedicine*. 3:172-179.
45. Stiemsma LT, Arrieta MC, Dimitriu PA, Cheng J, Thorson L, Lefebvre DL, Azad MB, Subbarao P, Mandhane P, Becker A, Sears MR, Kollmann TR, Mohn WW, Finlay BB, Turvey SE. 2016. Shifts in *Lachnospira* and *Clostridium* sp. in the 3-month stool microbiome are associated with preschool age asthma. *Clinical science (London, England : 1979)*. 130(23):2199-2207.



46. Zhang Q, Cox M, Liang Z, Brinkmann F, Cardenas PA, Duff R, Bhavsar P, Cookson W, Moffatt M, Chung KF. 2016. Airway Microbiota in Severe Asthma and Relationship to Asthma Severity and Phenotypes. *PloS one*. 11(4):e0152724.
47. Chiu C-Y, Chan Y-L, Tsai Y-S, Chen S-A, Wang C-J, Chen K-F, Chung IF. 2017. Airway Microbial Diversity is Inversely Associated with Mite-Sensitized Rhinitis and Asthma in Early Childhood. *Scientific Reports*. 7(1):1820.
48. Depner M, Ege MJ, Cox MJ, Dwyer S, Walker AW, Birzele LT, Genuneit J, Horak E, Braun-Fahrlander C, Danielewicz H, Maier RM, Moffatt MF, Cookson WO, Heederik D, von Mutius E, Legatzki A. 2017. Bacterial microbiota of the upper respiratory tract and childhood asthma. *The Journal of allergy and clinical immunology*. 139(3):826-834.e813.
49. Li N, Qiu R, Yang Z, Li J, Chung KF, Zhong N, Zhang Q. 2017. Sputum microbiota in severe asthma patients: Relationship to eosinophilic inflammation. *Respir Med*. 131:192-198.
50. Ruokolainen L, Paalanen L, Karkman A, Laatikainen T, von Hertzen L, Vlasoff T, Markelova O, Masyuk V, Auvinen P, Paulin L, Alenius H, Fyhrquist N, Hanski I, Mäkelä MJ, Zilber E, Jousilahti P, Vartiainen E, Haahtela T. 2017. Significant disparities in allergy prevalence and microbiota between the young people in Finnish and Russian Karelia. *Clinical and experimental allergy : journal of the British Society for Allergy and Clinical Immunology*. 47(5):665-674.
51. Arrieta MC, Arévalo A, Stiemsma L, Dimitriu P, Chico ME, Loo S, Vaca M, Boutin RCT, Morien E, Jin M, Turvey SE, Walter J, Parfrey LW, Cooper PJ, Finlay B. 2018. Associations between infant fungal and bacterial dysbiosis and childhood atopic wheeze in a nonindustrialized setting. *The Journal of allergy and clinical immunology*. 142(2):424-434.e410.
52. Durack J, Huang YJ, Nariya S, Christian LS, Ansel KM, Beigelman A, Castro M, Dyer A-M, Israel E, Kraft M, Martin RJ, Mauger DT, Rosenberg SR, King TS, White SR, Denlinger LC, Holguin F, Lazarus SC, Lugogo N, Peters SP, Smith LJ, Wechsler ME, Lynch SV, Boushey HA, for the National Heart L, Blood Institute's A. 2018. Bacterial biogeography of adult airways in atopic asthma. *Microbiome*. 6(1):104.
53. Fazlollahi M, Lee TD, Andrade J, Oguntuyo K, Chun Y, Grishina G, Grishin A, Bunyavanich S. 2018. The nasal microbiome in asthma. *The Journal of allergy and clinical immunology*. 142(3):834-843.e832.
54. Kim BS, Lee E, Lee MJ, Kang MJ, Yoon J, Cho HJ, Park J, Won S, Lee SY, Hong SJ. 2018. Different functional genes of upper airway microbiome associated with natural course of childhood asthma. *Allergy*. 73(3):644-652.
55. Okba AM, Saber SM, Abdel-Rehim AS, Amin MM, Mohamed DA. 2018. Fecal microbiota profile in atopic asthmatic adult patients. *European annals of allergy and clinical immunology*. 50(3):117-124.
56. Stokholm J, Blaser MJ, Thorsen J, Rasmussen MA, Waage J, Vinding RK, Schoos AM, Kunøe A, Fink NR, Chawes BL, Bønnelykke K, Brejnrod AD, Mortensen MS, Al-Soud WA, Sørensen SJ, Bisgaard H. 2018. Maturation of the gut microbiome and risk of asthma in childhood. *Nat Commun*. 9(1):141.

57. Wang Q, Li F, Liang B, Liang Y, Chen S, Mo X, Ju Y, Zhao H, Jia H, Spector TD, Xie H, Guo R. 2018. A metagenome-wide association study of gut microbiota in asthma in UK adults. *BMC Microbiology*. 18(1):114.
58. Bannier M, van Best N, Bervoets L, Savelkoul PHM, Hornef MW, van de Kant KDG, Jöbsis Q, Dompeling E, Penders J. 2020. Gut microbiota in wheezing preschool children and the association with childhood asthma. *Allergy*. 75(6):1473-1476.
59. Espuela-Ortiz A, Lorenzo-Diaz F, Baez-Ortega A, Eng C, Hernandez-Pacheco N, Oh SS, Lenoir M, Burchard EG, Flores C, Pino-Yanes M. 2019. Bacterial salivary microbiome associates with asthma among african american children and young adults. *Pediatric pulmonology*. 54(12):1948-1956.
60. Lee JJ, Kim SH, Lee MJ, Kim BK, Song WJ, Park HW, Cho SH, Hong SJ, Chang YS, Kim BS. 2019. Different upper airway microbiome and their functional genes associated with asthma in young adults and elderly individuals. *Allergy*. 74(4):709-719.
61. Pang Z, Wang G, Gibson P, Guan X, Zhang W, Zheng R, Chen F, Wang Z, Wang F. 2019. Airway Microbiome in Different Inflammatory Phenotypes of Asthma: A Cross-Sectional Study in Northeast China. *International journal of medical sciences*. 16(3):477-485.
62. Powell EA, Fontanella S, Boakes E, Belgrave D, Shaw AG, Cornwell E, Fernandez-Crespo R, Fink CG, Custovic A, Kroll JS. 2019. Temporal association of the development of oropharyngeal microbiota with early life wheeze in a population-based birth cohort. *EBioMedicine*. 46:486-498.
63. Samra M, Nam SK, Lim DH, Kim DH, Yang J, Kim YK, Kim JH. 2019. Urine Bacteria-Derived Extracellular Vesicles and Allergic Airway Diseases in Children. *International archives of allergy and immunology*. 178(2):150-158.
64. Thorsen J, Rasmussen MA, Waage J, Mortensen M, Brejnrod A, Bønnelykke K, Chawes BL, Brix S, Sørensen SJ, Stokholm J, Bisgaard H. 2019. Infant airway microbiota and topical immune perturbations in the origins of childhood asthma. *Nature Communications*. 10(1):5001.
65. Al Bataineh MT, Hamoudi RA, Dash NR, Ramakrishnan RK, Almasalmeh MA, Sharif HA, Al-Hajjaj MS, Hamid Q. 2020. Altered respiratory microbiota composition and functionality associated with asthma early in life. *BMC infectious diseases*. 20(1):697.
66. Chiu C-Y, Chan Y-L, Tsai M-H, Wang C-J, Chiang M-H, Chiu C-C, Su S-C. 2020. Cross-talk between airway and gut microbiome links to IgE responses to house dust mites in childhood airway allergies. *Scientific Reports*. 10(1):13449.
67. Patrick DM, Sbihi H, Dai DLY, Al Mamun A, Rasali D, Rose C, Marra F, Boutin RCT, Petersen C, Stiemsma LT, Winsor GL, Brinkman FSL, Kozyrskyj AL, Azad MB, Becker AB, Mandhane PJ, Moraes TJ, Sears MR, Subbarao P, Finlay BB, Turvey SE. 2020. Decreasing antibiotic use, the gut microbiota, and asthma incidence in children: evidence from population-based and prospective cohort studies. *The Lancet Respiratory medicine*. 8(11):1094-1105.

68. Ruokolainen L, Parkkola A, Karkman A, Sinkko H, Peet A, Hämäläinen AM, von Hertzen L, Tillmann V, Koski K, Virtanen SM, Niemelä O, Haahtela T, Knip M. 2020. Contrasting microbiotas between Finnish and Estonian infants: Exposure to *Acinetobacter* may contribute to the allergy gap. *Allergy*. 75(9):2342-2351.
69. Toivonen L, Karppinen S, Schuez-Havupalo L, Waris M, He Q, Hoffman KL, Petrosino JF, Dumas O, Camargo CA, Jr., Hasegawa K, Peltola V. 2020. Longitudinal Changes in Early Nasal Microbiota and the Risk of Childhood Asthma. *Pediatrics*. 146(4).
70. Ham J, Kim J, Choi S, Park J, Baek MG, Kim YC, Sohn KH, Cho SH, Yang S, Bae YS, Chung DH, Won S, Yi H, Kang HR, Kim HY. 2021. Interactions between NCR(+)ILC3s and the Microbiome in the Airways Shape Asthma Severity. *Immune network*. 21(4):e25.
71. Niemeier-Walsh C, Ryan PH, Meller J, Ollberding NJ, Adhikari A, Reponen T. 2021. Exposure to traffic-related air pollution and bacterial diversity in the lower respiratory tract of children. *PloS one*. 16(6):e0244341.
72. Samra MS, Lim DH, Han MY, Jee HM, Kim YK, Kim JH. 2021. Bacterial Microbiota-derived Extracellular Vesicles in Children With Allergic Airway Diseases: Compositional and Functional Features. *Allergy, asthma & immunology research*. 13(1):56-74.
73. Schei K, Simpson MR, Øien T, Salamati S, Rudi K, Ødegård RA. 2021. Allergy-related diseases and early gut fungal and bacterial microbiota abundances in children. *Clinical and translational allergy*. 11(5):e12041.
74. Seppo AE, Bu K, Jumabaeva M, Thakar J, Choudhury RA, Yonemitsu C, Bode L, Martina CA, Allen M, Tamburini S, Piras E, Wallach DS, Looney RJ, Clemente JC, Järvinen KM. 2021. Infant gut microbiome is enriched with *Bifidobacterium longum* ssp. *infantis* in Old Order Mennonites with traditional farming lifestyle. *Allergy*. 76(11):3489-3503.
75. Turek EM, Cox MJ, Hunter M, Hui J, James P, Willis-Owen SAG, Cuthbertson L, James A, Musk AW, Moffatt MF, Cookson W. 2021. Airway microbial communities, smoking and asthma in a general population sample. *EBioMedicine*. 71:103538.
76. Bar K, Żebrowska P, Łaczmanski Ł, Sozańska B. 2022. Airway Bacterial Biodiversity in Exhaled Breath Condensates of Asthmatic Children-Does It Differ from the Healthy Ones? *Journal of clinical medicine*. 11(22).
77. Lee-Sarwar KA, Chen YC, Chen YY, Kozyrskyj AL, Mandhane PJ, Turvey SE, Subbarao P, Bisgaard H, Stokholm J, Chawes B, Sørensen SJ, Kelly RS, Lasky-Su J, Zeiger RS, O'Connor GT, Sandel MT, Bacharier LB, Beigelman A, Carey VJ, Harshfield BJ, Laranjo N, Gold DR, Weiss ST, Litonjua AA. 2023. The maternal prenatal and offspring early-life gut microbiome of childhood asthma phenotypes. *Allergy*. 78(2):418-428.
78. Lee-Sarwar K, Dedrick S, Momeni B, Kelly RS, Zeiger RS, O'Connor GT, Sandel MT, Bacharier LB, Beigelman A, Laranjo N, Gold DR, Lasky-Su J, Litonjua AA, Liu YY, Weiss ST. 2022. Association of the gut microbiome and metabolome with wheeze frequency in childhood asthma. *The Journal of allergy and clinical immunology*. 150(2):325-336.

79. Tsai MH, Shih HJ, Su KW, Liao SL, Hua MC, Yao TC, Lai SH, Yeh KW, Chen LC, Huang JL, Chiu CY. 2022. Nasopharyngeal microbial profiles associated with the risk of airway allergies in early childhood. *Journal of microbiology, immunology, and infection = Wei mian yu gan ran za zhi*. 55(4):777-785.
80. Zheng P, Zhang K, Lv X, Liu C, Wang Q, Bai X. 2022. Gut Microbiome and Metabolomics Profiles of Allergic and Non-Allergic Childhood Asthma. *Journal of asthma and allergy*. 15:419-435.
81. Mubanga M, Ploner A, Schuppe-Koistinen I, Magnusson PKE, Boulund F, Debelius JW, Almqvist C. 2023. The gut microbiome and asthma in a Swedish twin study. *Clinical & Experimental Allergy*. 53(11):1212-1215.
82. Thorsen J, Li XJ, Peng S, Sunde RB, Shah SA, Bhattacharyya M, Poulsen CS, Poulsen CE, Leal Rodriguez C, Widdowson M, Neumann AU, Trivedi U, Chawes B, Bønnelykke K, Bisgaard H, Sørensen SJ, Stokholm J. 2023. The airway microbiota of neonates colonized with asthma-associated pathogenic bacteria. *Nature Communications*. 14(1):6668.
