# Supplementary material
Source: PubMed Central journal article supplement (PMC11218706)
Supplement: ehp13948.smcontents.508.pdf [file ehp13948.smcontents.508.pdf]

**Note to readers with disabilities:** *EHP* strives to ensure that all journal content is accessible to all readers. However, some figures and Supplemental Material published in *EHP* articles may not conform to [508 standards](#) due to the complexity of the information being presented. If you need assistance accessing journal content, please contact [ehpsubmissions@niehs.nih.gov](mailto:ehpsubmissions@niehs.nih.gov). Our staff will work with you to assess and meet your accessibility needs within 3 working days.

### **Supplemental Material**

#### **The Role of Biodiversity in the Development of Asthma and Allergic Sensitization: A State-of-the-Science Review**

Inês Paciência, Needhi Sharma, Timo T. Hugg, Aino K. Rantala, Behzad Heibati, Wael K. Al-Delaimy, Maritta S. Jaakkola, and Jouni J.K. Jaakkola

#### **Table of Contents**

##### **PRISMA checklist**

**Table S1.** Characteristics of studies included in the comprehensive review (n=82).

**Table S2.** Main results of studies included in the comprehensive review (n=82) and summary of evidence.

**Table S3.** Microbiota composition between cases and controls for the main phyla/genera detected or effect estimate for the main phyla/genera detected.

**Table S4.** Summary of the evidence on the association between outer layer biodiversity and respiratory outcomes (based on information included in Table 1 "*Outer layer biodiversity*").

**Table S5.** Summary of the evidence on the association between inner layer biodiversity and respiratory outcomes (based on information included in Table 1 "*Inner layer biodiversity*").

##### **References**
